# Supplementary material for: Assessment of Autism Zebrafish Mutant Models Using a High-Throughput Larval Phenotyping Platform
Source: Front Cell Dev Biol. 2020 Nov 23;8:586296. doi: 10.3389/fcell.2020.586296 (PMC7719691; doi:10.3389/fcell.2020.586296)
Supplement: Supplementary file 2 [file Table_1.XLSX]

## Sheet: S1
Table S1. Oligonucleotide sequences
Gene	Category	Oligo 1	Oligo 2
syngap1b	gRNA	AGCGAGGGAGGATCATGTGGCGG	n/a
syngap1b	Illumina/Sanger validation	CTGAAGGGGTCCATTAAACG	CTTTAAGACAGTCCAGACCGG
syngap1b	qRT-PCR	TGAACAGGCTTGATGATGGC	CACAGCTTCAGGACGTTGTC
syngap1a	syngap1b off-target 1	GACTCACAGTGCCCTCTGCT	CACACACACTCTCTCTTGGACA
phf24	syngap1b off-target 2	CCATATGGATCATTCCACATCA	AGCCGGCAATAGATAGACAA
DOCK9	syngap1b off-target 3	TGAGGGTCAGTCAGGAGGAG	AACTCACAAAACAGCAAATAATGC
ptk2aa	syngap1b off-target 4	TGGCTCTGATTTTTGCCATT	ATCTCGAAACAAACCCATCG
gdi1	syngap1b off-target 5	TGGGGGAACTGCCTCAAG	TCAACCAACACATTTCCAACTC
cdk15	syngap1b off-target 6	AAAAACAGTCAAAATGATCCACAA	TGTTTGTTTTATTCTGTAAATGAAGGA
pitx3	syngap1b off-target 7	TTGCTTGTGACGGATTTTTG	CACTGTTCACTGTTTGACTGAGA
adss	syngap1b off-target 8	CGCATGCGTTTGAATTTTGT	GGAAGCTGTAGAGAGGCAGTG
emc10	syngap1b off-target 9	TAAGCAATGTGCCACACACA	TGAGGACCCCTGTTATGGAG
si:dkey-14d8.20	syngap1b off-target 10	ACAAAACAACACATCAAGAGGTT	TGCAGAGGAGCTGTTGTAGG
arhgef40	syngap1b off-target 11	ACTGGAGGAGTGTTGGGTTG	TTTAGGATCTTCAAGACCAGTGC
ccser2b	syngap1b off-target 12	AGAATGTTTGTCTGTAGTCCAGGT	TCCAGTACTGCTATTGATTGCTATG
gbe1b	syngap1b off-target 13	GGGATCTGCATACAGCAACA	CTGGATGATGTCCAAGAGCA
slc7a5	gRNA-1 (used for stable line and pool)	ACGGGATGAAGACGACAAGCAGG	n/a
slc7a5	gRNA-2 (used in pool)	CTTCGTGACCCCAACCGGAGTGG	n/a
slc7a5	gRNA-3 (used in pool)	CAAGGCGAGTAGCTTAGCAGCGG	n/a
slc7a5	Illumina/Sanger for gRNA-1	GCGTTGCTTTGTTTGACAAG	GATATCTGTGCTCGGGCTTC
slc7a5	Illumina/Sanger for gRNA-2	GCGGATGGAGAAGAGACAGT	CGCGCCTATAGTGGAGAAGA
slc7a5	Illumina/Sanger for gRNA-3	TGACCGCTGTCAACTGCTAC	TCGCCTTTATTGACCTGACC
slc7a5	qRT-PCR	TGAAACTGTGGATCGAGCTG	GACTTTGGCAACATCGGATT
pls1	slc7a5 off-target 1	ATAAGGCAAAGCAGCTCCAA	CCTGAAGCACACCTCCTCTC
LOC559131	slc7a5 off-target 2	GGCCACATTACAGGAACTGG	TGGAATGTTTTTGGTTCCTTG
tmem266	slc7a5 off-target 3	GTTAACACGCATCCGTCAAA	GTCGAACGTGGCAAATGTAA
zgc:92041	slc7a5 off-target 4	GAAGCACCGTGAAGAACACC	AAGACGGTTGGCTTCTGGTA
roraa	slc7a5 off-target 5	CCCAACACTCAACCCAACTC	CGCTGGACTTCCTAATGGAG
zc3h7ba	slc7a5 off-target 6	ACCACTGAGTTGTGAGAGCAGA	TTGTTTCTTTTGGGTTGTGC
β-actin	qRT-PCR control	CGAGCAGGAGATGGGAACC	CAACGGAAACGCTCATTGC

## Sheet: S2
Table S2. Summary of wild-type larvae morphometric and behavioral data
FishID	Treatments					VAST morphometric measurements					DanioVision measurements
	VAST3dpf	VAST5dpf	VAST3and5dpf	Behavior	PTZ concentration (mM)	Area of first eye (mm2)	Area of second eye (mm2)	Length (mm)	Tel (mm)	OT (mm)	Average movement in 1h (mm/min)	Average movement last 15 min (mm/min)
1_2_A12	0	1	0	1	10	0.0446134	0.0509423	3.19633	0.15	0.449	49.6148	52.3846
1_2_B04	0	1	0	1	10	0.0623358	0.0649564	3.3044	0.153	0.516	138.342	133.869
1_2_B06	0	1	0	1	10	0.0632059	0.0645435	3.63109	0.169	0.55	146.118	87.2731
1_2_C04	0	1	0	1	10	0.0573242	0.0583073	3.40464	0.161	0.524	133.756	69.6767
1_2_D03	0	1	0	1	10	0.0558733	0.0637366	3.44103	0.135	0.483	191.591	149.29
1_2_D04	0	1	0	1	10	0.0649636	0.061967	3.55758	0.154	0.499	144.33	71.0983
1_2_D06	0	1	0	1	10	0.0675839	0.0652971	3.57175	0.153	0.499	144.669	97.1469
1_2_F07	0	1	0	1	10	0.0624997	0.0640007	3.51002	0.177	0.55	147.164	94.2361
1_2_F11	0	1	0	1	10	0.0466709	0.0466078	3.18223	0.14	0.48	75.3006	40.7316
1_2_G05	0	1	0	1	10	0.0601734	0.0642155	3.27107	0.14	0.519	134.573	77.4654
1_2_H10	0	1	0	1	10	0.0657318	0.065335	3.42423	0.168	0.516	157.371	77.7188
2_1_A09	0	1	0	1	10	0.0667233	0.0654341	3.55376	0.171	0.522
2_1_A11	0	1	0	1	10	0.0619019	0.0581207	3.21969	0.155	0.479
2_1_B04	0	1	0	1	10	0.066199	0.0601279	3.31789	0.168	0.483
2_1_B05	0	1	0	1	10	0.0590993	0.0506803	3.08939	0.152	0.48
2_1_B09	0	1	0	1	10	0.0581226	0.0597946	3.28865	0.165	0.482
2_1_C08	0	1	0	1	10	0.0517282	0.0571223	3.32994	0.137	0.482
2_1_D01	0	1	0	1	10	0.0621578	0.0622352	3.31547	0.166	0.5
2_1_D04	0	1	0	1	10	0.0450397	0.0619517	3.52677	0.174	0.471
2_1_D08	0	1	0	1	10	0.0629587	0.0643665	3.51314	0.155	0.513
2_2_A03	0	1	0	1	10	0.0589542	0.0599463	3.54115	0.184	0.492	186.693	167.57
2_2_A09	0	1	0	1	10	0.0573373	0.0528673	3.30929	0.13	0.473	125.817	118.624
2_2_B01	0	1	0	1	10	0.0588178	0.0538253	3.45433	0.153	0.483	148.371	129.764
2_2_B02	0	1	0	1	10	0.0607183	0.0603751	3.52602	0.144	0.474	207.437	212.368
2_2_B06	0	1	0	1	10	0.0669356	0.062729	3.66169	0.132	0.506	208.284	209.741
2_2_B10	0	1	0	1	10	0.0592129	0.0582877	3.52427	0.139	0.508	190.553	165.336
2_2_C01	0	1	0	1	10	0.0525968	0.0529419	3.3519	0.142	0.487	146.283	112.394
2_2_C08	0	1	0	1	10	0.0648489	0.0641437	3.59817	0.128	0.511	170.141	138.379
2_2_C09	0	1	0	1	10	0.0615979	0.060853	3.50576	0.119	0.482	164.469	146.586
2_2_D03	0	1	0	1	10	0.0556747	0.0596888	3.55871	0.147	0.514	162.81	158.785
2_2_D05	0	1	0	1	10	0.0638037	0.0635263	3.70762	0.116	0.491	191.588	139.105
2_2_E04	0	1	0	1	10	0.0661732	0.0700339	3.74009	0.121	0.513	209.689	186.18
2_2_E07	0	1	0	1	10	0.0492221	0.0500831	3.16144	0.138	0.502	188.597	197.599
2_2_F06	0	1	0	1	10	0.0662447	0.0710973	3.70059	0.134	0.516	228.593	167.438
2_2_F09	0	1	0	1	10	0.0662892	0.0687014	3.64619	0.144	0.528	236.805	189.503
2_2_F12	0	1	0	1	10	0.053801	0.0524978	3.33974	0.147	0.494	148.894	126.992
2_2_G01	0	1	0	1	10	0.0683257	0.0694675	3.64898	0.117	0.51	198.747	175.215
2_2_G07	0	1	0	1	10	0.0624559	0.062687	3.65354	0.147	0.516	231.695	172.639
2_2_G11	0	1	0	1	10	0.0640984	0.0629728	3.56612	0.166	0.529	165.289	169.707
2_2_H12	0	1	0	1	10	0.0681709	0.0648056	3.54394	0.173	0.537	213.582	175.076
3_1_B12	1	0	0	0	0	0.0445453	0.0520715	3.14405	0.154	0.458
3_1_C01	1	0	0	0	0	0.046556	0.038379	2.86876	0.154	0.407
3_1_C04	1	0	0	0	0	0.0438634	0.0370274	3.03135	0.157	0.421
3_1_C06	1	0	0	0	0	0.0447319	0.0407066	2.97474	0.154	0.418
3_1_C08	1	0	0	0	0	0.0434387	0.0455717	3.01929	0.168	0.471
3_1_C10	1	0	1	1	10	0.0463429	0.0449379	2.90115	0.163	0.48
3_1_C12	1	0	0	0	0	0.0460677	0.0469803	2.86272	0.16	0.455
3_1_D03	0	0	1	1	10	0.0553203	0.0539073	3.46069	0.141	0.452	211.867	162.585
3_1_D07	0	0	1	1	10	0.0535737	0.0497685	3.58659	0.138	0.457	172.369	91.9057
3_1_D10	0	0	1	1	10	0.0577708	0.0635442	3.66523	0.139	0.481	208.134	167.43
3_1_D12	1	0	0	0	0	0.0492752	0.0511963	2.95448	0.154	0.472
3_1_E05	1	0	1	1	10	0.0445596	0.0520891	2.96943	0.154	0.454
3_1_E07	0	0	1	1	10	0.0611411	0.0611999	3.65603	0.141	0.489	249.29	159.868
3_1_E10	1	0	1	1	10	0.0442296	0.0493414	3.06155	0.149	0.438
3_1_F02	1	0	0	0	0	0.0509488	0.0460195	3.13425	0.18	0.508
3_1_F03	1	0	0	0	0	0.0374437	0.0387274	3.01634	0.181	0.424
3_1_F10	1	0	1	1	10	0.0447966	0.0479189	3.11702	0.154	0.468
3_1_G01	1	0	0	0	0	0.0432222	0.0463608	3.08665	0.166	0.488
3_1_G03	1	0	0	0	0	0.0496899	0.0458213	3.00772	0.172	0.461
3_1_G05	1	0	0	0	0	0.0457349	0.05383	3.02838	0.16	0.483
3_1_G06	1	0	0	0	0	0.0496469	0.0512059	2.97261	0.154	0.486
3_1_G08	1	0	0	0	0	0.04945	0.0490258	2.9054	0.165	0.449
3_1_G09	1	0	0	0	0	0.0311476	0.0294806	2.90757	0.16	0.404
3_1_G12	1	0	0	0	0	0.0464503	0.0467466	2.97035	0.168	0.463
3_1_H01	1	0	0	0	0	0.0504156	0.0506946	2.99027	0.164	0.503
3_1_H03	1	0	0	0	0	0.0416962	0.0420649	2.87197	0.155	0.442
3_1_H05	1	0	0	0	0	0.0423084	0.0442065	3.01006	0.157	0.477
3_1_H06	1	0	0	0	0	0.0466411	0.0484632	3.03877	0.154	0.486
3_1_H12	1	0	1	1	10	0.0491117	0.0497353	2.97945	0.14	0.465
3_2_A01	0	0	0	1	0						49.8389	15.3522
3_2_A02	0	0	0	1	0						22.4721	5.43609
3_2_A03	0	0	0	1	0						51.1254	0.310858
3_2_A04	0	0	0	1	0						21.2735	18.148
3_2_A05	0	0	0	1	0						89.9592	26.5285
3_2_A06	0	0	0	1	0						65.8277	6.24727
3_2_A07	0	0	0	1	0						21.7287	1.9435
3_2_A08	0	0	0	1	0						57.8379	26.0965
3_2_A09	0	0	0	1	0						117.384	70.487
3_2_A10	0	0	0	1	0						83.5226	10.3362
3_2_A11	0	0	0	1	0						25.8208	21.2273
3_2_A12	0	0	0	1	0						40.391	40.1312
3_2_B01	0	0	0	1	0						64.334	17.3818
3_2_B02	0	0	0	1	0						60.9052	16.1891
3_2_B03	0	0	0	1	0						50.0943	1.47162
3_2_B04	0	0	0	1	0						35.0303	3.52477
3_2_B05	0	0	0	1	0						29.9036	0
3_2_B06	0	0	0	1	0						109.754	25.7213
3_2_B07	0	0	0	1	0						54.295	3.98629
3_2_B08	0	0	0	1	0						34.2182	4.70364
3_2_B09	0	0	0	1	0						20.4428	7.46686
3_2_B10	0	0	0	1	0						66.2242	23.4726
3_2_B11	0	0	0	1	0						50.6492	12.0081
3_2_B12	0	0	0	1	0						3.15976	0.0313535
3_2_C01	0	0	0	1	0						66.1725	27.8479
3_2_C02	0	0	0	1	0						48.48	14.0419
3_2_C03	0	0	0	1	0						19.796	1.97269
3_2_C04	0	0	0	1	0						45.9545	7.57771
3_2_C05	0	0	0	1	0						60.374	42.6862
3_2_C06	0	0	0	1	0						42.1051	5.46234
3_2_C07	0	0	0	1	0						32.8055	8.2348
3_2_C08	0	0	0	1	0						38.1265	1.99767
3_2_C09	0	0	0	1	0						50.6727	5.2902
3_2_C10	0	0	0	1	0						42.162	2.21917
3_2_C11	0	0	0	1	0						59.9801	10.932
3_2_C12	0	0	0	1	0						61.8205	17.8929
3_2_D01	0	0	0	1	0						36.7286	0.739829
3_2_D02	0	0	0	1	0						37.1405	7.69495
3_2_D03	0	0	0	1	0						84.6852	19.0029
3_2_D04	0	0	0	1	0						20.2345	12.9893
3_2_D05	0	0	0	1	0						72.7835	27.0309
3_2_D06	0	0	0	1	0						73.8439	22.6168
3_2_D07	0	0	0	1	0						62.9796	51.8642
3_2_D08	0	0	0	1	0						54.0308	8.83703
3_2_D09	0	0	0	1	0						20.1515	0
3_2_D10	0	0	0	1	0						13.7048	4.3965
3_2_D11	0	0	0	1	0						66.5611	23.8668
3_2_D12	0	0	0	1	0						26.1571	0
3_2_E01	0	0	0	1	0						42.0554	8.0142
3_2_E02	0	0	0	1	0						31.0369	7.4223
3_2_E03	0	0	0	1	0						127.761	63.3534
3_2_E04	0	0	0	1	0						102.284	43.483
3_2_E05	0	0	0	1	0						78.0836	28.3545
3_2_E06	0	0	0	1	0						45.8535	10.8638
3_2_E07	0	0	0	1	0						52.5391	13.2737
3_2_E08	0	0	0	1	0						71.8973	24.6958
3_2_E09	0	0	0	1	0						42.1158	6.66764
3_2_E10	0	0	0	1	0						65.3746	29.8818
3_2_E11	0	0	0	1	0						80.249	16.3048
3_2_E12	0	0	0	1	0						13.4134	1.08183
3_2_F01	0	0	0	1	0						32.9342	14.4513
3_2_F02	0	0	0	1	0						58.5457	8.32069
3_2_F03	0	0	0	1	0						47.0212	6.65792
3_2_F04	0	0	0	1	0						70.9013	41.1035
3_2_F05	0	0	0	1	0						171.994	85.9553
3_2_F06	0	0	0	1	0						98.9947	35.9237
3_2_F07	0	0	0	1	0						40.2435	5.92448
3_2_F08	0	0	0	1	0						38.5918	11.8348
3_2_F09	0	0	0	1	0						17.7438	2.2679
3_2_F10	0	0	0	1	0						16.7723	0.329666
3_2_F11	0	0	0	1	0						43.998	4.68307
3_2_F12	0	0	0	1	0						97.8191	5.03817
3_2_G01	0	0	0	1	0						38.8213	1.88331
3_2_G02	0	0	0	1	0						55.265	10.3671
3_2_G03	0	0	0	1	0						34.3736	1.35524
3_2_G04	0	0	0	1	0						45.872	9.57119
3_2_G05	0	0	0	1	0						65.3463	34.2407
3_2_G06	0	0	0	1	0						20.4752	7.13222
3_2_G07	0	0	0	1	0						67.0321	16.444
3_2_G09	0	0	0	1	0						40.784	13.3666
3_2_G10	0	0	0	1	0						8.14995	3.09143
3_2_G11	0	0	0	1	0						21.2618	0.148828
3_2_G12	0	0	0	1	0						53.2774	19.2704
3_2_H01	0	0	0	1	0						40.9761	3.34653
3_2_H02	0	0	0	1	0						29.0677	14.322
3_2_H03	0	0	0	1	0						99.5829	15.8242
3_2_H04	0	0	0	1	0						79.8993	1.28361
3_2_H05	0	0	0	1	0						79.3157	18.8741
3_2_H06	0	0	0	1	0						29.9122	0.421305
3_2_H07	0	0	0	1	0						42.3411	11.9549
3_2_H08	0	0	0	1	0						55.0154	5.70477
3_2_H09	0	0	0	1	0						57.2722	12.4466
3_2_H10	0	0	0	1	0						76.2635	10.8496
3_2_H11	0	0	0	1	0						29.0678	7.45792
3_2_H12	0	0	0	1	0						39.9872	3.81669
3_3_A01	0	1	0	1	10	0.0642829	0.0581439	3.50356	0.145	0.481	157.808	144.782
3_3_A02	0	1	0	1	10	0.060701	0.0661812	3.65664	0.158	0.478	141.679	116.234
3_3_A03	0	1	0	1	10	0.0624287	0.0605741	3.59923	0.156	0.457	175.13	160.384
3_3_A05	0	1	0	1	10	0.0575779	0.0586211	3.49143	0.143	0.453	122.206	130.975
3_3_A06	0	1	0	1	10	0.0570435	0.0594931	3.51273	0.162	0.477	178.252	157.09
3_3_A07	0	1	0	1	10	0.0582934	0.061988	3.53925	0.156	0.49	151.079	136.952
3_3_A08	0	1	0	1	10	0.0642981	0.0604852	3.54568	0.162	0.461	173.354	158.116
3_3_A09	0	1	0	1	10	0.0637751	0.0618607	3.6074	0.158	0.479	156.422	133.289
3_3_A10	0	1	0	1	10	0.0647791	0.061309	3.54841	0.153	0.473	145.769	118.043
3_3_B02	0	1	0	1	10	0.0639687	0.0598652	3.26578	0.159	0.474	162.203	144.762
3_3_B03	0	1	0	1	10	0.0589228	0.0605709	3.59866	0.144	0.473	171.93	157.994
3_3_B05	0	1	0	1	10	0.0585301	0.069564	3.53298	0.143	0.484	178.472	142.126
3_3_B06	0	1	0	1	10	0.0672376	0.0632607	3.6619	0.16	0.463	169.373	145.156
3_3_B07	0	1	0	1	10	0.0641271	0.0639254	3.74267	0.141	0.481	168.147	129.525
3_3_B08	0	1	0	1	10	0.0562734	0.0624707	3.46319	0.155	0.479	187.143	177.842
3_3_B09	0	1	0	1	10	0.0678174	0.0627994	3.53762	0.15	0.482	185.858	182.377
3_3_B10	0	1	0	1	10	0.0638715	0.0650924	3.68725	0.168	0.476	199.222	149.607
3_3_C01	0	1	0	1	10	0.0652251	0.0619846	3.68721	0.151	0.488	206.785	162.401
3_3_C03	0	1	0	1	10	0.0679872	0.0612373	3.50002	0.154	0.49	183.667	156.284
3_3_C04	0	1	0	1	10	0.0620719	0.0630643	3.58756	0.154	0.472	192.354	174.278
3_3_C05	0	1	0	1	10	0.054014	0.0533009	3.28209	0.145	0.456	119.557	123.957
3_3_C07	0	1	0	1	10	0.0638905	0.0593691	3.62893	0.153	0.474	183.798	159.311
3_3_C08	0	1	0	1	10	0.0594105	0.05907	3.41606	0.155	0.479	143.897	137.375
3_3_C09	0	1	0	1	10	0.0592906	0.0641509	3.66406	0.15	0.48	185.742	180.546
3_3_C11	0	1	0	1	10	0.061605	0.0629171	3.6425	0.15	0.469	148.412	145.017
3_3_C12	0	1	0	1	10	0.0619454	0.0616585	3.61866	0.176	0.51	160.711	130.24
3_3_D03	0	1	0	1	10	0.0542351	0.0562658	3.32696	0.156	0.469	186.109	146.961
3_3_D04	0	1	0	1	10	0.0643327	0.0617769	3.59177	0.146	0.471	171.664	150.584
3_3_D06	0	1	0	1	10	0.0623827	0.0605079	3.40031	0.136	0.469	158.583	123.128
3_3_D07	0	1	0	1	10	0.0627012	0.0603721	3.5935	0.155	0.485	166.448	135.613
3_3_D08	0	1	0	1	10	0.0619767	0.0592743	3.65859	0.155	0.471	149.201	144.241
3_3_D09	0	1	0	1	10	0.0537155	0.051723	3.34159	0.151	0.464	161.034	147.807
3_3_D10	0	1	0	1	10	0.0579877	0.0609746	3.54784	0.157	0.489	168.319	158.03
3_3_E02	0	1	0	1	10	0.062432	0.0631269	3.70007	0.155	0.484	174.02	149.114
3_3_E03	0	1	0	1	10	0.0634488	0.0670367	3.6583	0.159	0.505	163.179	155.259
3_3_E04	0	1	0	1	10	0.0606372	0.0611304	3.50702	0.153	0.504	167.402	136.506
3_3_E06	0	1	0	1	10	0.0648453	0.0611547	3.62268	0.142	0.491	207.735	192.591
3_3_E08	0	1	0	1	10	0.063299	0.0635643	3.67425	0.155	0.495	177.732	158.475
3_3_F01	0	1	0	1	10	0.0628878	0.061814	3.62053	0.135	0.497	203.332	184.22
3_3_F02	0	1	0	1	10	0.0652317	0.0613791	3.63435	0.151	0.487	181.254	163.063
3_3_F05	0	1	0	1	10	0.0637615	0.0648176	3.60051	0.168	0.494	196.252	150.833
3_3_F06	0	1	0	1	10	0.0648161	0.0655508	3.73342	0.162	0.483	177.694	173.758
3_3_F07	0	1	0	1	10	0.0627439	0.0636212	3.57154	0.144	0.478	164.308	154.717
3_3_F08	0	1	0	1	10	0.059832	0.06213	3.58572	0.151	0.484	179.459	162.852
3_3_F10	0	1	0	1	10	0.0556808	0.0627893	3.6639	0.155	0.486	197.775	167.901
3_3_F11	0	1	0	1	10	0.0581169	0.0590546	3.69362	0.171	0.471	179.417	137.992
3_3_G01	0	1	0	1	10	0.0629931	0.0632954	3.57575	0.135	0.461	200.029	156.818
3_3_G02	0	1	0	1	10	0.0700556	0.0636508	3.50441	0.148	0.484	152.342	136.723
3_3_G03	0	1	0	1	10	0.0684437	0.0615493	3.6562	0.156	0.486	180.246	151.076
3_3_G05	0	1	0	1	10	0.0563328	0.0578421	3.49018	0.153	0.479	154.178	154.251
3_3_G06	0	1	0	1	10	0.0671972	0.0637962	3.57098	0.157	0.491	170.936	160.702
3_3_G07	0	1	0	1	10	0.0617805	0.0601585	3.5443	0.163	0.486	194.668	164.494
3_3_G09	0	1	0	1	10	0.0614908	0.0600366	3.59338	0.172	0.483	146.277	143.948
3_3_G10	0	1	0	1	10	0.0679736	0.0623684	3.42989	0.143	0.483	175.342	169.029
3_3_G11	0	1	0	1	10	0.0599092	0.0610373	3.61575	0.159	0.486	170.243	141.653
3_3_G12	0	1	0	1	10	0.0639195	0.0592775	3.6611	0.175	0.504	163.877	142.99
3_3_H01	0	1	0	1	10	0.0679155	0.0617272	3.68311	0.163	0.5	183.447	146.569
3_3_H02	0	1	0	1	10	0.0614722	0.0650147	3.7052	0.155	0.497	177.978	160.979
3_3_H03	0	1	0	1	10	0.0672768	0.0634983	3.72027	0.155	0.48	184.53	158.598
3_3_H04	0	1	0	1	10	0.0647616	0.0644284	3.59581	0.146	0.48	198.734	177.279
3_3_H05	0	1	0	1	10	0.0626639	0.0628992	3.54384	0.142	0.478	138.362	140.77
3_3_H07	0	1	0	1	10	0.060893	0.061147	3.62391	0.17	0.502	153.529	153.886
3_3_H08	0	1	0	1	10	0.0655359	0.0651416	3.68842	0.155	0.496	208.489	194.56
3_3_H11	0	1	0	1	10	0.0614784	0.0626719	3.56585	0.171	0.491	132.05	140.523
3_3_H12	0	1	0	1	10	0.064903	0.064287	3.57219	0.17	0.503	132.319	121.432
3_4_A05	0	1	0	1	10	0.0669278	0.0581045	3.7086	0.152	0.487	141.951	134.215
3_4_A06	0	1	0	1	10	0.0648219	0.062698	3.67341	0.152	0.489	139.844	99.2164
3_4_A08	0	1	0	1	10	0.0640689	0.0659044	3.67746	0.166	0.48	135.562	121.509
3_4_A11	0	1	0	1	10	0.0607038	0.0612517	3.64012	0.149	0.472	119.443	108.609
3_4_B01	0	1	0	1	10	0.0626378	0.0618067	3.59729	0.16	0.489	178.78	171.535
3_4_B04	0	1	0	1	10	0.0556798	0.0620327	3.59228	0.156	0.491	188.59	154.314
3_4_B05	0	1	0	1	10	0.062666	0.0630066	3.62434	0.139	0.485	173.481	152.142
3_4_B07	0	1	0	1	10	0.0648258	0.0627603	3.69663	0.166	0.485	215.654	192.768
3_4_B08	0	1	0	1	10	0.0636032	0.0646169	3.6582	0.159	0.489	186.155	147.757
3_4_B09	0	1	0	1	10	0.0618773	0.0597259	3.59425	0.148	0.454	160.419	120.227
3_4_B10	0	1	0	1	10	0.0623143	0.0618513	3.40759	0.162	0.476	155.685	151.168
3_4_B11	0	1	0	1	10	0.0610624	0.062795	3.51586	0.156	0.471	179.043	172.798
3_4_B12	0	1	0	1	10	0.0607398	0.0603709	3.44996	0.144	0.479	191.749	193.724
3_4_C01	0	1	0	1	10	0.0609093	0.0621811	3.48578	0.144	0.462	116.996	142.513
3_4_C04	0	1	0	1	10	0.0562276	0.0614446	3.50731	0.139	0.487	155.075	115.225
3_4_C05	0	1	0	1	10	0.0624688	0.0615791	3.62227	0.159	0.478	168.824	161.189
3_4_C06	0	1	0	1	10	0.0658921	0.065394	3.77453	0.148	0.485	119.344	134.593
3_4_C11	0	1	0	1	10	0.0605984	0.0596479	3.54302	0.139	0.478	161.053	128.625
3_4_D02	0	1	0	1	10	0.0585932	0.0583516	3.60443	0.146	0.467	171.051	164.839
3_4_D04	0	1	0	1	10	0.0682693	0.0648678	3.68628	0.154	0.496	257.673	206.014
3_4_D05	0	1	0	1	10	0.0594202	0.0638086	3.59313	0.16	0.49	182.172	138.43
3_4_D06	0	1	0	1	10	0.0579398	0.0613785	3.61613	0.148	0.484	184.199	176.52
3_4_D07	0	1	0	1	10	0.0679368	0.0614344	3.61971	0.151	0.48	210.132	174.144
3_4_D11	0	1	0	1	10	0.0628563	0.0652559	3.66175	0.154	0.487	195.798	170.788
3_4_E01	0	1	0	1	10	0.0605122	0.0624073	3.71718	0.15	0.475	192.074	186.071
3_4_E05	0	1	0	1	10	0.0582726	0.0660859	3.46755	0.166	0.48	181.934	161.587
3_4_E06	0	1	0	1	10	0.0626378	0.0679343	3.71324	0.151	0.471	190.096	181.462
3_4_E07	0	1	0	1	10	0.0721159	0.0600461	3.61318	0.15	0.48	189.228	151.095
3_4_E08	0	1	0	1	10	0.0643493	0.0621427	3.68537	0.148	0.471	218.558	179
3_4_E10	0	1	0	1	10	0.0616148	0.0622411	3.5788	0.161	0.481	177.906	146.208
3_4_E11	0	1	0	1	10	0.0606691	0.060203	3.71198	0.148	0.48	206.022	187.753
3_4_E12	0	1	0	1	10	0.0608528	0.0632803	3.72807	0.143	0.485	143.893	150.227
3_4_F01	0	1	0	1	10	0.0700501	0.0586545	3.61871	0.159	0.483	187.83	157.271
3_4_F02	0	1	0	1	10	0.0633001	0.0662258	3.61591	0.154	0.496	139.691	124.253
3_4_F03	0	1	0	1	10	0.067597	0.0615106	3.51888	0.148	0.471	192.631	186.558
3_4_F04	0	1	0	1	10	0.0639995	0.0643401	3.78859	0.141	0.475	179.254	120.052
3_4_F05	0	1	0	1	10	0.0637799	0.0621155	3.59905	0.15	0.486	114.3	137.021
3_4_F07	0	1	0	1	10	0.0638438	0.0657775	3.66942	0.162	0.477	176.079	156.445
3_4_F08	0	1	0	1	10	0.06356	0.062884	3.59871	0.145	0.478	165.919	157.4
3_4_F09	0	1	0	1	10	0.0588606	0.0581784	3.5492	0.158	0.493	143.561	111.029
3_4_F10	0	1	0	1	10	0.067801	0.0671123	3.76002	0.145	0.456	186.329	160.077
3_4_F11	0	1	0	1	10	0.0578393	0.0593006	3.60854	0.157	0.492	180.097	153.015
3_4_G01	0	1	0	1	10	0.0652573	0.068295	3.52031	0.117	0.484	178.981	159.23
3_4_G02	0	1	0	1	10	0.062846	0.0581904	3.62846	0.153	0.498	179.741	157.072
3_4_G03	0	1	0	1	10	0.0649824	0.0679703	3.75683	0.148	0.487	212.398	205.489
3_4_G04	0	1	0	1	10	0.0600072	0.0589904	3.59506	0.168	0.487	193.657	183.177
3_4_G05	0	1	0	1	10	0.0715252	0.0668455	3.78625	0.183	0.466	175.085	149.155
3_4_G08	0	1	0	1	10	0.0637656	0.0631948	3.68638	0.155	0.502	212.059	212.961
3_4_G10	0	1	0	1	10	0.065621	0.0679262	3.62782	0.139	0.478	176.936	162.373
3_4_G11	0	1	0	1	10	0.0675608	0.0624282	3.73719	0.138	0.497	201.83	180.963
3_4_G12	0	1	0	1	10	0.061165	0.0643303	3.57439	0.146	0.494	170.777	147.704
3_4_H02	0	1	0	1	10	0.0667055	0.0719382	3.65051	0.145	0.491	164.765	164.529
3_4_H04	0	1	0	1	10	0.064547	0.063385	3.70106	0.155	0.496	208.523	196.23
3_4_H05	0	1	0	1	10	0.0592966	0.060147	3.59018	0.146	0.478	196.23	135.681
3_4_H06	0	1	0	1	10	0.0657693	0.0626639	3.59527	0.168	0.48	116.185	159.991
3_4_H08	0	1	0	1	10	0.0645726	0.06525	3.60642	0.157	0.483	187.661	153.635
3_4_H09	0	1	0	1	10	0.0648099	0.0653909	3.76915	0.144	0.509	202.104	171.884
4_1_A02	1	0	0	0	0	0.0520227	0.0442042	3.08084	0.142	0.48
4_1_A04	1	0	0	0	0	0.0309787	0.0375558	2.92633	0.127	0.447
4_1_A05	1	0	0	0	0	0.0494635	0.0509028	3.08574	0.159	0.494
4_1_A06	1	0	1	1	0	0.0429775	0.0471507	2.9928	0.146	0.463
4_1_A07	1	0	0	0	0	0.0431511	0.0438541	3.12584	0.157	0.466
4_1_A09	1	0	1	1	0	0.0405399	0.0417621	2.90631	0.151	0.454
4_1_A10	1	0	0	0	0	0.0494282	0.0499711	3.01355	0.16	0.477
4_1_A11	1	0	0	0	0	0.0496627	0.0423137	3.064	0.166	0.454
4_1_B02	1	0	0	0	0	0.0414054	0.0463804	3.00532	0.146	0.454
4_1_B04	1	0	0	0	0	0.0351728	0.0336767	2.98997	0.151	0.441
4_1_B06	1	0	0	0	0	0.047174	0.0425537	2.94592	0.166	0.445
4_1_B07	1	0	0	0	0	0.0424353	0.0431631	2.9855	0.165	0.466
4_1_B08	1	0	0	0	0	0.0478488	0.0432034	2.9691	0.163	0.469
4_1_B09	1	0	0	0	0	0.0380126	0.0394707	2.88239	0.136	0.402
4_1_B11	1	0	0	0	0	0.0361197	0.0438692	3.01969	0.142	0.454
4_1_C01	1	0	1	1	0	0.0282272	0.0288238	2.76174	0.123	0.333
4_1_C02	1	0	0	0	0	0.0440548	0.0461514	3.11121	0.149	0.452
4_1_C03	1	0	0	0	0	0.0411405	0.038931	2.89708	0.179	0.46
4_1_C04	1	0	0	0	0	0.0442979	0.0381907	2.98376	0.154	0.438
4_1_C05	1	0	0	0	0	0.0429017	0.0451673	2.99479	0.165	0.446
4_1_C06	1	0	1	1	0	0.0373343	0.0390076	2.97584	0.151	0.417
4_1_C07	1	0	1	1	0	0.0414546	0.0441735	2.99286	0.146	0.451
4_1_C08	1	0	0	0	0	0.0419816	0.047077	3.01113	0.151	0.469
4_1_C09	1	0	0	0	0	0.0401832	0.0412406	2.93127	0.146	0.46
4_1_C10	1	0	0	0	0	0.0448772	0.0428985	2.93326	0.157	0.464
4_1_C12	1	0	1	1	0	0.041369	0.0386713	2.81168	0.151	0.438
4_1_D01	1	0	0	0	0	0.0423463	0.0437747	2.90232	0.15	0.456
4_1_D02	1	0	0	0	0	0.048223	0.0423707	2.92101	0.157	0.463
4_1_D03	1	0	0	0	0	0.0438609	0.0512176	3.0061	0.138	0.472
4_1_D04	1	0	0	0	0	0.0482567	0.0461409	3.04079	0.15	0.464
4_1_D05	1	0	0	0	0	0.0466122	0.0464292	3.04761	0.151	0.479
4_1_D06	1	0	0	0	0	0.036896	0.0380799	3.02686	0.151	0.441
4_1_D08	1	0	1	1	0	0.040891	0.0430711	3.11979	0.155	0.466
4_1_D09	1	0	0	0	0	0.0377721	0.0378808	2.96287	0.136	0.425
4_1_D11	1	0	0	0	0	0.0481066	0.047656	2.95018	0.142	0.436
4_1_E01	1	0	0	0	0	0.0471285	0.045139	3.04859	0.146	0.482
4_1_E02	1	0	0	0	0	0.0447004	0.0465158	2.98147	0.17	0.45
4_1_E03	1	0	0	0	0	0.0363878	0.0418403	3.05387	0.152	0.435
4_1_E04	1	0	0	0	0	0.0338212	0.0400301	3.02163	0.142	0.434
4_1_E05	1	0	1	1	0	0.039715	0.0397178	2.97873	0.138	0.441
4_1_E06	1	0	1	1	0	0.0463423	0.0393022	2.95719	0.14	0.415
4_1_E07	1	0	0	0	0	0.0388501	0.0369737	3.01846	0.148	0.432
4_1_E08	1	0	1	1	0	0.0320767	0.0443633	3.07924	0.142	0.438
4_1_E09	1	0	1	1	0	0.0413157	0.0482116	3.0033	0.15	0.451
4_1_E11	1	0	0	0	0	0.0413608	0.0455936	3.03845	0.153	0.481
4_1_F02	1	0	0	0	0	0.0371344	0.0359601	2.92463	0.148	0.41
4_1_F03	1	0	1	1	0	0.0448897	0.0441687	3.02071	0.151	0.469
4_1_F05	1	0	0	0	0	0.0501202	0.0455855	2.99171	0.152	0.49
4_1_F06	1	0	0	0	0	0.042339	0.0391647	2.97651	0.14	0.443
4_1_F07	1	0	1	1	0	0.0440699	0.0377704	2.90507	0.144	0.454
4_1_F08	1	0	1	1	0	0.0380314	0.0402291	2.91996	0.135	0.358
4_1_F09	1	0	0	0	0	0.0381824	0.0404111	3.04633	0.149	0.449
4_1_F10	1	0	0	0	0	0.0336483	0.0387435	2.95805	0.137	0.402
4_1_G01	1	0	0	0	0	0.0507019	0.0469523	3.18621	0.168	0.468
4_1_G02	1	0	0	0	0	0.0528919	0.0518304	3.13417	0.168	0.479
4_1_G03	1	0	0	0	0	0.0429045	0.0416438	3.13272	0.171	0.487
4_1_G04	1	0	0	0	0	0.0464221	0.0435838	2.98805	0.157	0.479
4_1_G07	1	0	0	0	0	0.0443135	0.0494492	3.01278	0.161	0.487
4_1_G09	1	0	0	0	0	0.0433089	0.0480102	3.18131	0.172	0.495
4_1_G12	1	0	1	1	0	0.044742	0.042489	2.94126	0.15	0.46
4_1_H01	1	0	1	1	0	0.0446276	0.0392062	2.9786	0.146	0.413
4_1_H03	1	0	0	0	0	0.038213	0.0409115	3.06196	0.153	0.406
4_1_H04	1	0	1	1	0	0.0465082	0.0462534	3.06557	0.161	0.473
4_1_H07	1	0	0	0	0	0.0459659	0.0427613	3.06862	0.152	0.446
4_1_H12	1	0	0	0	0	0.043002	0.043033	3.01001	0.163	0.441
5_1_A02	0	1	0	0	0	0.0644858	0.0654652	3.71532	0.155	0.503
5_1_A03	0	1	0	0	0	0.0553409	0.0590366	3.58476	0.16	0.495
5_1_A08	0	1	0	0	0	0.0641123	0.0590691	3.64524	0.163	0.5
5_1_A09	0	1	0	0	0	0.0617849	0.0665714	3.63598	0.161	0.51
5_1_A10	0	1	0	0	0	0.0577694	0.0624037	3.56696	0.151	0.479
5_1_A11	0	1	0	0	0	0.062669	0.0617278	3.61901	0.162	0.492
5_1_A12	0	1	0	0	0	0.058505	0.0622752	3.57629	0.159	0.485
5_1_B02	0	1	0	0	0	0.0657924	0.0657559	3.65818	0.166	0.496
5_1_B03	0	1	0	0	0	0.0610901	0.0712843	3.65261	0.173	0.504
5_1_B04	0	1	0	0	0	0.0609141	0.0658895	3.64362	0.168	0.502
5_1_B05	0	1	0	0	0	0.0582916	0.0616813	3.56141	0.173	0.498
5_1_B06	0	1	0	0	0	0.0677186	0.064245	3.73038	0.166	0.501
5_1_B08	0	1	0	0	0	0.0586219	0.0568398	3.47366	0.166	0.472
5_1_B10	0	1	0	0	0	0.059841	0.0625674	3.54641	0.161	0.491
5_1_B12	0	1	0	0	0	0.0693721	0.0732246	3.69487	0.159	0.507
5_1_C01	0	1	0	0	0	0.0651343	0.0569781	3.61882	0.167	0.507
5_1_C04	0	1	0	0	0	0.0602183	0.0618697	3.63148	0.163	0.494
5_1_C05	0	1	0	0	0	0.055597	0.0591935	3.46272	0.159	0.475
5_1_C06	0	1	0	0	0	0.063211	0.0663944	3.61089	0.171	0.494
5_1_C08	0	1	0	0	0	0.0667028	0.0647925	3.67553	0.17	0.512
5_1_C10	0	1	0	0	0	0.059377	0.0603001	3.56498	0.179	0.5
5_1_C11	0	1	0	0	0	0.0667185	0.069526	3.64252	0.164	0.5
5_1_C12	0	1	0	0	0	0.0611476	0.0613263	3.56252	0.157	0.489
5_1_D01	0	1	0	0	0	0.0579369	0.0615371	3.58418	0.155	0.487
5_1_D02	0	1	0	0	0	0.059553	0.0635749	3.62396	0.167	0.496
5_1_D03	0	1	0	0	0	0.0603494	0.0652071	3.66634	0.157	0.495
5_1_D08	0	1	0	0	0	0.0619398	0.0649697	3.62211	0.17	0.494
5_1_D10	0	1	0	0	0	0.0571709	0.0616526	3.61885	0.174	0.493
5_1_D11	0	1	0	0	0	0.0582411	0.0611624	3.73052	0.184	0.517
5_1_D12	0	1	0	0	0	0.0554965	0.0617803	3.54083	0.181	0.494
5_1_E01	0	1	0	0	0	0.0657131	0.0636111	3.53489	0.175	0.494
5_1_E04	0	1	0	0	0	0.0620328	0.0633149	3.59226	0.173	0.509
5_1_E05	0	1	0	0	0	0.0673306	0.0676183	3.65436	0.162	0.498
5_1_E07	0	1	0	0	0	0.0579449	0.0618299	3.61054	0.17	0.499
5_1_E11	0	1	0	0	0	0.0632544	0.0662406	3.6127	0.167	0.502
5_1_F01	0	1	0	0	0	0.0597211	0.0619254	3.58353	0.17	0.504
5_1_F02	0	1	0	0	0	0.0650722	0.0582107	3.52844	0.162	0.503
5_1_F05	0	1	0	0	0	0.0599695	0.0586299	3.56493	0.164	0.487
5_1_F07	0	1	0	0	0	0.0585688	0.0603064	3.60304	0.168	0.493
5_1_F08	0	1	0	0	0	0.0634657	0.0639643	3.60755	0.157	0.496
5_1_F10	0	1	0	0	0	0.0587452	0.0599216	3.57255	0.153	0.489
5_1_F12	0	1	0	0	0	0.0624078	0.0623736	3.57833	0.17	0.505
5_1_G01	0	1	0	0	0	0.0561235	0.0582468	3.56487	0.169	0.512
5_1_G03	0	1	0	0	0	0.0651064	0.0633343	3.62455	0.155	0.503
5_1_G04	0	1	0	0	0	0.0547481	0.0587396	3.50539	0.161	0.474
5_1_G05	0	1	0	0	0	0.0628403	0.0630779	3.54309	0.17	0.516
5_1_G06	0	1	0	0	0	0.0650857	0.061313	3.65811	0.166	0.497
5_1_G07	0	1	0	0	0	0.0640452	0.0667327	3.58932	0.164	0.507
5_1_G08	0	1	0	0	0	0.0628079	0.0650391	3.64387	0.153	0.5
5_1_G09	0	1	0	0	0	0.0621987	0.0638348	3.66513	0.168	0.502
5_1_G10	0	1	0	0	0	0.04551	0.0487182	3.52123	0.276	0.577
5_1_G12	0	1	0	0	0	0.0639535	0.0567472	3.52607	0.168	0.491
5_1_H01	0	1	0	0	0	0.0658778	0.0623119	3.67947	0.168	0.512
5_1_H02	0	1	0	0	0	0.058397	0.0627964	3.685	0.17	0.496
5_1_H03	0	1	0	0	0	0.0584925	0.0656532	3.5966	0.175	0.502
5_1_H04	0	1	0	0	0	0.0616956	0.0621962	3.60191	0.166	0.487
5_1_H05	0	1	0	0	0	0.059593	0.065642	3.61085	0.168	0.505
5_1_H06	0	1	0	0	0	0.0612569	0.0615401	3.68734	0.157	0.497
5_1_H08	0	1	0	0	0	0.0625521	0.0646752	3.62462	0.157	0.498
5_1_H10	0	1	0	0	0	0.0631547	0.0639634	3.62107	0.16	0.489
5_1_H12	0	1	0	0	0	0.0667966	0.0668317	3.70058	0.159	0.514
5_2_A04	0	1	0	1	0	0.0600933	0.0623335	3.63023	0.15	0.479	15.8333	5.75855
5_2_A05	0	1	0	1	0	0.0637132	0.0660908	3.61214	0.156	0.494	34.9424	6.72631
5_2_A06	0	1	0	1	0	0.0602217	0.0597452	3.5105	0.158	0.486	3.13253	6.63332
5_2_A07	0	1	0	1	0	0.0623388	0.0645338	3.55728	0.177	0.482	5.5053	18.8376
5_2_A08	0	1	0	1	0	0.0589892	0.0619338	3.46526	0.159	0.476	4.26557	3.66499
5_2_A09	0	1	0	1	0	0.0637644	0.0707572	3.73882	0.158	0.509	9.84821	20.3078
5_2_A11	0	1	0	1	0	0.0621287	0.063331	3.52192	0.151	0.489	42.5516	8.04954
5_2_B01	0	1	0	1	0	0.061044	0.064741	3.63017	0.164	0.5	53.2463	9.31055
5_2_B03	0	1	0	1	0	0.0659792	0.0678663	3.66665	0.157	0.487	135.101	9.59944
5_2_B04	0	1	0	1	0	0.0637106	0.0643508	3.71885	0.158	0.502	52.8031	10.5633
5_2_B05	0	1	0	1	0	0.0626244	0.0664626	3.60502	0.168	0.509	98.9902	0.176212
5_2_B07	0	1	0	1	0	0.0659477	0.066104	3.67751	0.163	0.508	3.18554	0.0268764
5_2_B08	0	1	0	1	0	0.0592807	0.0624676	3.58066	0.166	0.478	4.17969	10.5324
5_2_B09	0	1	0	1	0	0.0615942	0.0553151	3.51951	0.162	0.48	41.0079	10.2366
5_2_B10	0	1	0	1	0	0.0615028	0.060944	3.61282	0.166	0.491	7.71323	16.4286
5_2_B11	0	1	0	1	0	0.0604625	0.0641544	3.64501	0.168	0.5	7.44681	200.216
5_2_B12	0	1	0	1	0	0.0643926	0.0636735	3.62132	0.154	0.506	31.895	57.1498
5_2_C02	0	1	0	1	0	0.0663013	0.0664593	3.57594	0.165	0.501	10.9979	13.3154
5_2_C03	0	1	0	1	0	0.0631579	0.0660185	3.6873	0.161	0.509	3.69091	12.0872
5_2_C06	0	1	0	1	0	0.0576854	0.058218	3.55046	0.16	0.489	81.3846	10.926
5_2_C09	0	1	0	1	0	0.0611792	0.0636448	3.57847	0.158	0.493	2.78565	9.19861
5_2_C10	0	1	0	1	0	0.0624974	0.0665206	3.59011	0.158	0.487	7.0909	25.5365
5_2_C11	0	1	0	1	0	0.0628942	0.0621715	3.64031	0.161	0.482
5_2_C12	0	1	0	1	0	0.0561337	0.0636947	3.57115	0.178	0.503	32.2497	17.0485
5_2_D01	0	1	0	1	0	0.0570736	0.0615053	3.64989	0.166	0.481
5_2_D02	0	1	0	1	0	0.0625224	0.059866	3.66881	0.156	0.505	116.388	0.929201
5_2_D03	0	1	0	1	0	0.0668714	0.0722572	3.64418	0.162	0.509
5_2_D04	0	1	0	1	0	0.0608064	0.0638449	3.66078	0.162	0.494	40.9706	37.0788
5_2_D06	0	1	0	1	0	0.0617875	0.0634973	3.68553	0.174	0.488	134.306	82.6512
5_2_D07	0	1	0	1	0	0.0678133	0.070412	3.66223	0.167	0.51	3.25604	1.1334
5_2_D08	0	1	0	1	0	0.0621684	0.0602901	3.61268	0.164	0.5	130.143	65.4546
5_2_D09	0	1	0	1	0	0.0606826	0.0625897	3.70431	0.159	0.499	12.8779	13.823
5_2_D10	0	1	0	1	0	0.0594752	0.0635775	3.59994	0.157	0.494	3.00255	7.80417
5_2_D11	0	1	0	1	0	0.0635955	0.0674758	3.67015	0.157	0.507
5_2_D12	0	1	0	1	0	0.0644432	0.0628596	3.68709	0.162	0.489	6.75986	5.05066
5_2_E01	0	1	0	1	0	0.0400124	0.0341545	3.43737	0.208	0.445	85.2627	109.218
5_2_E02	0	1	0	1	0	0.0606122	0.0613842	3.62431	0.154	0.484
5_2_E03	0	1	0	1	0	0.0631297	0.0649321	3.61313	0.157	0.499	79.9026	11.2838
5_2_E04	0	1	0	1	0	0.0651065	0.0655027	3.59083	0.164	0.496	9.32161	19.5079
5_2_E05	0	1	0	1	0	0.0391618	0.0466976	3.50651	0.227	0.581	1.91161	3.31486
5_2_E07	0	1	0	1	0	0.0638267	0.0629748	3.69105	0.155	0.5	171.218	121.876
5_2_E09	0	1	0	1	0	0.060289	0.0620972	3.63925	0.157	0.487
5_2_E10	0	1	0	1	0	0.0602092	0.0628533	3.60516	0.162	0.506
5_2_E12	0	1	0	1	0	0.0602623	0.062081	3.61818	0.142	0.489	105.87	0.141423
5_2_F03	0	1	0	1	0	0.0574549	0.0597841	3.60784	0.162	0.478	17.0426	9.86723
5_2_F04	0	1	0	1	0	0.0668623	0.0702613	3.63658	0.157	0.503	25.4674	9.92415
5_2_F05	0	1	0	1	0	0.0676965	0.0680478	3.72274	0.161	0.507	25.4679	73.0821
5_2_F06	0	1	0	1	0	0.0615647	0.0632872	3.67152	0.161	0.494	18.7711	12.1875
5_2_F07	0	1	0	1	0	0.0613059	0.0630648	3.61209	0.148	0.484	113.382	32.9065
5_2_F10	0	1	0	1	0	0.0630271	0.0635644	3.63021	0.158	0.497	8.5435	9.26676
5_2_F11	0	1	0	1	0	0.0630395	0.0576972	3.59242	0.162	0.48	36.2002	24.2455
5_2_F12	0	1	0	1	0	0.0643052	0.0654593	3.66012	0.166	0.503	9.0465	23.1175
5_2_G05	0	1	0	1	0	0.0642808	0.0628643	3.65277	0.167	0.511	46.8975	1.17759
5_2_G06	0	1	0	1	0	0.060299	0.0657432	3.68132	0.16	0.505	10.7158	18.4798
5_2_G08	0	1	0	1	0	0.0674583	0.0682485	3.73769	0.157	0.511	5.12316	12.6683
5_2_G09	0	1	0	1	0	0.0595327	0.0602958	3.59476	0.148	0.489	11.3827	44.5739
5_2_G10	0	1	0	1	0	0.0535859	0.0569861	3.39083	0.156	0.466	4.00002	9.51013
5_2_G11	0	1	0	1	0	0.0647135	0.06589	3.70253	0.161	0.508	2.03376	4.20736
5_2_G12	0	1	0	1	0	0.0676108	0.0650155	3.67645	0.165	0.498	7.52062	6.639
5_2_H02	0	1	0	1	0	0.0600295	0.0613062	3.57889	0.168	0.509	8.73491	46.5772
5_2_H03	0	1	0	1	0	0.0615925	0.0634687	3.65792	0.161	0.514	1.3744	3.22327
5_2_H04	0	1	0	1	0	0.0648595	0.0621884	3.66015	0.163	0.515	6.13308	3.88456
5_2_H06	0	1	0	1	0	0.0551095	0.0583263	3.53065	0.153	0.487	127.844	24.2478
5_2_H07	0	1	0	1	0	0.0609421	0.0650569	3.68725	0.164	0.493	4.23786	9.46202
5_2_H08	0	1	0	1	0	0.057021	0.062108	3.59502	0.171	0.503	44.299	19.6987
5_2_H09	0	1	0	1	0	0.0667224	0.0650218	3.70225	0.156	0.507	3.2353	9.84661
5_2_H10	0	1	0	1	0	0.0554288	0.0382494	3.36514	0.153	0.456	6.48521	9.48848
5_2_H11	0	1	0	1	0	0.0616349	0.0630415	3.67509	0.173	0.518	103.49	123.784
5_3_A02	0	1	0	1	0	0.0670778	0.0676275	3.65341	0.166	0.516
5_3_A03	0	1	0	1	0	0.0624703	0.060199	3.66238	0.153	0.487
5_3_A04	0	1	0	1	0	0.0633857	0.0628827	3.69378	0.181	0.5
5_3_A05	0	1	0	1	0	0.0687646	0.0712267	3.70817	0.155	0.504
5_3_A06	0	1	0	1	0	0.0623054	0.0640097	3.6165	0.159	0.487
5_3_A07	0	1	0	1	0	0.0711073	0.0691995	3.65703	0.159	0.516
5_3_A10	0	1	0	1	0	0.065522	0.0653992	3.70911	0.153	0.509
5_3_A11	0	1	0	1	0	0.0602183	0.0592365	3.63815	0.165	0.49
5_3_A12	0	1	0	1	0	0.0578754	0.0609066	3.59215	0.162	0.492
5_3_B03	0	1	0	1	0	0.0717394	0.0657965	3.69818	0.158	0.512
5_3_B05	0	1	0	1	0	0.0641976	0.0643987	3.65871	0.155	0.502
5_3_B06	0	1	0	1	0	0.0668324	0.0690199	3.71062	0.148	0.496
5_3_B07	0	1	0	1	0	0.0593506	0.0641823	3.60852	0.164	0.5
5_3_B08	0	1	0	1	0	0.0687635	0.0677555	3.76645	0.162	0.492
5_3_B09	0	1	0	1	0	0.0630121	0.0662977	3.82175	0.162	0.507
5_3_B10	0	1	0	1	0	0.0596184	0.0638319	3.60252	0.164	0.497
5_3_B12	0	1	0	1	0	0.0638685	0.0681392	3.59913	0.157	0.492
5_3_C01	0	1	0	1	0	0.0656345	0.0663621	3.67456	0.163	0.496
5_3_C03	0	1	0	1	0	0.0641416	0.0655971	3.61053	0.156	0.506
5_3_C04	0	1	0	1	0	0.0685752	0.0643756	3.72752	0.146	0.484
5_3_C05	0	1	0	1	0	0.066736	0.0645135	3.69592	0.152	0.515
5_3_C06	0	1	0	1	0	0.0643879	0.0663887	3.84658	0.157	0.509
5_3_C07	0	1	0	1	0	0.0605031	0.0614955	3.58295	0.167	0.5
5_3_C09	0	1	0	1	0	0.0655098	0.0645615	3.69828	0.162	0.496
5_3_C10	0	1	0	1	0	0.0695576	0.0680489	3.72886	0.157	0.513
5_3_C11	0	1	0	1	0	0.0584683	0.063461	3.69294	0.155	0.498
5_3_D02	0	1	0	1	0	0.0595137	0.0598328	3.62492	0.168	0.496
5_3_D06	0	1	0	1	0	0.060345	0.06004	3.5326	0.159	0.514
5_3_D07	0	1	0	1	0	0.0598083	0.0609199	3.63255	0.153	0.496
5_3_D08	0	1	0	1	0	0.059981	0.0649246	3.67783	0.166	0.509
5_3_D09	0	1	0	1	0	0.0573316	0.0570311	3.54384	0.155	0.483
5_3_D10	0	1	0	1	0	0.0623431	0.0639338	3.54276	0.166	0.494
5_3_D11	0	1	0	1	0	0.0583564	0.0593636	3.50262	0.155	0.483
5_3_D12	0	1	0	1	0	0.0677949	0.0682348	3.67603	0.155	0.507
5_3_E01	0	1	0	1	0	0.068279	0.0595628	3.64752	0.163	0.514
5_3_E03	0	1	0	1	0	0.0644055	0.0582876	3.68102	0.163	0.499
5_3_E04	0	1	0	1	0	0.0622514	0.0636715	3.69215	0.157	0.494
5_3_E06	0	1	0	1	0	0.0625714	0.0561553	3.77561	0.16	0.507
5_3_E07	0	1	0	1	0	0.0612516	0.06465	3.65169	0.166	0.507
5_3_E08	0	1	0	1	0	0.0555868	0.0592449	3.56422	0.158	0.493
5_3_E10	0	1	0	1	0	0.060748	0.06444	3.57047	0.144	0.493
5_3_E11	0	1	0	1	0	0.0647453	0.0656031	3.66538	0.164	0.511
5_3_F01	0	1	0	1	0	0.058678	0.0641006	3.62672	0.168	0.495
5_3_F02	0	1	0	1	0	0.0595868	0.0618372	3.63092	0.166	0.507
5_3_F03	0	1	0	1	0	0.0687991	0.0531362	3.7259	0.173	0.52
5_3_F04	0	1	0	1	0	0.0579401	0.0623404	3.71789	0.173	0.494
5_3_F05	0	1	0	1	0	0.0611313	0.0667282	3.65456	0.166	0.502
5_3_F07	0	1	0	1	0	0.068653	0.0655115	3.77003	0.162	0.525
5_3_F08	0	1	0	1	0	0.0663301	0.059626	3.66173	0.161	0.508
5_3_F12	0	1	0	1	0	0.0460109	0.0477638	3.61208	0.157	0.485
5_3_G01	0	1	0	1	0	0.0633166	0.0648353	3.66769	0.162	0.505
5_3_G02	0	1	0	1	0	0.0616908	0.0641399	3.67424	0.162	0.514
5_3_G03	0	1	0	1	0	0.0632203	0.0640637	3.69999	0.162	0.502
5_3_G04	0	1	0	1	0	0.0695714	0.0720912	3.77001	0.161	0.52
5_3_G06	0	1	0	1	0	0.0647497	0.0622947	3.6391	0.163	0.484
5_3_H02	0	1	0	1	0	0.068245	0.0669082	3.79603	0.168	0.514
5_3_H06	0	1	0	1	0	0.0586602	0.0610211	3.63906	0.162	0.485
5_3_H08	0	1	0	1	0	0.0693117	0.0679032	3.70308	0.158	0.506
6_1_A08	0	1	0	1	0	0.0336469	0.0375106	3.42061	0.204	0.48	161.155	160.971
6_1_A11	0	1	0	1	0	0.0598698	0.0586676	3.5611	0.157	0.502	192.383	143.784
6_1_B03	0	1	0	1	0	0.0288568	0.0330733	3.46474	0.267	0.586	208.914	170.084
6_1_B04	0	1	0	1	0	0.042377	0.0438678	3.5704	0.185	0.494	188.544	130.486
6_1_B09	0	1	0	1	0	0.0603835	0.0603433	3.49453	0.157	0.483	135.561	141.619
6_1_B11	0	1	0	1	0	0.0703073	0.0631261	3.75918	0.159	0.492	215.325	181.654
6_1_C03	0	1	0	1	0	0.0581745	0.0578785	3.62291	0.179	0.499	116.074	122.846
6_1_C05	0	1	0	1	0	0.0568109	0.0657131	3.63566	0.165	0.493	148.37	160.597
6_1_C09	0	1	0	1	0	0.0604471	0.0620683	3.54721	0.148	0.483	184.294	178.123
6_1_C12	0	1	0	1	0	0.0627526	0.0575826	3.67645	0.151	0.491	158.919	152.953
6_1_D04	0	1	0	1	0	0.0650654	0.0663843	3.70688	0.157	0.507	126.525	132.047
6_1_D05	0	1	0	1	0	0.0559448	0.0619217	3.52956	0.147	0.482	157.428	154.192
6_1_D07	0	1	0	1	0	0.0623942	0.0555629	3.53823	0.161	0.498	186.244	152.154
6_1_D12	0	1	0	1	0	0.0565107	0.0570119	3.46981	0.15	0.484	136.262	138.189
6_1_E01	0	1	0	1	0	0.062974	0.0653704	3.83422	0.168	0.523	220.269	192.463
6_1_E03	0	1	0	1	0	0.0465441	0.0467924	3.25305	0.232	0.538	161.959	154.297
6_1_E11	0	1	0	1	0	0.0585043	0.0566131	3.6011	0.148	0.481	184.483	148.207
6_1_F07	0	1	0	1	0	0.0408316	0.0396265	3.5646	0.212	0.489	211.478	157.744
6_1_F08	0	1	0	1	0	0.0617603	0.0643209	3.62929	0.162	0.485	192.791	153.044
6_1_G01	0	1	0	1	0	0.0646885	0.0656425	3.76787	0.162	0.491	155.832	147.631
6_1_G03	0	1	0	1	0	0.0622606	0.0640185	3.62588	0.163	0.496	184.484	141.832
6_1_G04	0	1	0	1	0	0.0388491	0.0373521	3.46191	0.243	0.554	150.932	138.166
6_1_G06	0	1	0	1	0	0.0647323	0.0620262	3.74298	0.166	0.498	201.47	194.785
6_1_G07	0	1	0	1	0	0.0596507	0.0592186	3.56545	0.16	0.487	170.457	164.466
6_1_G08	0	1	0	1	0	0.0596074	0.0649184	3.66784	0.166	0.509	177.735	138.304
6_1_G09	0	1	0	1	0	0.0618819	0.0654833	3.64419	0.175	0.514	157.453	124.307
6_1_G10	0	1	0	1	0	0.0625404	0.0643159	3.69154	0.164	0.51	278.586	286.97
6_1_G12	0	1	0	1	0	0.0573095	0.0635322	3.72316	0.179	0.5	115.046	121.642
6_1_H03	0	1	0	1	0	0.0589305	0.0610476	3.63825	0.172	0.484	187.092	180.812
6_1_H04	0	1	0	1	0	0.0576362	0.061929	3.58515	0.174	0.502	162.389	154.951
6_1_H08	0	1	0	1	0	0.0426354	0.0436045	3.46194	0.219	0.54	164.264	155.46
6_2_A03	0	1	0	1	10	0.056653	0.05959	3.54591	0.151	0.465	21.579	0.0738913
6_2_A07	0	1	0	1	10	0.0620824	0.0615318	3.52219	0.144	0.485	23.8628	0.320923
6_2_B01	0	1	0	1	10	0.0608613	0.0593127	3.56785	0.15	0.482	96.7087	2.87197
6_2_C03	0	1	0	1	10	0.038505	0.0363819	3.47065	0.185	0.509	139.896	27.6748
6_2_C04	0	1	0	1	10	0.0467508	0.046853	3.51854	0.186	0.487	185.192	214.351
6_2_C06	0	1	0	1	10	0.0339688	0.0331976	3.49586	0.252	0.534	1.64425	3.77488
6_2_C07	0	1	0	1	10	0.0610109	0.0580496	3.55189	0.137	0.478	42.0548	15.4008
6_2_D04	0	1	0	1	10	0.0379434	0.0390017	3.47823	0.186	0.496	121.54	90.8071
6_2_D09	0	1	0	1	10	0.0607535	0.0551395	3.55418	0.146	0.488	55.026	11.4055
6_2_D10	0	1	0	1	10	0.0431851	0.0412187	3.48399	0.188	0.518	62.9933	0.29657
6_2_F09	0	1	0	1	10	0.0608014	0.0588426	3.49802	0.151	0.49	160.66	168.106
6_2_F11	0	1	0	1	10	0.0587196	0.0575441	3.47688	0.159	0.5	69.0844	5.73037
6_2_F12	0	1	0	1	10	0.0651047	0.0635336	3.63286	0.151	0.496	80.0976	43.3572
6_2_G04	0	1	0	1	10	0.0571457	0.0627558	3.62387	0.146	0.509	50.6161	37.9564
6_2_G06	0	1	0	1	10	0.0605557	0.0616511	3.5537	0.139	0.494
6_2_G08	0	1	0	1	10	0.0622762	0.0645542	3.54076	0.184	0.535	121.21	106.613
6_2_G11	0	1	0	1	10	0.0531634	0.0578756	3.42325	0.134	0.489	140.219	88.1928
6_2_H06	0	1	0	1	10	0.0318026	0.0300029	3.47368	0.234	0.524
6_2_H10	0	1	0	1	10	0.0631373	0.0651726	3.56591	0.153	0.527	18.5757	12.2635
7_1_A02	1	0	1	1	10	0.044601	0.0465414	3.04283	0.168	0.482
7_1_A03	1	0	1	1	10	0.0380292	0.0416054	2.94421	0.137	0.451
7_1_A04	1	0	0	0	0	0.040436	0.0379287	3.03929	0.132	0.418
7_1_A05	1	0	1	1	10	0.0357676	0.0364253	2.72341	0.139	0.431
7_1_A06	1	0	0	0	0	0.0423102	0.046353	3.10695	0.157	0.476
7_1_A07	1	0	0	0	0	0.0414953	0.0418058	3.00127	0.141	0.466
7_1_A08	1	0	0	0	0	0.0439091	0.0445114	3.06634	0.155	0.482
7_1_A12	1	0	0	0	0	0.0418933	0.0418533	2.99992	0.147	0.461
7_1_B01	1	0	0	0	0	0.0454742	0.0471497	3.06276	0.157	0.485
7_1_B02	1	0	0	0	0	0.0424752	0.0453213	3.04013	0.155	0.502
7_1_B03	1	0	0	0	0	0.0442236	0.0456813	3.14732	0.152	0.49
7_1_B04	1	0	1	1	10	0.046996	0.0485522	3.1611	0.159	0.507
7_1_B05	1	0	1	1	10	0.0431837	0.0441496	3.05932	0.163	0.466
7_1_B06	1	0	1	1	10	0.0386168	0.0415729	3.02231	0.158	0.479
7_1_B07	1	0	0	0	0	0.042346	0.0462361	3.00965	0.157	0.48
7_1_B08	1	0	1	1	10	0.0431813	0.0456852	3.06133	0.182	0.486
7_1_B09	1	0	0	0	0	0.0373382	0.0401053	3.06256	0.16	0.465
7_1_B11	1	0	1	1	10	0.0434886	0.0436904	3.06773	0.133	0.456
7_1_C01	1	0	1	1	10	0.0306339	0.0271769	2.88437	0.135	0.405
7_1_C02	1	0	1	1	10	0.03822	0.0373365	2.70861	0.141	0.437
7_1_C03	1	0	0	0	0	0.0434804	0.0474004	3.11805	0.167	0.498
7_1_C04	1	0	0	0	0	0.0433676	0.0436646	3.07608	0.159	0.473
7_1_C05	1	0	0	0	0	0.0431026	0.0405452	3.01625	0.15	0.464
7_1_C06	1	0	1	1	10	0.0423615	0.0437428	3.0963	0.173	0.479
7_1_C07	1	0	1	1	10	0.045721	0.047055	3.11271	0.158	0.498
7_1_C08	1	0	1	1	10	0.0407111	0.0447905	3.0161	0.144	0.456
7_1_C10	1	0	0	0	0	0.0399152	0.0404248	2.94201	0.141	0.458
7_1_C11	1	0	0	0	0	0.0456462	0.050502	3.13449	0.163	0.509
7_1_C12	1	0	1	1	10	0.0475101	0.0485186	2.92885	0.16	0.499
7_1_D01	1	0	1	1	10	0.0411723	0.0448732	2.94465	0.166	0.471
7_1_D02	1	0	1	1	10	0.0415266	0.0442768	2.92252	0.15	0.476
7_1_D03	1	0	0	0	0	0.0328211	0.0311569	2.94825	0.144	0.403
7_1_D05	1	0	1	1	10	0.0288825	0.0320783	2.91045	0.144	0.42
7_1_D06	1	0	1	1	10	0.0337291	0.0333908	2.93617	0.137	0.409
7_1_D07	1	0	1	1	10	0.0399069	0.0442217	2.94888	0.155	0.467
7_1_D08	1	0	1	1	10	0.0465842	0.0421065	2.99415	0.157	0.468
7_1_D09	1	0	0	0	0	0.0414735	0.0441618	2.91618	0.152	0.461
7_1_D11	1	0	1	1	10	0.0312445	0.0318317	2.93728	0.157	0.409
7_1_D12	1	0	0	0	0	0.0448049	0.0428969	3.03189	0.16	0.491
7_1_E01	1	0	0	0	0	0.0428586	0.0386989	3.05634	0.143	0.444
7_1_E02	1	0	0	0	0	0.043187	0.0470256	3.06694	0.158	0.475
7_1_E04	1	0	1	1	10	0.0457688	0.0475768	3.13638	0.153	0.483
7_1_E06	1	0	1	1	10	0.0310076	0.0303326	2.90247	0.153	0.404
7_1_E08	1	0	1	1	10	0.0434307	0.0497743	3.0778	0.174	0.503
7_1_E10	1	0	1	1	10	0.0442938	0.0461427	3.07512	0.168	0.478
7_1_E11	1	0	1	1	10	0.0354961	0.0395627	2.79139	0.155	0.429
7_1_E12	1	0	1	1	10	0.0420237	0.0435063	3.01015	0.163	0.478
7_1_F01	1	0	1	1	10	0.0449829	0.0472873	3.1648	0.166	0.493
7_1_F02	1	0	0	0	0	0.04355	0.0439766	2.82423	0.151	0.437
7_1_F03	1	0	1	1	10	0.0407628	0.0416002	2.90978	0.164	0.466
7_1_F04	1	0	1	1	10	0.0434115	0.0461881	3.02452	0.164	0.495
7_1_F08	1	0	1	1	10	0.038171	0.035424	2.77792	0.146	0.452
7_1_F09	1	0	0	0	0	0.0389749	0.0443881	3.05702	0.152	0.472
7_1_F10	1	0	0	0	0	0.0466099	0.0415457	3.02286	0.155	0.458
7_1_F11	1	0	1	1	10	0.0402987	0.0392472	3.0159	0.144	0.412
7_1_F12	1	0	0	0	0	0.0429438	0.0439763	3.1582	0.173	0.465
7_1_G02	1	0	1	1	10	0.0424109	0.0454396	3.12963	0.179	0.486
7_1_G03	1	0	0	0	0	0.032118	0.0339008	2.96911	0.153	0.406
7_1_G04	1	0	1	1	10	0.0316785	0.0328404	2.94317	0.142	0.423
7_1_G06	1	0	1	1	10	0.0397971	0.0423045	3.00433	0.17	0.456
7_1_G07	1	0	1	1	10	0.0389307	0.0422152	2.93794	0.161	0.464
7_1_G09	1	0	0	0	0	0.0438391	0.0442689	3.03235	0.155	0.494
7_1_G10	1	0	0	0	0	0.0434458	0.0424093	2.98217	0.164	0.473
7_1_G11	1	0	1	1	10	0.0424417	0.0432555	2.99536	0.155	0.459
7_1_G12	1	0	1	1	10	0.0381432	0.0422754	2.85225	0.159	0.448
7_1_H01	1	0	0	0	0	0.0344188	0.037507	2.93131	0.148	0.42
7_1_H02	1	0	1	1	10	0.0398749	0.0417791	3.04383	0.163	0.466
7_1_H03	1	0	1	1	10	0.0413703	0.044683	3.04033	0.153	0.467
7_1_H04	1	0	0	0	0	0.0437186	0.0485238	3.12122	0.171	0.486
7_1_H05	1	0	1	1	10	0.0454817	0.0432306	2.98066	0.148	0.461
7_1_H07	1	0	1	1	10	0.0376748	0.0371408	2.90683	0.148	0.431
7_1_H08	1	0	1	1	10	0.0326238	0.0370397	2.88063	0.161	0.436
7_1_H09	1	0	1	1	10	0.0373082	0.0395059	2.91688	0.148	0.464
7_1_H10	1	0	0	0	0	0.0460188	0.0446228	2.96	0.174	0.481
7_1_H11	1	0	1	1	10	0.0437115	0.0438172	3.06379	0.171	0.475
7_1a_A02	0	0	0	1	0						59.8579	0.894598
7_1a_A07	0	0	0	1	0						6.73846	1.84751
7_1a_A08	0	0	0	1	0						6.41501	17.5358
7_1a_A09	0	0	0	1	0						49.3225	6.68886
7_1a_B01	0	0	0	1	0						19.7884	13.9892
7_1a_B03	0	0	0	1	0						40.2566	0.351838
7_1a_B06	0	0	0	1	0						62.5736	13.6764
7_1a_B07	0	0	0	1	0						4.80735	16.3316
7_1a_B09	0	0	0	1	0						30.1887	0.958613
7_1a_B10	0	0	0	1	0						7.35697	24.0861
7_1a_C04	0	0	0	1	0						2.44027	3.12306
7_1a_C05	0	0	0	1	0						6.03683	11.7448
7_1a_C07	0	0	0	1	0						8.83674	7.57909
7_1a_C09	0	0	0	1	0						7.14143	9.29583
7_1a_C10	0	0	0	1	0						3.8376	0.312039
7_1a_D03	0	0	0	1	0						76.5217	21.055
7_1a_D04	0	0	0	1	0						12.4161	16.8325
7_1a_D06	0	0	0	1	0						14.3658	34.7049
7_1a_D07	0	0	0	1	0						17.5031	24.2961
7_1a_D08	0	0	0	1	0						78.9207	0.368198
7_1a_D09	0	0	0	1	0						8.57771	0.167528
7_1a_D11	0	0	0	1	0						2.96617	3.83201
7_1a_D12	0	0	0	1	0						19.249	16.0795
7_1a_E01	0	0	0	1	0						39.5192	17.0263
7_1a_E05	0	0	0	1	0						85.045	42.9674
7_1a_E06	0	0	0	1	0						13.7851	1.28328
7_1a_E07	0	0	0	1	0						66.0792	17.1338
7_1a_E08	0	0	0	1	0						11.376	11.22
7_1a_E09	0	0	0	1	0						19.4279	0.410367
7_1a_F01	0	0	0	1	0						16.6857	0.369078
7_1a_F03	0	0	0	1	0						4.36769	15.8211
7_1a_F04	0	0	0	1	0						6.85985	6.94348
7_1a_F05	0	0	0	1	0						68.9893	1.26232
7_1a_F06	0	0	0	1	0						58.5654	11.7316
7_1a_F09	0	0	0	1	0						15.4519	0.029496
7_1a_F10	0	0	0	1	0						55.9857	12.3166
7_1a_G04	0	0	0	1	0						1.40904	1.17677
7_1a_G05	0	0	0	1	0						4.51674	1.48467
7_1a_G06	0	0	0	1	0						4.36673	15.0426
7_1a_G07	0	0	0	1	0						46.513	0
7_1a_G10	0	0	0	1	0						26.5563	13.4217
7_1a_H03	0	0	0	1	0						3.26056	7.00229
7_1a_H04	0	0	0	1	0						58.3545	7.76417
7_1a_H05	0	0	0	1	0						13.4219	15.3074
7_1a_H06	0	0	0	1	0						71.035	12.3952
7_1a_H09	0	0	0	1	0						12.6185	8.27934
7_1a_H10	0	0	0	1	0						17.5152	9.67099
7_2_A01	1	0	0	0	0	0.0433601	0.0447642	3.07989	0.15	0.478
7_2_A02	1	0	1	1	0	0.0448722	0.0431271	2.91273	0.155	0.477
7_2_A03	1	0	0	0	0	0.0451682	0.0438467	3.10555	0.157	0.474
7_2_A04	1	0	1	1	0	0.0404568	0.0410781	2.91015	0.146	0.453
7_2_A05	1	0	1	1	0	0.0418772	0.0424922	3.04526	0.159	0.484
7_2_A06	1	0	1	1	0	0.039576	0.0421125	2.80583	0.156	0.465
7_2_A07	1	0	0	0	0	0.0432443	0.0407121	3.00844	0.163	0.456
7_2_A09	1	0	1	1	0	0.0412163	0.0442698	2.79304	0.163	0.465
7_2_A11	1	0	0	0	0	0.0302077	0.0326065	2.57602	0.14	0.389
7_2_A12	1	0	1	1	0	0.0426153	0.0442054	2.8175	0.172	0.475
7_2_B01	1	0	1	1	0	0.0431749	0.0397326	3.05147	0.155	0.459
7_2_B03	1	0	0	0	0	0.0403127	0.0418222	2.98893	0.165	0.466
7_2_B04	1	0	0	0	0	0.0426287	0.0392787	3.01014	0.161	0.466
7_2_B05	1	0	1	1	0	0.0398814	0.0407906	2.99662	0.152	0.463
7_2_B07	1	0	0	0	0	0.035116	0.0401575	2.83593	0.173	0.431
7_2_B09	1	0	1	1	0	0.0402389	0.0391531	2.9463	0.157	0.453
7_2_B10	1	0	0	0	0	0.0326788	0.0303909	2.90029	0.146	0.415
7_2_B12	1	0	1	1	0	0.0444033	0.0435531	2.99221	0.171	0.487
7_2_C01	1	0	0	0	0	0.0357529	0.0353936	2.5084	0.142	0.424
7_2_C03	1	0	1	1	0	0.0401405	0.0417052	2.97872	0.175	0.47
7_2_C04	1	0	1	1	0	0.0454614	0.0446938	3.05151	0.168	0.487
7_2_C05	1	0	1	1	0	0.0400124	0.0456429	2.95666	0.155	0.413
7_2_C06	1	0	1	1	0	0.0419092	0.0443934	3.1389	0.173	0.484
7_2_C07	1	0	1	1	0	0.0425694	0.0466315	3.00345	0.174	0.482
7_2_C08	1	0	1	1	0	0.0471716	0.0466465	3.12304	0.174	0.487
7_2_C10	1	0	1	1	0	0.0371857	0.0397751	2.93987	0.154	0.445
7_2_C11	1	0	0	0	0	0.0305272	0.0313337	2.89851	0.148	0.376
7_2_C12	1	0	0	0	0	0.0418196	0.046656	3.10021	0.178	0.488
7_2_D01	1	0	1	1	0	0.0467353	0.048649	3.02706	0.151	0.453
7_2_D02	1	0	1	1	0	0.0398522	0.0401163	2.85597	0.147	0.442
7_2_D03	1	0	1	1	0	0.0379156	0.0391724	2.70277	0.151	0.446
7_2_D05	1	0	1	1	0	0.0427922	0.0466315	3.14541	0.179	0.483
7_2_D06	1	0	0	0	0	0.0437916	0.042617	3.06348	0.166	0.477
7_2_D07	1	0	0	0	0	0.0413527	0.0412122	2.99655	0.164	0.466
7_2_D09	1	0	1	1	0	0.0481379	0.0471196	2.98546	0.167	0.48
7_2_D10	1	0	1	1	0	0.0486977	0.040535	2.84816	0.152	0.461
7_2_D11	1	0	1	1	0	0.0506075	0.0492166	3.09483	0.165	0.496
7_2_E01	1	0	0	0	0	0.0405256	0.039536	2.87758	0.159	0.451
7_2_E02	1	0	1	1	0	0.0491342	0.0490864	3.17206	0.175	0.507
7_2_E05	1	0	1	1	0	0.0422154	0.0429439	3.00264	0.165	0.472
7_2_E06	1	0	1	1	0	0.0382735	0.038202	2.51687	0.137	0.413
7_2_E07	1	0	1	1	0	0.0423395	0.042713	3.02987	0.159	0.476
7_2_E08	1	0	1	1	0	0.0416538	0.0413761	3.06429	0.168	0.466
7_2_E09	1	0	1	1	0	0.0418643	0.0445173	3.0211	0.159	0.483
7_2_E11	1	0	1	1	0	0.0376271	0.0408278	2.95952	0.157	0.445
7_2_E12	1	0	1	1	0	0.0418215	0.0431891	3.02366	0.169	0.482
7_2_F01	1	0	1	1	0	0.0384707	0.0368149	2.90099	0.162	0.451
7_2_F02	1	0	1	1	0	0.0290965	0.0295165	2.94826	0.157	0.412
7_2_F03	1	0	1	1	0	0.042861	0.0436172	3.10614	0.178	0.496
7_2_F04	1	0	1	1	0	0.0338673	0.0390173	2.91603	0.153	0.412
7_2_F06	1	0	0	0	0	0.0386302	0.0387741	2.67589	0.148	0.443
7_2_F07	1	0	0	0	0	0.048233	0.043959	3.06597	0.173	0.476
7_2_F08	1	0	1	1	0	0.042013	0.040657	2.99764	0.163	0.457
7_2_F09	1	0	1	1	0	0.0386792	0.0436989	2.83209	0.163	0.465
7_2_F10	1	0	1	1	0	0.042438	0.0446504	3.0243	0.159	0.483
7_2_F11	1	0	1	1	0	0.0453981	0.0525462	3.18165	0.185	0.489
7_2_F12	1	0	1	1	0	0.0428499	0.0464918	3.08151	0.17	0.501
7_2_G02	1	0	1	1	0	0.0398411	0.0405084	3.01615	0.157	0.463
7_2_G03	1	0	1	1	0	0.0401408	0.0423215	3.01506	0.16	0.436
7_2_G04	1	0	0	0	0	0.0483992	0.0476486	3.01192	0.144	0.464
7_2_G05	1	0	0	0	0	0.0496804	0.0460562	3.13499	0.168	0.476
7_2_G07	1	0	1	1	0	0.0426174	0.0452179	3.01786	0.178	0.485
7_2_G08	1	0	1	1	0	0.0466936	0.0458913	3.11496	0.164	0.503
7_2_G11	1	0	1	1	0	0.0427409	0.0382406	2.93463	0.164	0.471
7_2_G12	1	0	1	1	0	0.0439933	0.0464457	3.09435	0.167	0.486
7_2_H02	1	0	0	0	0	0.0437482	0.0444457	3.03635	0.157	0.474
7_2_H03	1	0	0	0	0	0.0403514	0.0407971	2.97991	0.155	0.472
7_2_H04	1	0	1	1	0	0.047777	0.0463524	3.09164	0.165	0.495
7_2_H05	1	0	0	0	0	0.042585	0.0433482	3.05966	0.17	0.483
7_2_H06	1	0	1	1	0	0.0428647	0.0409617	3.09287	0.161	0.479
7_2_H07	1	0	0	0	0	0.0437587	0.0451733	3.10655	0.16	0.505
7_2_H08	1	0	0	0	0	0.0423195	0.0385397	3.01812	0.153	0.47
7_2_H10	1	0	1	1	0	0.0470748	0.0480863	3.09266	0.159	0.5
7_2_H11	1	0	1	1	0	0.0380546	0.0404687	2.9238	0.164	0.466
7_2_H12	1	0	1	1	0	0.0423708	0.0440955	3.09012	0.163	0.487
7_2a_A08	0	0	0	1	10						118.658	117.365
7_2a_A09	0	0	0	1	10						179.552	137.542
7_2a_A11	0	0	0	1	10						172.789	138.639
7_2a_A12	0	0	0	1	10						187.726	161.9
7_2a_B01	0	0	0	1	10						207.188	160.139
7_2a_B02	0	0	0	1	10						187.082	133.28
7_2a_B04	0	0	0	1	10						231.676	164.966
7_2a_B05	0	0	0	1	10						206.596	141.382
7_2a_B06	0	0	0	1	10						220.374	209.562
7_2a_B09	0	0	0	1	10						188.326	137.986
7_2a_B10	0	0	0	1	10						197.114	166.67
7_2a_B11	0	0	0	1	10						205.322	156.438
7_2a_B12	0	0	0	1	10						200.914	170.839
7_2a_C02	0	0	0	1	10						174.73	141.231
7_2a_C03	0	0	0	1	10						157.347	148.168
7_2a_C04	0	0	0	1	10						206.452	146.975
7_2a_C08	0	0	0	1	10						201.287	140.157
7_2a_C09	0	0	0	1	10						177.786	119.168
7_2a_C11	0	0	0	1	10						201.394	157.263
7_2a_C12	0	0	0	1	10						195.951	156.557
7_2a_D01	0	0	0	1	10						231.538	170.761
7_2a_D03	0	0	0	1	10						232.074	228.44
7_2a_D05	0	0	0	1	10						210.913	144.674
7_2a_D06	0	0	0	1	10						185.582	129.126
7_2a_D07	0	0	0	1	10						228.465	171.229
7_2a_D08	0	0	0	1	10						237.703	201.555
7_2a_D10	0	0	0	1	10						163.956	111.315
7_2a_D11	0	0	0	1	10						220.456	171.941
7_2a_D12	0	0	0	1	10						217.444	179.037
7_2a_E01	0	0	0	1	10						157.644	101.045
7_2a_E03	0	0	0	1	10						147.362	134.642
7_2a_E06	0	0	0	1	10						134.171	105.437
7_2a_E10	0	0	0	1	10						224.116	182.49
7_2a_E11	0	0	0	1	10						185.331	164.94
7_2a_E12	0	0	0	1	10						201.599	179.427
7_2a_F01	0	0	0	1	10						184.244	160.967
7_2a_F04	0	0	0	1	10						207.584	181.837
7_2a_F05	0	0	0	1	10						188.911	96.6715
7_2a_F08	0	0	0	1	10						196.455	158.503
7_2a_F10	0	0	0	1	10						202.811	143.875
7_2a_F11	0	0	0	1	10						177.498	139.869
7_2a_G02	0	0	0	1	10						210.432	153.26
7_2a_G04	0	0	0	1	10						211.525	167.618
7_2a_G06	0	0	0	1	10						212.058	166.893
7_2a_G07	0	0	0	1	10						213.428	179.198
7_2a_G08	0	0	0	1	10						188.898	183.681
7_2a_G11	0	0	0	1	10						161.158	131.441
7_2a_H02	0	0	0	1	10						238.173	240.972
7_2a_H03	0	0	0	1	10						191.682	197.407
7_2a_H04	0	0	0	1	10						177.548	169.016
7_2a_H09	0	0	0	1	10						219.933	148.221
7_2a_H10	0	0	0	1	10						185.849	175.458
7_3_A03	1	0	1	1	10	0.0459388	0.0430349	3.12207	0.163	0.474
7_3_A04	1	0	1	1	10	0.0430776	0.040943	2.92671	0.163	0.481
7_3_A05	1	0	1	1	10	0.0461507	0.0438803	3.07057	0.154	0.478
7_3_A06	1	0	1	1	10	0.0434959	0.0410835	2.93803	0.155	0.48
7_3_A07	1	0	0	0	0	0.0398754	0.0404075	2.9076	0.171	0.46
7_3_A08	1	0	0	0	0	0.0363079	0.0384638	2.75892	0.161	0.42
7_3_A09	1	0	0	0	0	0.0339611	0.039836	2.97619	0.154	0.405
7_3_A10	1	0	1	1	10	0.0429623	0.0431539	3.06296	0.162	0.479
7_3_A12	1	0	1	1	10	0.0411409	0.0417742	2.85947	0.157	0.472
7_3_B02	1	0	0	0	0	0.0416845	0.0409568	2.76154	0.157	0.478
7_3_B04	1	0	0	0	0	0.0394413	0.041843	2.99326	0.154	0.463
7_3_B05	1	0	1	1	10	0.0410565	0.0441508	3.09907	0.163	0.461
7_3_B06	1	0	0	0	0	0.0408676	0.0420918	2.90973	0.151	0.448
7_3_B07	1	0	1	1	10	0.0350179	0.037381	2.83113	0.137	0.442
7_3_B08	1	0	0	0	0	0.0416191	0.0434282	2.82365	0.17	0.469
7_3_B09	1	0	0	0	0	0.0446744	0.0477305	3.12671	0.168	0.481
7_3_B10	1	0	1	1	10	0.0417493	0.0402229	2.89755	0.161	0.467
7_3_B11	1	0	1	1	10	0.0407007	0.0400829	2.97506	0.148	0.461
7_3_B12	1	0	1	1	10	0.042902	0.0447073	3.02292	0.15	0.469
7_3_C02	1	0	1	1	10	0.0288433	0.0260961	2.48946	0.151	0.354
7_3_C03	1	0	0	0	0	0.0420406	0.0419002	2.96763	0.174	0.479
7_3_C04	1	0	0	0	0	0.0373216	0.0384785	2.73754	0.143	0.435
7_3_C05	1	0	0	0	0	0.0406351	0.0393903	2.70533	0.164	0.466
7_3_C07	1	0	1	1	10	0.0318135	0.0294841	2.93654	0.154	0.411
7_3_C08	1	0	0	0	0	0.0412869	0.0447788	3.1683	0.155	0.476
7_3_C09	1	0	0	0	0	0.0439965	0.0480297	3.18746	0.162	0.483
7_3_C10	1	0	1	1	10	0.030742	0.0331174	2.86413	0.161	0.431
7_3_D01	1	0	0	0	0	0.0343988	0.0322141	3.00149	0.153	0.441
7_3_D03	1	0	1	1	10	0.0420002	0.0473404	3.03666	0.151	0.481
7_3_D04	1	0	0	0	0	0.0401329	0.0426969	3.06739	0.159	0.476
7_3_D06	1	0	0	0	0	0.0444371	0.0463104	3.20552	0.177	0.501
7_3_D07	1	0	0	0	0	0.0438819	0.0447315	2.93254	0.154	0.475
7_3_D08	1	0	1	1	10	0.0439684	0.0415395	3.02203	0.162	0.479
7_3_D10	1	0	1	1	10	0.0447381	0.0465722	3.18025	0.173	0.495
7_3_D11	1	0	0	0	0	0.0447903	0.0454357	3.14634	0.177	0.498
7_3_E01	1	0	0	0	0	0.0309551	0.0351146	3.01154	0.157	0.407
7_3_E03	1	0	0	0	0	0.041175	0.044709	3.00082	0.153	0.472
7_3_E04	1	0	1	1	10	0.0424713	0.0425996	3.05901	0.181	0.493
7_3_E05	1	0	0	0	0	0.0434946	0.043872	3.06429	0.185	0.487
7_3_E06	1	0	0	0	0	0.0331494	0.0347669	3.03207	0.169	0.449
7_3_E07	1	0	0	0	0	0.0429149	0.0400293	3.03196	0.156	0.471
7_3_E08	1	0	1	1	10	0.0393474	0.0448803	3.07521	0.16	0.482
7_3_E09	1	0	1	1	10	0.0408369	0.0431238	3.03362	0.162	0.461
7_3_E10	1	0	1	1	10	0.0452718	0.0439486	3.12944	0.179	0.483
7_3_E11	1	0	0	0	0	0.0498456	0.0471199	3.09377	0.188	0.481
7_3_E12	1	0	0	0	0	0.0429617	0.0457822	3.10102	0.17	0.507
7_3_F02	1	0	1	1	10	0.0410126	0.0451123	3.01369	0.155	0.463
7_3_F03	1	0	1	1	10	0.0452401	0.0450573	3.06322	0.181	0.493
7_3_F04	1	0	1	1	10	0.0375604	0.0393441	2.9646	0.159	0.457
7_3_F05	1	0	1	1	10	0.0444033	0.0478217	3.10964	0.163	0.5
7_3_F06	1	0	1	1	10	0.0404643	0.0395273	2.97581	0.152	0.456
7_3_F07	1	0	1	1	10	0.03899	0.0411715	3.03618	0.161	0.478
7_3_F10	1	0	1	1	10	0.040269	0.043179	3.10049	0.153	0.476
7_3_F11	1	0	1	1	10	0.0431468	0.0460836	3.10493	0.177	0.497
7_3_F12	1	0	0	0	0	0.0482565	0.0457972	3.15783	0.168	0.483
7_3_G01	1	0	1	1	10	0.0426442	0.0438616	2.90658	0.163	0.474
7_3_G02	1	0	0	0	0	0.0482661	0.046793	3.17847	0.174	0.506
7_3_G03	1	0	1	1	10	0.0454676	0.0414023	2.85511	0.172	0.447
7_3_G04	1	0	0	0	0	0.0453808	0.0436723	2.91838	0.166	0.482
7_3_G05	1	0	1	1	10	0.0437797	0.0427999	3.09238	0.162	0.471
7_3_G06	1	0	1	1	10	0.043755	0.0421481	3.02632	0.171	0.471
7_3_G07	1	0	1	1	10	0.0315597	0.0308575	2.98128	0.16	0.434
7_3_G08	1	0	0	0	0	0.0331084	0.034485	3.08069	0.162	0.454
7_3_G09	1	0	1	1	10	0.0424463	0.0445908	3.03363	0.164	0.471
7_3_G10	1	0	1	1	10	0.0435632	0.0420546	3.0041	0.172	0.48
7_3_G11	1	0	1	1	10	0.0453445	0.0436019	2.91022	0.164	0.48
7_3_G12	1	0	0	0	0	0.0451967	0.0461491	3.09725	0.175	0.49
7_3_H01	1	0	1	1	10	0.0391878	0.0371462	2.82211	0.156	0.452
7_3_H02	1	0	0	0	0	0.0374084	0.0351785	2.75941	0.139	0.435
7_3_H03	1	0	1	1	10	0.0333153	0.0301731	2.92833	0.161	0.407
7_3_H04	1	0	1	1	10	0.0439075	0.0445543	3.06577	0.172	0.478
7_3_H05	1	0	1	1	10	0.0448941	0.0442773	3.10162	0.175	0.483
7_3_H06	1	0	0	0	0	0.0449773	0.0424143	3.06251	0.179	0.471
7_3_H07	1	0	0	0	0	0.044127	0.0477094	3.14998	0.171	0.502
7_3_H08	1	0	1	1	10	0.0426211	0.0408218	3.04777	0.17	0.465
7_3_H09	1	0	0	0	0	0.033772	0.0338099	2.95045	0.159	0.433
7_3_H10	1	0	0	0	0	0.0458426	0.0485175	3.16063	0.171	0.503
7_3_H11	1	0	0	0	0	0.0459277	0.0447294	3.10817	0.162	0.489
7_3_H12	1	0	1	1	10	0.0398294	0.0389887	2.98648	0.155	0.469
7_4_A01	1	0	1	1	10	0.038224	0.0429896	2.83034	0.168	0.48
7_4_A02	1	0	1	1	10	0.0428234	0.0442922	3.14931	0.168	0.483
7_4_A03	1	0	0	0	0	0.0398636	0.0408275	3.01376	0.145	0.447
7_4_A06	1	0	0	0	0	0.0420365	0.0419359	3.09806	0.143	0.447
7_4_A07	1	0	0	0	0	0.0419174	0.0393081	3.01868	0.146	0.459
7_4_A09	1	0	0	0	0	0.0402533	0.039871	2.97535	0.144	0.445
7_4_A11	1	0	0	0	0	0.0462799	0.0487952	3.15447	0.171	0.497
7_4_A12	1	0	1	1	10	0.0414412	0.0407188	2.93535	0.157	0.462
7_4_B01	1	0	1	1	10	0.0424425	0.0453807	3.1194	0.161	0.491
7_4_B02	1	0	1	1	10	0.0431479	0.0442874	2.81014	0.166	0.476
7_4_B03	1	0	1	1	10	0.0430365	0.0471822	3.12908	0.163	0.487
7_4_B04	1	0	1	1	10	0.0392464	0.036647	2.81505	0.144	0.452
7_4_B06	1	0	1	1	10	0.0405496	0.0408275	2.83106	0.158	0.481
7_4_B08	1	0	0	0	0	0.0404286	0.0351812	2.7277	0.149	0.438
7_4_B09	1	0	1	1	10	0.0407062	0.041729	2.97443	0.154	0.455
7_4_B10	1	0	1	1	10	0.0431058	0.0446159	3.04569	0.146	0.443
7_4_B11	1	0	1	1	10	0.0444799	0.040102	3.00872	0.161	0.46
7_4_B12	1	0	1	1	10	0.0404834	0.0428468	3.10556	0.174	0.489
7_4_C01	1	0	1	1	10	0.0437643	0.0382351	3.13325	0.146	0.438
7_4_C04	1	0	0	0	0	0.0419487	0.0429629	3.00238	0.16	0.481
7_4_C05	1	0	1	1	10	0.0427149	0.0449311	3.12028	0.16	0.492
7_4_C06	1	0	1	1	10	0.0421267	0.0433035	3.01157	0.155	0.458
7_4_C07	1	0	1	1	10	0.0490156	0.0456991	3.08924	0.164	0.503
7_4_C09	1	0	1	1	10	0.0411804	0.0426633	3.04777	0.158	0.473
7_4_C11	1	0	0	0	0	0.0460416	0.0466418	3.09726	0.166	0.482
7_4_C12	1	0	0	0	0	0.042093	0.043436	3.04967	0.249	0.495
7_4_D01	1	0	1	1	10	0.0445418	0.0495648	3.1105	0.169	0.483
7_4_D02	1	0	1	1	10	0.0448865	0.0451495	2.93859	0.148	0.487
7_4_D03	1	0	1	1	10	0.0413735	0.0438941	3.00549	0.155	0.48
7_4_D05	1	0	1	1	10	0.0408965	0.041954	2.96573	0.164	0.461
7_4_D06	1	0	0	0	0	0.0475507	0.0452024	3.09663	0.17	0.5
7_4_D07	1	0	0	0	0	0.0451433	0.0431539	3.187	0.166	0.496
7_4_D08	1	0	1	1	10	0.0455207	0.046068	3.06364	0.159	0.474
7_4_D10	1	0	1	1	10	0.0462431	0.0440347	2.88978	0.166	0.487
7_4_D11	1	0	1	1	10	0.0404971	0.0402236	3.08168	0.168	0.483
7_4_D12	1	0	0	0	0	0.0409935	0.0378768	2.82453	0.162	0.44
7_4_E01	1	0	1	1	10	0.042534	0.0407804	3.02228	0.153	0.436
7_4_E02	1	0	1	1	10	0.0301014	0.0300041	2.9119	0.163	0.49
7_4_E03	1	0	1	1	10	0.0501695	0.0516103	3.16215	0.151	0.46
7_4_E04	1	0	0	0	0	0.0311484	0.0319187	3.00245	0.162	0.412
7_4_E06	1	0	0	0	0	0.0391695	0.0425214	2.96581	0.148	0.452
7_4_E07	1	0	1	1	10	0.0415661	0.0431588	2.91482	0.17	0.466
7_4_E08	1	0	1	1	10	0.0439105	0.0455089	3.07667	0.17	0.509
7_4_E09	1	0	1	1	10	0.0432004	0.0401246	2.86247	0.159	0.493
7_4_E10	1	0	1	1	10	0.0366862	0.0383077	2.78723	0.162	0.468
7_4_E12	1	0	0	0	0	0.0463596	0.0445111	2.88421	0.159	0.457
7_4_F01	1	0	1	1	10	0.0477274	0.0468565	3.06894	0.17	0.48
7_4_F02	1	0	0	0	0	0.0501353	0.0488546	2.9939	0.168	0.498
7_4_F03	1	0	1	1	10	0.0446694	0.0472397	3.11864	0.164	0.492
7_4_F04	1	0	1	1	10	0.0450279	0.0436518	3.0073	0.162	0.501
7_4_F05	1	0	1	1	10	0.0375925	0.040067	2.84993	0.162	0.477
7_4_F07	1	0	1	1	10	0.0422427	0.0445168	3.01674	0.144	0.432
7_4_F08	1	0	0	0	0	0.0479585	0.0473058	3.0634	0.164	0.483
7_4_F09	1	0	1	1	10	0.0446365	0.0424825	2.86558	0.174	0.498
7_4_F10	1	0	0	0	0	0.0417445	0.0401714	2.95207	0.159	0.469
7_4_F11	1	0	1	1	10	0.0412445	0.0407904	3.07191	0.177	0.469
7_4_F12	1	0	1	1	10	0.043894	0.0465092	3.15047	0.141	0.481
7_4_G01	1	0	0	0	0	0.0439059	0.0482948	2.99548	0.16	0.463
7_4_G02	1	0	1	1	10	0.0450509	0.0445796	2.99324	0.166	0.487
7_4_G03	1	0	1	1	10	0.0514269	0.0506894	3.25877	0.164	0.466
7_4_G04	1	0	0	0	0	0.0421161	0.0428826	3.0916	0.165	0.479
7_4_G05	1	0	1	1	10	0.0402079	0.040747	2.95627	0.171	0.48
7_4_G08	1	0	0	0	0	0.0445199	0.0514397	3.25094	0.164	0.503
7_4_G11	1	0	1	1	10	0.0384384	0.0383599	2.99777	0.151	0.462
7_4_G12	1	0	0	0	0	0.0396283	0.039431	2.91717	0.155	0.448
7_4_H01	1	0	0	0	0	0.0491626	0.0498649	3.15433	0.155	0.455
7_4_H02	1	0	1	1	10	0.0324884	0.0336313	2.84643	0.161	0.502
7_4_H03	1	0	0	0	0	0.0433661	0.0459972	3.19705	0.167	0.479
7_4_H04	1	0	1	1	10	0.0409361	0.0389549	3.02161	0.144	0.449
7_4_H05	1	0	0	0	0	0.0405037	0.0442437	3.15103	0.15	0.483
7_4_H06	1	0	0	0	0	0.0411796	0.0388608	3.04593	0.152	0.47
7_4_H07	1	0	1	1	10	0.0441109	0.045227	3.09436	0.148	0.471
7_4_H08	1	0	1	1	10	0.044601	0.0433882	3.03892	0.16	0.478
7_4_H10	1	0	0	0	0	0.0428028	0.044852	3.0929	0.15	0.482
7_4_H11	1	0	1	1	10	0.0421921	0.0409033	2.80804	0.155	0.458
7_4_H12	1	0	0	0	0	0.0468098	0.0470759	3.13395	0.157	0.46

## Sheet: S3
Table S3. Mean and variance for measurements using a single vs. final combined treatment platform
Measured feature	Mean	Variance	Mean	Variance
Morphometric (5 dpf)	Single treatment (n= 78)		Final multiple treatment (n= 72)
EA (mm^2)	0.0620219	1.28444e-05	0.0542862	3.00517e-05
L (mm)	3.60015	0.00455354	3.46945	0.0159584
OT (mm)	0.499473	0.000176445	0.480236	0.00020207
Tel (mm)	0.164932	5.05647e-05	0.148653	0.000382061
Behavior with 0 mM PTZ (5 dpf)	Single treatment (n= 12)		Final multiple treatment (n= 72)
Average movement 1 h (mm/min)	27.9535	635.98	30.9542	847.045
Average movement 15 min (mm/min)	33.0374	1227.01	13.7683	449.448

## Sheet: S4
Table S4. Summary of stable syngap1b mutant larvae morphometric and behavioral data
Fish features		Treatments				VAST morphometric measurements					DanioVision behavioral measurements
FishID	Genotype	VAST 3dpf	VAST 5dpf	Behavior	PTZ concentration (mM)	Area of first eye (mm^2)	Area of second eye (mm^2)	Length (mm)	Tel (mm)	OT (mm)	Average movement in 1h (mm/min)	Average movement last 15 min (mm/min)
1_1_B01	het	1	0	0	0	0.0445913	0.0453564	3.10668	0.137	0.468
1_1_C07	het	1	0	0	0	0.0445972	0.0477242	3.21556	0.155	0.506
1_1_C08	het	1	0	0	0	0.0460058	0.0474845	3.19365	0.158	0.49
1_1_D09	het	1	0	0	0	0.0478829	0.0462176	3.23771	0.15	0.495
1_1_E03	het	1	0	0	0	0.0472529	0.0477441	3.27155	0.164	0.492
1_1_E05	het	1	0	0	0	0.0452918	0.0472453	3.26732	0.165	0.487
1_1_E08	het	1	0	0	0	0.0451363	0.0475187	3.23141	0.16	0.513
1_1_F04	het	1	0	0	0	0.0450175	0.0482379	3.2249	0.142	0.483
1_1_F07	het	1	0	0	0	0.044659	0.0442942	3.09679	0.142	0.491
1_1_H01	het	1	0	0	0	0.0477924	0.0453135	3.20146	0.155	0.49
1_1_H11	het	1	0	0	0	0.0452037	0.045816	3.13347	0.151	0.502
1_1_B09	hom	1	0	0	0	0.0465542	0.047838	3.18269	0.177	0.507
1_1_D02	hom	1	0	0	0	0.0447374	0.0442491	3.21596	0.16	0.5
1_1_D11	hom	1	0	0	0	0.0467728	0.0474957	3.26171	0.169	0.505
1_1_E02	hom	1	0	0	0	0.0439367	0.0419574	3.16772	0.159	0.465
1_1_E06	hom	1	0	0	0	0.0464817	0.0472937	3.2854	0.167	0.505
1_1_F02	hom	1	0	0	0	0.0448991	0.0430199	3.15146	0.161	0.489
1_1_A03	WT	1	0	0	0	0.0445995	0.0423995	3.16375	0.165	0.488
1_1_A04	WT	1	0	0	0	0.0417688	0.0446307	3.17395	0.155	0.473
1_1_A05	WT	1	0	0	0	0.0277836	0.0305901	2.76516	0.116	0.369
1_1_A06	WT	1	0	0	0	0.0436348	0.0444926	3.17873	0.158	0.493
1_1_A08	WT	1	0	0	0	0.042869	0.0451601	3.20842	0.165	0.485
1_1_A09	WT	1	0	0	0	0.0404725	0.0441314	3.2148	0.144	0.475
1_1_C11	WT	1	0	0	0	0.0440563	0.046482	3.19943	0.165	0.511
1_1_D05	WT	1	0	0	0	0.0456871	0.0468353	3.14479	0.156	0.495
1_1_F08	WT	1	0	0	0	0.0419925	0.0417308	3.13331	0.142	0.471
1_1_G04	WT	1	0	0	0	0.0503804	0.0512992	3.24497	0.147	0.506
1_1_H02	WT	1	0	0	0	0.0489958	0.0499566	3.37067	0.158	0.507
1_1_H06	WT	1	0	0	0	0.0449557	0.0450929	3.25767	0.158	0.493
1_2_A05	het	1	0	0	0	0.0433417	0.0444143	3.27359	0.147	0.482
1_2_B09	het	1	0	0	0	0.0421607	0.0418226	3.10351	0.144	0.471
1_2_C07	het	1	0	0	0	0.049414	0.0482764	3.30599	0.155	0.495
1_2_D02	het	1	0	0	0	0.0467974	0.0526498	3.32036	0.153	0.508
1_2_D08	het	1	0	0	0	0.0493819	0.0485651	3.3627	0.156	0.5
1_2_D09	het	1	0	0	0	0.0440924	0.0473798	3.29889	0.166	0.511
1_2_E04	het	1	0	0	0	0.0435898	0.0467894	3.31544	0.149	0.489
1_2_E07	het	1	0	0	0	0.0454242	0.0507839	3.25517	0.164	0.504
1_2_B12	hom	1	0	0	0	0.0485838	0.0456061	3.25939	0.147	0.496
1_2_C03	hom	1	0	0	0	0.0498168	0.049053	3.2856	0.159	0.516
1_2_E02	hom	1	0	0	0	0.0454055	0.0501706	3.26871	0.164	0.5
1_2_E06	hom	1	0	0	0	0.0481371	0.0460797	3.1726	0.146	0.498
1_2_E10	hom	1	0	0	0	0.0505346	0.047325	3.30447	0.162	0.523
1_2_F04	hom	1	0	0	0	0.045257	0.0466862	3.18967	0.153	0.5
1_2_F05	hom	1	0	0	0	0.0463561	0.0478783	3.30986	0.166	0.508
1_2_D03	hom	1	0	0	0	0.0438953	0.0483076	3.28107	0.148	0.502
1_2_A12	WT	1	0	0	0	0.0454187	0.0452694	3.18816	0.156	0.478
1_2_D05	WT	1	0	0	0	0.0445696	0.0463888	3.23084	0.156	0.496
1_2_D10	WT	1	0	0	0	0.0455972	0.0452931	3.2101	0.153	0.499
1_2_E05	WT	1	0	0	0	0.0455438	0.0493369	3.40795	0.16	0.502
1_1_A07	het	0	1	1	10						185.722	178.828
1_1_B01	het	0	1	1	10	0.0499583	0.0536315	3.56667	0.115	0.469	240.915	218.533
1_1_B02	het	0	1	1	10	0.0613316	0.0593758	3.61333	0.133	0.486	169.659	132.637
1_1_C04	het	0	1	1	10	0.0545931	0.0492555	3.54978	0.115	0.452	106.852	137.19
1_1_C07	het	0	1	1	10	0.0504469	0.0559603	3.52767	0.12	0.48	232.638	240.174
1_1_C08	het	0	1	1	10						167.417	167.387
1_1_D09	het	0	1	1	10	0.0551679	0.0592757	3.57665	0.129	0.469	213.483	155.095
1_1_E03	het	0	1	1	10	0.0614276	0.0540603	3.63338	0.14	0.464	123.801	65.9809
1_1_E05	het	0	1	1	10	0.0603636	0.060694	3.62051	0.146	0.479	160.06	122.093
1_1_E08	het	0	1	1	10						178.761	126.173
1_1_E09	het	0	1	1	10						190.55	157.137
1_1_F04	het	0	1	1	10						195.512	141.378
1_1_F07	het	0	1	1	10						233.709	233.827
1_1_F11	het	0	1	1	10	0.0510333	0.0476499	3.58297	0.135	0.458	203.98	115.343
1_1_H01	het	0	1	1	10						89.1693	72.0492
1_1_H05	het	0	1	1	10	0.0564375	0.0529847	3.46043	0.132	0.444	120.314	92.7757
1_1_H11	het	0	1	1	10	0.0529378	0.0556883	3.48009	0.142	0.466	203.074	142.055
1_1_B03	hom	0	1	1	10						153.853	132.058
1_1_B07	hom	0	1	1	10	0.0556746	0.0569491	3.65871	0.126	0.469	183.615	149.894
1_1_B08	hom	0	1	1	10						111.699	84.3008
1_1_B09	hom	0	1	1	10						190.218	154.34
1_1_C03	hom	0	1	1	10						113.665	70.5352
1_1_D02	hom	0	1	1	10	0.0511435	0.0511056	3.55481	0.12	0.461	167.727	124.738
1_1_D11	hom	0	1	1	10	0.0511798	0.0517926	3.56074	0.144	0.462	205.613	174.257
1_1_E02	hom	0	1	1	10	0.0573356	0.0590819	3.60844	0.138	0.469	175.335	137.482
1_1_E06	hom	0	1	1	10	0.0544776	0.0533756	3.63754	0.121	0.48	157.454	87.8106
1_1_F02	hom	0	1	1	10	0.0493621	0.050406	3.4616	0.124	0.464	139.515	136.835
1_1_G07	hom	0	1	1	10						125.154	76.8779
1_1_H03	hom	0	1	1	10	0.0513238	0.0535894	3.57681	0.137	0.471	224.499	160.347
1_1_H08	hom	0	1	1	10						39.9894	34.2322
1_1_A03	WT	0	1	1	10	0.0531862	0.0512241	3.59557	0.116	0.47	106.433	59.7717
1_1_A04	WT	0	1	1	10						97.0305	56.9248
1_1_A05	WT	0	1	1	10						54.8421	59.1387
1_1_A06	WT	0	1	1	10	0.0555863	0.0583294	3.56097	0.138	0.47	168.511	140.459
1_1_A08	WT	0	1	1	10	0.057291	0.0585883	3.64159	0.119	0.491	150.16	145.911
1_1_A09	WT	0	1	1	10	0.0495001	0.0533658	3.69961	0.101	0.473	80.1393	66.1411
1_1_C02	WT	0	1	1	10	0.0421628	0.0506317	3.1489	0.135	0.418	113.859	110.959
1_1_C11	WT	0	1	1	10	0.0550766	0.054291	3.52344	0.133	0.463	183.103	150.118
1_1_D05	WT	0	1	1	10	0.0588897	0.0502007	3.49941	0.124	0.471	217.807	185.198
1_1_A05	WT	0	1	1	10	0.0446927	0.0442478	3.22173	0.127	0.446	54.8421	59.1387
1_1_D08	WT	0	1	1	10						212.173	210.376
1_1_E01	WT	0	1	1	10	0.0573805	0.0569924	3.55894	0.137	0.462	146.996	109.704
1_1_F08	WT	0	1	1	10	0.0549913	0.0546862	3.50091	0.122	0.447	103.53	97.6056
1_1_G04	WT	0	1	1	10	0.0542721	0.0560487	3.54613	0.131	0.489	227.259	206.997
1_1_G09	WT	0	1	1	10	0.0532989	0.0509264	3.50091	0.111	0.475	102.536	91.5731
1_1_G11	WT	0	1	1	10	0.0523355	0.055504	3.53441	0.126	0.46	116.373	83.3348
1_1_H02	WT	0	1	1	10						102.088	76.0767
1_1_H06	WT	0	1	1	10	0.0533107	0.0551671	3.62436	0.13	0.469	171.775	130.694
1_2_A05	het	0	1	1	0						6.52661	0.967601
1_2_B09	het	0	1	1	0						0.301305	1.18695
1_2_C07	het	0	1	1	0						2.73026	9.19815
1_2_C12	het	0	1	1	0	0.0525362	0.0520416	3.54752	0.162	0.477	0.192372	0.155371
1_2_D01	het	0	1	1	0	0.055248	0.0568174	3.62809	0.135	0.496	16.9598	8.06455
1_2_D02	het	0	1	1	0	0.0573138	0.0556275	3.76339	0.122	0.488	3.04571	1.245
1_2_D08	het	0	1	1	0	0.0447142	0.050499	3.67934	0.154	0.465	7.52564	16.9542
1_2_D09	het	0	1	1	0						4.74115	8.15118
1_2_D11	het	0	1	1	0	0.0535667	0.054948	3.68968	0.152	0.49	0.678617	1.61361
1_2_E03	het	0	1	1	0	0.0574023	0.0572013	3.803	0.123	0.496	2.3713	2.26694
1_2_E04	het	0	1	1	0	0.0532145	0.053096	3.73571	0.13	0.482	17.3659	21.2473
1_2_E07	het	0	1	1	0						83.6002	9.53329
1_2_B06	hom	0	1	1	0						3.3273	11.8422
1_2_B12	hom	0	1	1	0						4.61176	0.0823247
1_2_C03	hom	0	1	1	0						7.52315	14.0609
1_2_D03	hom	0	1	1	0						2.12801	0.233783
1_2_E02	hom	0	1	1	0	0.0545791	0.0552112	3.60041	0.146	0.487	2.21716	7.42192
1_2_E06	hom	0	1	1	0						0.970236	0.27368
1_2_E10	hom	0	1	1	0						43.3298	60.1583
1_2_F04	hom	0	1	1	0	0.0519077	0.0541089	3.61615	0.151	0.467	5.2894	5.17176
1_2_F05	hom	0	1	1	0	0.0517316	0.0538641	3.69159	0.14	0.479	50.3688	5.94938
1_2_A08	WT	0	1	1	0						8.64681	0.0932306
1_2_A10	WT	0	1	1	0	0.0519771	0.0533267	3.56444	0.128	0.45	21.2956	3.28138
1_2_A12	WT	0	1	1	0	0.0565526	0.0566528	3.70376	0.127	0.493	0.554581	0.448873
1_2_C10	WT	0	1	1	0						7.56574	24.6664
1_2_D05	WT	0	1	1	0						0.917575	0.256682
1_2_D06	WT	0	1	1	0						1.82646	3.77934
1_2_D10	WT	0	1	1	0	0.0523677	0.0516378	3.62402	0.148	0.486	3.94551	0.756
1_2_E05	WT	0	1	1	0	0.053825	0.0536608	3.81726	0.141	0.475	20.5734	38.61
1_2_E08	WT	0	1	1	0	0.0550373	0.0551932	3.73327	0.133	0.484	0.0967461	0
1_2_F06	WT	0	1	1	0	0.055063	0.0554557	3.63996	0.134	0.477	2.40857	0.701981
2_1_A07	het	1	0	0	0	0.0425159	0.0415017	3.14332	0.146	0.473
2_1_D03	het	1	0	0	0	0.0503853	0.0486161	3.31949	0.155	0.488
2_1_D04	het	1	0	0	0	0.047539	0.0461569	3.21189	0.158	0.503
2_1_D06	het	1	0	0	0	0.0476289	0.0446602	3.29441	0.165	0.497
2_1_D07	het	1	0	0	0	0.0446356	0.0447798	3.12906	0.157	0.484
2_1_E02	het	1	0	0	0	0.044422	0.0426677	3.17293	0.161	0.508
2_1_F01	het	1	0	0	0	0.0434093	0.0398626	2.87931	0.154	0.475
2_1_A09	het	1	0	0	0	0.0381832	0.0411607	2.93688	0.126	0.439
2_1_A10	het	1	0	0	0	0.0403036	0.0446163	3.18896	0.146	0.475
2_1_B07	het	1	0	0	0	0.0412353	0.0410244	3.03052	0.139	0.449
2_1_C06	het	1	0	0	0	0.0388537	0.0388313	3.12608	0.131	0.436
2_1_C12	het	1	0	0	0	0.0417557	0.0458049	3.24113	0.168	0.49
2_1_G11	het	1	0	0	0	0.0417751	0.0448841	3.17855	0.164	0.495
2_1_A06	hom	1	0	0	0	0.0450537	0.0453982	3.1657	0.145	0.482
2_1_C02	hom	1	0	0	0	0.0453685	0.0444765	3.11386	0.167	0.493
2_1_F03	hom	1	0	0	0	0.0429989	0.0416258	2.90536	0.161	0.471
2_1_F08	hom	1	0	0	0	0.046286	0.0469021	3.15012	0.149	0.488
2_1_H06	hom	1	0	0	0	0.0454898	0.0477588	3.28324	0.165	0.498
2_1_B09	hom	1	0	0	0	0.0453998	0.0492736	3.34047	0.168	0.487
2_1_C11	hom	1	0	0	0	0.0394536	0.040647	3.13462	0.136	0.469
2_1_D11	hom	1	0	0	0	0.0425321	0.0463315	3.3272	0.164	0.511
2_1_H09	hom	1	0	0	0	0.0417156	0.0447734	3.12384	0.15	0.481
2_1_C09	WT	1	0	0	0	0.0425336	0.0434966	3.13484	0.155	0.477
2_1_E10	WT	1	0	0	0	0.0383586	0.0397916	3.08014	0.164	0.476
2_1_E12	WT	1	0	0	0	0.0471859	0.0478645	3.36663	0.167	0.489
2_1_F06	WT	1	0	0	0	0.0433144	0.047855	3.15143	0.144	0.482
2_1_H08	WT	1	0	0	0	0.0420866	0.0411087	3.16864	0.128	0.456
2_1_B08	WT	1	0	0	0	0.0412666	0.0449574	3.11288	0.154	0.468
2_1_B10	WT	1	0	0	0	0.0428082	0.0403387	3.15373	0.141	0.468
2_1_C01	WT	1	0	0	0	0.0387205	0.0422894	3.11452	0.135	0.456
2_1_C05	WT	1	0	0	0	0.0411628	0.0394266	3.03955	0.139	0.458
2_1_E11	WT	1	0	0	0	0.0386394	0.0386423	3.05346	0.147	0.458
2_1_F11	WT	1	0	0	0	0.0486194	0.0525061	3.40459	0.173	0.52
2_1_G08	WT	1	0	0	0	0.0431289	0.0473376	3.16305	0.16	0.505
2_1_A07	het	0	1	1	0	0.0496278	0.0492013	3.64753	0.132	0.473	1.23916	0.929748
2_1_A09	het	0	1	1	0	0.0457171	0.0409399	3.32872	0.115	0.451	1.76959	3.8322
2_1_A10	het	0	1	1	0	0.0540481	0.0510319	3.56438	0.139	0.448	47.9883	3.18823
2_1_C06	het	0	1	1	0	0.0526639	0.0543228	3.65609	0.141	0.459	32.7196	126.969
2_1_D07	het	0	1	1	0	0.0492764	0.0477589	3.6133	0.125	0.473	0.152883	0.436838
2_1_E02	het	0	1	1	0						41.3415	0.0561624
2_1_E08	het	0	1	1	0						84.0867	24.8031
2_1_F01	het	0	1	1	0	0.0517441	0.0518527	3.32079	0.165	0.454	5.76701	17.0697
2_1_F10	het	0	1	1	0	0.058243	0.0535965	3.64195	0.13	0.478	64.2189	5.44068
2_1_A08	het	0	1	1	0						81.9857	27.8831
2_1_A11	het	0	1	1	0						60.1833	0.177099
2_1_B07	het	0	1	1	0	0.0518126	0.0480214	3.44331	0.147	0.45	3.17477	6.42865
2_1_C12	het	0	1	1	0						65.3237	0.752186
2_1_D03	het	0	1	1	0						119.022	31.6806
2_1_D04	het	0	1	1	0	0.0577316	0.0533766	3.6649	0.146	0.465	1.37211	0.0908049
2_1_D06	het	0	1	1	0						73.2996	24.9015
2_1_G11	het	0	1	1	0						2.34908	0.0415723
2_1_H03	het	0	1	1	0	0.0486174	0.0502144	3.52828	0.156	0.477	2.98488	7.35439
2_1_H10	het	0	1	1	0						4.58987	0
2_1_B09	hom	0	1	1	0						16.6784	1.90056
2_1_C02	hom	0	1	1	0	0.0538712	0.054396	3.57173	0.139	0.476	137.53	58.3319
2_1_C10	hom	0	1	1	0	0.0550038	0.0540171	3.71231	0.122	0.468	59.7824	34.3727
2_1_C11	hom	0	1	1	0	0.053069	0.0514075	3.60576	0.126	0.475	6.02578	14.5155
2_1_D11	hom	0	1	1	0	0.0566819	0.0569393	3.69381	0.148	0.475	35.0443	3.90028
2_1_H06	hom	0	1	1	0	0.0598893	0.0543097	3.6831	0.137	0.47	24.7599	0.219414
2_1_H12	hom	0	1	1	0	0.0531719	0.0505473	3.64089	0.149	0.475	3.79028	5.28517
2_1_A06	hom	0	1	1	0						4.11616	0.224078
2_1_F03	hom	0	1	1	0						3.41097	11.6645
2_1_F08	hom	0	1	1	0	0.0566702	0.0523091	3.63216	0.137	0.474	0.161544	0.145245
2_1_H09	hom	0	1	1	0						142.697	133.667
2_1_F02	WT	0	1	1	0	0.0549897	0.0569985	3.56721	0.145	0.468	30.9463	0
2_1_F11	WT	0	1	1	0	0.0562601	0.0532986	3.6679	0.143	0.494	11.408	0.737816
2_1_H08	WT	0	1	1	0	0.0491787	0.0469286	3.64622	0.154	0.468	1.376	0.772691
2_1_B08	WT	0	1	1	0	0.050077	0.0513499	3.53918	0.14	0.469	20.3378	23.1903
2_1_B10	WT	0	1	1	0						14.0112	8.38115
2_1_B12	WT	0	1	1	0						94.9059	81.3007
2_1_C01	WT	0	1	1	0						3.54237	91.9207
2_1_C05	WT	0	1	1	0						2.7332	8.12367
2_1_C09	WT	0	1	1	0	0.05381	0.0513701	3.62491	0.135	0.459	20.128	1.33897
2_1_E10	WT	0	1	1	0	0.0480054	0.0496375	3.46262	0.149	0.455	3.14868	0.0837885
2_1_E11	WT	0	1	1	0	0.0516033	0.0521687	3.54143	0.154	0.457	7.43765	22.7233
2_1_E12	WT	0	1	1	0						111.844	18.1139
2_1_F05	WT	0	1	1	0						15.2176	7.98624
2_1_F06	WT	0	1	1	0						1.2051	3.83854
2_1_G08	WT	0	1	1	0	0.0554221	0.0512939	3.60765	0.147	0.473	3.35212	1.75906
2_1_G10	WT	0	1	1	0	0.0504965	0.0478698	3.40721	0.126	0.478	15.2822	1.06482

## Sheet: S5
Table S5. Genotype effects on morphometric measurements in mutant zebrafish larvae
Gene	Age (dpf)	Measurement	ANOVA genotype effect		Tukey post-hoc (p-value)			Effect size hom vs WT/mock
			F (df)	p-value	hom-het	hom-WT	het-WT
syngap1b	3	OT	14.30 (2, 76)	5.36e-06	0.0082321	2.7e-06	0.032256	1.03099
syngap1b	3	EA	11.689 (2, 76)	3.75e-05	0.28833	4.16e-05	0.0026481	1.046
syngap1b	3	L	1.228 (2, 76)	0.299
syngap1b	3	Tel	4.933 (2, 76)	0.00971	0.02103	0.0167532	0.982865	1.04082
syngap1b	5	OT	0.536 (2, 35)	0.589974
syngap1b	5	EA	2.606 (2, 35)	0.08811	0.0767202	0.243399	0.797318
syngap1b	5	L	1.426 (2, 35)	0.253983
syngap1b	5	Tel	0.018 (2, 35)	0.982
slc7a5	3	OT	7.197 (2, 299)	0.000886	0.0018363	0.0227042	0.800718	0.998711
slc7a5	3	EA	14.63 (2, 299)	8.67e-07	4e-07	0.0074979	0.155754	0.990564
slc7a5	3	L	7.672 (2, 299)	0.000564	0.0005894	0.0098708	0.928747	0.993691
slc7a5	3	Tel	1.357 (2, 299)	0.2591	0.7379	0.232611	0.698041
slc7a5	5	OT	0.064 (2, 96)	0.9381
slc7a5	5	EA	2.571 (2, 96)	0.081693
slc7a5	5	L	1.928 (2, 96)	0.151
slc7a5	5	Tel	2.931 (2, 96)	0.0581	0.0581052	0.855165	0.258408
slc7a5 (pooled)	3	OT	1.819 (1, 167)	0.0498				1.01309
slc7a5 (pooled)	3	EA	0.001 (1, 167)	0.9759
slc7a5 (pooled)	3	L	0.721 (1, 167)	0.000247				0.976399
slc7a5 (pooled)	3	Tel	17.367 (1, 167)	0.0105				1.01592
slc7a5 (pooled)	5	OT	0.7 (1, 50)	0.407
slc7a5 (pooled)	5	EA	0.054 (1, 50)	0.81649
slc7a5 (pooled)	5	L	0.993 (1, 50)	0.32384
slc7a5 (pooled)	5	Tel	0.002 (1, 50)	0.9676

## Sheet: S6
Table S6. Genotype effects on behavioral measurements in mutant zebrafish larvae
Time	PTZ (mM)	comparison	mean rank diff	p value	mean distance	genotype
syngap1b stable
1 h	0	het vs hom	-0.07834	>0.999	25.9137	het
1 h	0	het vs WT	3.345	>0.999	26.2597	hom
1 h	0	hom vs WT	3.423	>0.999	16.1955	WT
1 h	10	het vs hom	7.206	0.4615	177.389	het
1 h	10	het vs WT	11.59	0.0474	150.564	hom
1 h	10	hom vs WT	4.382	>0.999	138.507	WT
15 min	0	het vs hom	-0.0381	>0.999	11.2755	het
15 min	0	het vs WT	3.173	>0.999	17.6724	hom
15 min	0	hom vs WT	3.21	>0.999	9.77828	WT
15 min	10	het vs hom	7.37	0.4334	147.38	het
15 min	10	het vs WT	8.29	-0.2524	115.786	hom
15 min	10	hom vs WT	0.9202	0.999	117.192	WT
slc7a5 stable
1 h	0	het vs hom	5.938	>0.999	11.9033	het
1 h	0	het vs WT	19.53	0.1003	8.30334	hom
1 h	0	hom vs WT	13.59	0.511	4.81374	WT
1 h	10	het vs WT	-3.591	>0.999	145.191	het
1 h	10	het vs WT	0.0358	>0.999	147.842	hom
1 h	10	hom vs WT	3.627	>0.999	142.949	WT
15 min	0	het vs hom	2.669	>0.999	23.6496	het
15 min	0	het vs WT	17.37	0.1754	18.5205	hom
15 min	0	hom vs WT	14.7	0.4137	7.90632	WT
15 min	10	het vs hom	-21.9	0.046	122.828	het
15 min	10	het vs WT	7.494	>0.999	141.304	hom
15 min	10	hom vs WT	29.4	0.013	116.717	WT
slc7a5 pooled
1 h	0	pool vs mock		0.81	13.3524	pool
1 h	0				11.269	mock
1 h	10	pool vs mock		0.175	138.406	pool
1 h	10				164.803	mock
15 min	0	pool vs mock		0.932	13.8608	pool
15 min	0				16.9465	mock
15 min	10	pool vs mock		0.993	130.369	pool
15 min	10				139.782	mock

## Sheet: S7
Table S7. Summary of stable slc7a5 mutant larvae morphometric and behavioral data
Fish features		Treatments				VAST morphometric measurements					DanioVision behavioral measurements
FishID 3dpf	Genotype	VAST 3dpf	VAST 5dpf	Behavior	PTZ concentration (mM)	Area of first eye (mm^2)	Area of second eye (mm^2)	Length (mm)	Tel (mm)	OT (mm)	Average movement in 1h (mm/min)	Average movement last 15 min (mm/min)
1_1_A01	het	1	0	0	0	0.217252	0.0459973	3.12904	0.132	0.494
1_1_A10	het	1	0	0	0	0.203376	0.0331898	2.92245	0.116	0.437
1_1_A11	het	1	0	0	0	0.199489	0.0430616	2.97182	0.136	0.459
1_1_B03	het	1	0	0	0	0.207192	0.0414108	3.05431	0.116	0.464
1_1_B05	het	1	0	0	0	0.212056	0.0449077	3.16266	0.138	0.462
1_1_B09	het	1	0	0	0	0.207284	0.0499527	3.09035	0.121	0.467
1_1_B10	het	1	0	0	0	0.200916	0.0414283	2.93592	0.116	0.449
1_1_B11	het	1	0	0	0	0.198171	0.0385534	2.91985	0.099	0.431
1_1_B12	het	1	0	0	0	0.212586	0.0433015	3.04068	0.134	0.461
1_1_C05	het	1	0	0	0	0.199932	0.0422285	3.00221	0.116	0.45
1_1_C07	het	1	0	0	0	0.194456	0.0359263	2.87506	0.123	0.429
1_1_C10	het	1	0	0	0	0.213486	0.0411127	2.93775	0.116	0.44
1_1_D03	het	1	0	0	0	0.204733	0.0448494	2.97891	0.134	0.462
1_1_D05	het	1	0	0	0	0.211952	0.0400301	3.02556	0.136	0.469
1_1_D06	het	1	0	0	0	0.208664	0.0467663	3.05228	0.134	0.453
1_1_D09	het	1	0	0	0	0.203261	0.0437502	3.01732	0.129	0.468
1_1_D12	het	1	0	0	0	0.197463	0.0439932	3.0309	0.121	0.471
1_1_E02	het	1	0	0	0	0.20685	0.0479417	3.14987	0.123	0.491
1_1_E03	het	1	0	0	0	0.207591	0.0405874	3.07259	0.134	0.472
1_1_E04	het	1	0	0	0	0.206209	0.0402434	3.00205	0.11	0.448
1_1_E05	het	1	0	0	0	0.208899	0.045972	3.06584	0.145	0.487
1_1_E07	het	1	0	0	0	0.201892	0.0416005	3.05008	0.106	0.441
1_1_E09	het	1	0	0	0	0.210672	0.045529	3.0876	0.112	0.479
1_1_E10	het	1	0	0	0	0.205821	0.0471348	3.04415	0.127	0.485
1_1_F08	het	1	0	0	0	0.217288	0.0496277	3.09845	0.14	0.475
1_1_F11	het	1	0	0	0	0.193709	0.0393698	2.96863	0.125	0.437
1_1_G02	het	1	0	0	0	0.20685	0.0449882	3.04582	0.129	0.477
1_1_G03	het	1	0	0	0	0.206049	0.0439053	3.00148	0.136	0.468
1_1_G06	het	1	0	0	0	0.204521	0.0447842	2.99458	0.116	0.451
1_1_G08	het	1	0	0	0	0.21283	0.0490007	3.0855	0.132	0.487
1_1_G09	het	1	0	0	0	0.206285	0.0442345	2.98933	0.13	0.46
1_1_G10	het	1	0	0	0	0.215729	0.0472711	3.09886	0.136	0.467
1_1_G12	het	1	0	0	0	0.209128	0.0495424	3.10287	0.128	0.492
1_1_H03	het	1	0	0	0	0.208728	0.0426128	3.05163	0.127	0.462
1_1_H05	het	1	0	0	0	0.216471	0.0509353	3.08589	0.143	0.489
1_1_H08	het	1	0	0	0	0.207575	0.0402376	2.91963	0.119	0.424
1_1_A03	hom	1	0	0	0	0.200196	0.0388761	2.88095	0.114	0.456
1_1_A05	hom	1	0	0	0	0.202601	0.0409056	3.01863	0.121	0.452
1_1_A07	hom	1	0	0	0	0.184449	0.0351008	2.91225	0.102	0.391
1_1_B02	hom	1	0	0	0	0.194775	0.0402243	2.90754	0.101	0.415
1_1_B04	hom	1	0	0	0	0.218016	0.0485635	3.15746	0.136	0.489
1_1_B06	hom	1	0	0	0	0.222878	0.0452007	3.12685	0.139	0.484
1_1_B07	hom	1	0	0	0	0.221518	0.0462223	3.08352	0.147	0.491
1_1_C01	hom	1	0	0	0	0.206526	0.0401938	2.97725	0.123	0.446
1_1_C09	hom	1	0	0	0	0.20762	0.050049	3.1178	0.13	0.477
1_1_C11	hom	1	0	0	0	0.206459	0.046188	2.9993	0.121	0.455
1_1_D07	hom	1	0	0	0	0.207147	0.0454112	3.04577	0.119	0.445
1_1_D11	hom	1	0	0	0	0.207795	0.0383631	2.9807	0.125	0.446
1_1_E11	hom	1	0	0	0	0.210597	0.0409802	3.03952	0.138	0.478
1_1_F06	hom	1	0	0	0	0.204428	0.0406573	2.94084	0.132	0.467
1_1_H01	hom	1	0	0	0	0.199181	0.0384954	2.89577	0.103	0.378
1_1_H11	hom	1	0	0	0	0.207304	0.0432023	3.05767	0.112	0.474
1_1_A04	WT	1	0	0	0	0.197326	0.043058	3.00885	0.106	0.448
1_1_A06	WT	1	0	0	0	0.2106	0.0467961	3.03908	0.127	0.481
1_1_A08	WT	1	0	0	0	0.197743	0.0442704	3.08119	0.106	0.449
1_1_A12	WT	1	0	0	0	0.205407	0.0439439	3.03563	0.127	0.454
1_1_B01	WT	1	0	0	0	0.217925	0.0445075	3.08442	0.139	0.484
1_1_B08	WT	1	0	0	0	0.209295	0.0471882	3.07724	0.114	0.473
1_1_C08	WT	1	0	0	0	0.215247	0.0478151	3.07948	0.121	0.486
1_1_D01	WT	1	0	0	0	0.224763	0.0508524	3.26315	0.14	0.502
1_1_D02	WT	1	0	0	0	0.213747	0.0438485	3.02442	0.141	0.479
1_1_D04	WT	1	0	0	0	0.222404	0.0452675	3.13041	0.13	0.487
1_1_E01	WT	1	0	0	0	0.201269	0.0438494	3.01311	0.119	0.464
1_1_E08	WT	1	0	0	0	0.202017	0.0402515	3.02935	0.143	0.464
1_1_E12	WT	1	0	0	0	0.210583	0.0463558	3.05265	0.121	0.47
1_1_F07	WT	1	0	0	0	0.211044	0.0466013	3.05957	0.108	0.464
1_1_G01	WT	1	0	0	0	0.192932	0.0346067	2.87001	0.123	0.415
1_1_H04	WT	1	0	0	0	0.22035	0.0456519	3.12577	0.123	0.499
1_1_H06	WT	1	0	0	0	0.211201	0.040428	3.02834	0.11	0.447
1_1_H10	WT	1	0	0	0	0.198173	0.0416587	2.97276	0.108	0.45
1_1_G04	WT	1	0	0	0	0.209107	0.0435679	3.08017	0.125	0.476
1_2_A02	het	1	0	0	0	0.206629	0.0423294	3.10962	0.119	0.467
1_2_A03	het	1	0	0	0	0.20894	0.0450306	3.05575	0.123	0.47
1_2_A04	het	1	0	0	0	0.218931	0.0488555	3.07832	0.127	0.506
1_2_A07	het	1	0	0	0	0.216416	0.0445242	3.14531	0.129	0.488
1_2_A08	het	1	0	0	0	0.19693	0.0376849	2.97979	0.116	0.442
1_2_B06	het	1	0	0	0	0.200329	0.0414604	2.92487	0.102	0.429
1_2_B08	het	1	0	0	0	0.19411	0.0393235	2.95813	0.127	0.456
1_2_B09	het	1	0	0	0	0.19426	0.0378509	2.86505	0.094	0.414
1_2_B11	het	1	0	0	0	0.210176	0.0447955	3.00006	0.131	0.448
1_2_C03	het	1	0	0	0	0.198045	0.0407476	2.90418	0.117	0.437
1_2_C05	het	1	0	0	0	0.220505	0.0466857	3.07946	0.134	0.492
1_2_C06	het	1	0	0	0	0.191519	0.0377807	2.88543	0.103	0.416
1_2_C09	het	1	0	0	0	0.186491	0.0345578	2.6917	0.101	0.385
1_2_C10	het	1	0	0	0	0.19061	0.0411467	2.92637	0.116	0.452
1_2_C11	het	1	0	0	0	0.202863	0.0475969	2.95424	0.12	0.458
1_2_C12	het	1	0	0	0	0.211275	0.0431241	3.0234	0.123	0.483
1_2_D08	het	1	0	0	0	0.196965	0.0384783	2.91101	0.123	0.44
1_2_D09	het	1	0	0	0	0.196213	0.038034	2.92591	0.11	0.43
1_2_E02	het	1	0	0	0	0.182493	0.0355667	2.86621	0.101	0.385
1_2_E09	het	1	0	0	0	0.186482	0.0356282	2.80833	0.118	0.339
1_2_A01	hom	1	0	0	0	0.201105	0.0435192	2.99198	0.106	0.448
1_2_A06	hom	1	0	0	0	0.182557	0.0322677	2.91102	0.103	0.404
1_2_A09	hom	1	0	0	0	0.203653	0.0436099	3.08735	0.135	0.458
1_2_A10	hom	1	0	0	0	0.202392	0.0421229	3.10641	0.126	0.483
1_2_B05	hom	1	0	0	0	0.206272	0.0423685	2.99731	0.11	0.464
1_2_C07	hom	1	0	0	0	0.181999	0.0340938	2.81416	0.114	0.387
1_2_D02	hom	1	0	0	0	0.213082	0.0463843	3.15551	0.116	0.489
1_2_D03	hom	1	0	0	0	0.215395	0.0408104	2.99338	0.139	0.482
1_2_D07	hom	1	0	0	0	0.203509	0.0418907	3.00808	0.116	0.464
1_2_D12	hom	1	0	0	0	0.186343	0.0386674	2.84982	0.116	0.439
1_2_A05	WT	1	0	0	0	0.203168	0.0411987	3.05313	0.112	0.463
1_2_A11	WT	1	0	0	0	0.20907	0.0486593	3.08805	0.116	0.48
1_2_B02	WT	1	0	0	0	0.207295	0.0485198	3.01919	0.13	0.484
1_2_B04	WT	1	0	0	0	0.198376	0.0405633	3.04088	0.1	0.458
1_2_B10	WT	1	0	0	0	0.204118	0.0462841	3.07525	0.123	0.487
1_2_B12	WT	1	0	0	0	0.214829	0.0453779	3.1353	0.114	0.472
1_2_C04	WT	1	0	0	0	0.213767	0.0447009	3.06329	0.136	0.487
1_2_C08	WT	1	0	0	0	0.191798	0.0335873	2.79656	0.11	0.397
1_2_D01	WT	1	0	0	0	0.183843	0.0374481	2.72803	0.105	0.389
1_2_D11	WT	1	0	0	0	0.184291	0.033368	2.80789	0.099	0.338
1_2_E07	WT	1	0	0	0	0.187628	0.0366073	2.71175	0.131	0.364
1_1_A01	het	0	1	1	10	0.230036	0.0570457	3.5747	0.088	0.499	181.364	152.921
1_1_A10	het	0	1	1	10						116.474	124.155
1_1_A11	het	0	1	1	10						144.685	137.816
1_1_B03	het	0	1	1	10						177.545	151.443
1_1_B05	het	0	1	1	10						133.196	77.4337
1_1_B09	het	0	1	1	10	0.233616	0.0540113	3.26861	0.108	0.483	198.213	218.369
1_1_B10	het	0	1	1	10	0.225485	0.0493859	3.38126	0.061	0.52	131.73	142.14
1_1_B11	het	0	1	1	10	0.228993	0.0555626	3.44068	0.101	0.475	113.676	130.141
1_1_B12	het	0	1	1	10	0.229274	0.0520087	3.47033	0.088	0.494	107.775	69.4725
1_1_C05	het	0	1	1	10						123.063	82.2848
1_1_C10	het	0	1	1	10	0.248202	0.0622971	3.38081	0.128	0.478	156.762	129.791
1_1_C12	het	0	1	1	10						146.021	120.323
1_1_D03	het	0	1	1	10	0.232221	0.0562685	3.452	0.074	0.495	144.943	129.631
1_1_D05	het	0	1	1	10	0.233322	0.056597	3.47574	0.108	0.481	130.833	148.471
1_1_D06	het	0	1	1	10						157.03	162.622
1_1_D08	het	0	1	1	10	0.237075	0.0570048	3.59077	0.095	0.501	166.42	170.936
1_1_D09	het	0	1	1	10						177.942	180.716
1_1_D12	het	0	1	1	10						147.998	157.159
1_1_E02	het	0	1	1	10						197.979	179.283
1_1_E03	het	0	1	1	10						121.598	41.8725
1_1_E04	het	0	1	1	10						146.248	79.5589
1_1_E05	het	0	1	1	10						126.215	68.7421
1_1_E07	het	0	1	1	10						174.49	176.95
1_1_E09	het	0	1	1	10						113.22	78.0991
1_1_E10	het	0	1	1	10	0.231642	0.0563813	3.5327	0.084	0.509	228.462	221.833
1_1_F08	het	0	1	1	10						151.23	139.508
1_1_F11	het	0	1	1	10						136.63	135.972
1_1_G02	het	0	1	1	10						135.559	146.803
1_1_G03	het	0	1	1	10	0.237029	0.0521664	3.42056	0.099	0.491	110.908	60.9914
1_1_G06	het	0	1	1	10						152.299	172.802
1_1_G08	het	0	1	1	10	0.244425	0.0678672	3.53928	0.108	0.512	160.144	163.332
1_1_G09	het	0	1	1	10						125.281	143.841
1_1_G10	het	0	1	1	10	0.235214	0.0544091	3.55963	0.103	0.504	137.638	170.431
1_1_G12	het	0	1	1	10						160.809	136.517
1_1_H03	het	0	1	1	10	0.221965	0.0551846	3.56213	0.077	0.501	123.989	98.6991
1_1_H05	het	0	1	1	10	0.247047	0.0616498	3.51493	0.103	0.503	150.954	118.384
1_1_H08	het	0	1	1	10	0.243219	0.0518484	3.44389	0.121	0.468	102.268	81.7098
1_1_A03	hom	0	1	1	10	0.224056	0.050805	3.37889	0.101	0.47	109.061	79.0223
1_1_A05	hom	0	1	1	10	0.230966	0.0554226	3.50864	0.057	0.495	132.67	144.249
1_1_A07	hom	0	1	1	10						112.262	104.278
1_1_B02	hom	0	1	1	10	0.231851	0.0526187	3.47528	0.068	0.49	126.237	140.835
1_1_B04	hom	0	1	1	10	0.244363	0.0576368	3.63112	0.127	0.499	137.483	82.6959
1_1_B06	hom	0	1	1	10						141.011	140.247
1_1_B07	hom	0	1	1	10						166.008	114.083
1_1_C01	hom	0	1	1	10						135.898	131.848
1_1_C03	hom	0	1	1	10	0.228838	0.0505689	3.39804	0.116	0.47	154.742	118.577
1_1_C09	hom	0	1	1	10						137.008	120.255
1_1_C11	hom	0	1	1	10						99.075	143.23
1_1_D07	hom	0	1	1	10						115.346	96.0424
1_1_D11	hom	0	1	1	10	0.228764	0.0519298	3.41709	0.119	0.466	109.397	121.586
1_1_E11	hom	0	1	1	10	0.230782	0.0557283	3.52042	0.103	0.499	137.789	93.7367
1_1_F06	hom	0	1	1	10	0.229466	0.0529945	3.32824	0.11	0.477	126.162	153.712
1_1_G11	hom	0	1	1	10						128.483	154.329
1_1_H01	hom	0	1	1	10	0.225815	0.0566457	3.37494	0.105	0.468	110.31	131.444
1_1_H11	hom	0	1	1	10	0.232812	0.0537807	3.4471	0.101	0.488	143.791	163.429
1_1_A04	WT	0	1	1	10	0.22852	0.0534591	3.52086	0.059	0.498	127.992	105.09
1_1_A06	WT	0	1	1	10	0.223433	0.0509277	3.3991	0.052	0.493	152.707	117.408
1_1_A08	WT	0	1	1	10						130.968	70.7992
1_1_A12	WT	0	1	1	10	0.235069	0.0566891	3.49032	0.101	0.473	107.331	108.517
1_1_B01	WT	0	1	1	10	0.230125	0.0577054	3.57245	0.081	0.486	155.773	111.251
1_1_B08	WT	0	1	1	10						136.762	166.772
1_1_C04	WT	0	1	1	10	0.234046	0.0577484	3.25198	0.042	0.518	151.623	122.032
1_1_C08	WT	0	1	1	10						160.634	104.938
1_1_D01	WT	0	1	1	10						180.065	179.748
1_1_D02	WT	0	1	1	10						142.896	118.338
1_1_D04	WT	0	1	1	10	0.227553	0.0533004	3.57835	0.09	0.511	150.437	124.862
1_1_E01	WT	0	1	1	10	0.231666	0.0538928	3.47025	0.101	0.483	169.765	149.96
1_1_E08	WT	0	1	1	10	0.248049	0.0582108	3.51114	0.128	0.473	120.2	143.826
1_1_E12	WT	0	1	1	10						111.168	59.6907
1_1_F07	WT	0	1	1	10	0.239757	0.0549381	3.50317	0.083	0.492	149.409	73.9276
1_1_F10	WT	0	1	1	10						132.896	136.767
1_1_G01	WT	0	1	1	10	0.227513	0.0517128	3.34934	0.119	0.483	111.217	116.416
1_1_H04	WT	0	1	1	10	0.232483	0.0620416	3.41597	0.105	0.497	148.14	148.018
1_1_H06	WT	0	1	1	10	0.229121	0.0511811	3.40808	0.09	0.512	123.367	134.043
1_1_H10	WT	0	1	1	10	0.24291	0.0606266	3.49232	0.119	0.472	173.736	91.4388
1_1_G04	WT	0	1	1	10	0.226604	0.0574832	3.50883	0.084	0.507	131.398	133.47
1_2_A02	het	0	1	1	10						189.932	143.995
1_2_A03	het	0	1	1	10						146.371	102.988
1_2_A04	het	0	1	1	10						179.044	161.948
1_2_A07	het	0	1	1	10	0.240245	0.0558132	3.54839	0.088	0.502	146.016	116.949
1_2_A08	het	0	1	1	10						125.071	129.455
1_2_B06	het	0	1	1	10						81.1658	45.389
1_2_B08	het	0	1	1	10						135.449	128.389
1_2_B09	het	0	1	1	10	0.239777	0.0525134	3.35857	0.11	0.461	99.8341	124.561
1_2_B11	het	0	1	1	10	0.232543	0.0567775	3.46003	0.066	0.497	121.499	128.097
1_2_C03	het	0	1	1	10	0.223081	0.0515821	3.33046	0.077	0.492	141.611	129.36
1_2_C05	het	0	1	1	10						118.845	102.553
1_2_C06	het	0	1	1	10	0.232095	0.0575452	3.08016	0.121	0.486	75.8111	62.849
1_2_C09	het	0	1	1	10						118.123	124.154
1_2_C10	het	0	1	1	10	0.232647	0.0511069	3.38029	0.125	0.455	121.153	67.6855
1_2_C11	het	0	1	1	10	0.227107	0.054065	3.4167	0.094	0.486	129.295	97.9418
1_2_C12	het	0	1	1	10						136.752	78.8838
1_2_D08	het	0	1	1	10						77.7139	97.6301
1_2_D09	het	0	1	1	10	0.231356	0.0499703	3.53122	0.119	0.474	90.8887	87.4543
1_2_E01	het	0	1	1	10	0.239904	0.0612313	3.69445	0.097	0.495	147.136	99.2918
1_2_E02	het	0	1	1	10	0.222528	0.0562175	3.35735	0.088	0.472	89.2731	69.0159
1_2_E09	het	0	1	1	10	0.22476	0.0511499	3.49796	0.112	0.477	68.9165	47.447
1_2_A01	hom	0	1	1	10	0.232662	0.0570338	3.54218	0.09	0.492	168.735	171.628
1_2_A06	hom	0	1	1	10	0.224725	0.0497638	3.43472	0.061	0.501	136.447	158.249
1_2_A09	hom	0	1	1	10	0.23305	0.0578435	3.60499	0.101	0.506	134.73	146.107
1_2_A10	hom	0	1	1	10						200.467	205.707
1_2_B05	hom	0	1	1	10	0.236744	0.0545707	3.44715	0.094	0.494	153.707	174.051
1_2_C07	hom	0	1	1	10	0.21222	0.0502492	3.2701	0.123	0.461	163.33	132.081
1_2_D02	hom	0	1	1	10						170.781	131.549
1_2_D03	hom	0	1	1	10						142.218	158.713
1_2_D07	hom	0	1	1	10	0.232507	0.0548845	3.42556	0.075	0.508	136.931	163.484
1_2_D12	hom	0	1	1	10	0.235005	0.0526762	3.32649	0.103	0.468	96.4109	99.5026
1_2_A05	WT	0	1	1	10						111.18	85.1808
1_2_A11	WT	0	1	1	10						175.872	158.026
1_2_B02	WT	0	1	1	10	0.241036	0.0599502	3.51625	0.112	0.487	159.673	109.355
1_2_B04	WT	0	1	1	10	0.230297	0.0568469	3.51752	0.057	0.494	137.038	73.1609
1_2_B12	WT	0	1	1	10						128.834	93.8491
1_2_C04	WT	0	1	1	10	0.240807	0.0520553	3.55787	0.108	0.481	141.753	105.051
1_2_C08	WT	0	1	1	10	0.224278	0.0547519	3.33151	0.114	0.47	94.7834	63.4036
1_2_D01	WT	0	1	1	10	0.22105	0.047056	3.26124	0.114	0.467	114.163	115.321
1_2_D06	WT	0	1	1	10	0.235649	0.0548953	3.52389	0.099	0.499	134.665	114.912
1_2_D11	WT	0	1	1	10	0.236775	0.0554342	3.31726	0.116	0.459	90.3522	76.8177
1_2_E07	WT	0	1	1	10						88.4559	46.3429
2_1_A04	het	1	0	0	0	0.234976	0.048016	3.2057	0.103	0.475
2_1_A09	het	1	0	0	0	0.213668	0.0448202	3.13536	0.119	0.47
2_1_A10	het	1	0	0	0	0.20812	0.0442965	3.04628	0.119	0.474
2_1_B11	het	1	0	0	0	0.210011	0.0503003	3.19559	0.112	0.503
2_1_C03	het	1	0	0	0	0.211846	0.0477087	3.06006	0.119	0.476
2_1_C06	het	1	0	0	0	0.232746	0.0483665	3.25049	0.134	0.525
2_1_C07	het	1	0	0	0	0.216558	0.0474961	3.2217	0.131	0.517
2_1_C09	het	1	0	0	0	0.215512	0.0512732	3.17715	0.123	0.48
2_1_C11	het	1	0	0	0	0.205547	0.0425149	3.04947	0.114	0.453
2_1_D02	het	1	0	0	0	0.220187	0.048113	3.19353	0.13	0.508
2_1_D03	het	1	0	0	0	0.207015	0.0512263	3.19742	0.112	0.476
2_1_D04	het	1	0	0	0	0.221895	0.047575	3.15698	0.129	0.509
2_1_D06	het	1	0	0	0	0.213869	0.0483478	3.1984	0.123	0.505
2_1_D08	het	1	0	0	0	0.214444	0.0460276	3.17965	0.11	0.487
2_1_D10	het	1	0	0	0	0.202538	0.0476337	3.10232	0.116	0.5
2_1_E03	het	1	0	0	0	0.215255	0.0464116	3.1509	0.114	0.478
2_1_E12	het	1	0	0	0	0.203305	0.039719	3.09064	0.101	0.477
2_1_F01	het	1	0	0	0	0.213062	0.0498542	3.17904	0.119	0.497
2_1_F07	het	1	0	0	0	0.215579	0.0512797	3.19196	0.117	0.512
2_1_F08	het	1	0	0	0	0.214382	0.0465727	3.14772	0.11	0.484
2_1_F09	het	1	0	0	0	0.210899	0.0464679	3.27842	0.123	0.516
2_1_G01	het	1	0	0	0	0.215372	0.049038	3.17213	0.118	0.486
2_1_G04	het	1	0	0	0	0.214608	0.0501601	3.14665	0.123	0.5
2_1_G10	het	1	0	0	0	0.223272	0.0476801	3.2549	0.131	0.502
2_1_H01	het	1	0	0	0	0.214488	0.049322	3.16059	0.122	0.5
2_1_H03	het	1	0	0	0	0.217574	0.0439573	3.08064	0.117	0.459
2_1_H06	het	1	0	0	0	0.224833	0.0486372	3.21046	0.128	0.516
2_1_H12	het	1	0	0	0	0.209693	0.0469082	3.08319	0.134	0.486
2_1_A01	hom	1	0	0	0	0.210609	0.0437309	3.27283	0.101	0.468
2_1_A03	hom	1	0	0	0	0.202832	0.0428603	3.10121	0.105	0.463
2_1_A12	hom	1	0	0	0	0.213174	0.0492454	3.12773	0.118	0.487
2_1_B02	hom	1	0	0	0	0.2168	0.0471684	3.15163	0.127	0.478
2_1_B03	hom	1	0	0	0	0.222623	0.0474856	3.23469	0.127	0.494
2_1_B06	hom	1	0	0	0	0.207695	0.0448403	3.03479	0.119	0.463
2_1_C02	hom	1	0	0	0	0.220124	0.0446851	3.2058	0.13	0.492
2_1_C04	hom	1	0	0	0	0.219301	0.0438093	3.09674	0.128	0.472
2_1_C05	hom	1	0	0	0	0.206954	0.04441	3.05804	0.112	0.445
2_1_E02	hom	1	0	0	0	0.210449	0.0446334	3.09437	0.129	0.482
2_1_E07	hom	1	0	0	0	0.215275	0.0466302	3.1625	0.125	0.494
2_1_G05	hom	1	0	0	0	0.225982	0.0454977	3.2106	0.123	0.493
2_1_G07	hom	1	0	0	0	0.213939	0.049831	3.21937	0.119	0.485
2_1_G08	hom	1	0	0	0	0.209224	0.0425886	3.06222	0.119	0.445
2_1_G11	hom	1	0	0	0	0.227183	0.0456577	3.21173	0.136	0.501
2_1_H04	hom	1	0	0	0	0.208624	0.0285512	3.15986	0.118	0.504
2_1_H07	hom	1	0	0	0	0.197147	0.048151	3.20817	0.142	0.531
2_1_H08	hom	1	0	0	0	0.212505	0.0440207	3.08161	0.125	0.472
2_1_A02	WT	1	0	0	0	0.215781	0.0447834	3.15499	0.116	0.478
2_1_A06	WT	1	0	0	0	0.204851	0.0448609	3.10393	0.112	0.477
2_1_A07	WT	1	0	0	0	0.220069	0.0516532	3.27232	0.125	0.492
2_1_B08	WT	1	0	0	0	0.21426	0.0445537	3.11446	0.11	0.483
2_1_B12	WT	1	0	0	0	0.221291	0.0491198	3.28067	0.123	0.499
2_1_D05	WT	1	0	0	0	0.217081	0.0458078	3.18079	0.125	0.478
2_1_D12	WT	1	0	0	0	0.21226	0.0492394	3.09424	0.121	0.494
2_1_E10	WT	1	0	0	0	0.209482	0.0424966	3.17085	0.112	0.446
2_1_E11	WT	1	0	0	0	0.204696	0.0403386	3.11929	0.105	0.444
2_1_F03	WT	1	0	0	0	0.210622	0.0487168	3.17308	0.127	0.501
2_1_F04	WT	1	0	0	0	0.204915	0.0423552	3.17943	0.118	0.467
2_1_F10	WT	1	0	0	0	0.205384	0.0401741	3.05524	0.106	0.468
2_1_G09	WT	1	0	0	0	0.19947	0.0422903	3.02158	0.106	0.441
2_1_G12	WT	1	0	0	0	0.208305	0.0470822	3.109	0.127	0.492
2_2_A11	het	1	0	0	0	0.204477	0.0422853	3.03841	0.106	0.472
2_2_C01	het	1	0	0	0	0.22325	0.0491987	3.27991	0.14	0.513
2_2_C07	het	1	0	0	0	0.200743	0.0382221	2.99938	0.116	0.45
2_2_C11	het	1	0	0	0	0.224322	0.0470502	3.15796	0.13	0.507
2_2_D05	het	1	0	0	0	0.213074	0.0444846	3.01597	0.132	0.483
2_2_D06	het	1	0	0	0	0.20719	0.0444044	3.15454	0.128	0.481
2_2_D09	het	1	0	0	0	0.203811	0.0414822	2.96986	0.125	0.476
2_2_D10	het	1	0	0	0	0.198419	0.042889	3.00757	0.125	0.444
2_2_D11	het	1	0	0	0	0.214638	0.0504599	3.17196	0.127	0.507
2_2_D12	het	1	0	0	0	0.227001	0.0473742	3.20858	0.127	0.494
2_2_E01	het	1	0	0	0	0.204856	0.0448307	3.12992	0.121	0.494
2_2_E02	het	1	0	0	0	0.206483	0.0456833	3.14403	0.123	0.483
2_2_E06	het	1	0	0	0	0.226823	0.0503957	3.31657	0.123	0.523
2_2_E07	het	1	0	0	0	0.209401	0.0429535	3.03385	0.127	0.48
2_2_E10	het	1	0	0	0	0.221394	0.0467967	3.1329	0.128	0.49
2_2_F02	het	1	0	0	0	0.203174	0.0461388	3.10144	0.114	0.458
2_2_F05	het	1	0	0	0	0.213508	0.0437711	3.19172	0.13	0.47
2_2_F08	het	1	0	0	0	0.203882	0.0455997	3.08817	0.123	0.465
2_2_G11	het	1	0	0	0	0.203047	0.0438777	3.02354	0.138	0.464
2_2_H06	het	1	0	0	0	0.186464	0.0367576	2.81409	0.129	0.338
2_2_H08	het	1	0	0	0	0.199115	0.0344425	2.83785	0.118	0.399
2_2_H10	het	1	0	0	0	0.194905	0.0375611	2.96495	0.113	0.444
2_2_A12	het	1	0	0	0	0.207689	0.0505058	3.03626	0.127	0.476
2_2_A07	hom	1	0	0	0	0.203972	0.0427276	3.04423	0.121	0.494
2_2_A08	hom	1	0	0	0	0.201743	0.041046	2.98719	0.121	0.471
2_2_A09	hom	1	0	0	0	0.210061	0.0441457	3.07137	0.128	0.472
2_2_B01	hom	1	0	0	0	0.195944	0.0401536	2.9527	0.116	0.439
2_2_B05	hom	1	0	0	0	0.211528	0.0472841	3.1465	0.127	0.487
2_2_B06	hom	1	0	0	0	0.214244	0.0482533	3.18886	0.132	0.491
2_2_B08	hom	1	0	0	0	0.200735	0.0420807	2.9537	0.123	0.472
2_2_B12	hom	1	0	0	0	0.221616	0.0448424	3.08863	0.132	0.496
2_2_C04	hom	1	0	0	0	0.207065	0.0416652	2.9889	0.128	0.477
2_2_D03	hom	1	0	0	0	0.21447	0.0441145	3.09334	0.125	0.499
2_2_D04	hom	1	0	0	0	0.220818	0.0456986	3.11998	0.123	0.494
2_2_E04	hom	1	0	0	0	0.198614	0.0456353	3.2383	0.106	0.464
2_2_E08	hom	1	0	0	0	0.212608	0.040735	3.10487	0.119	0.459
2_2_F04	hom	1	0	0	0	0.202644	0.0405581	3.03441	0.121	0.463
2_2_F06	hom	1	0	0	0	0.219933	0.0438022	3.1813	0.116	0.48
2_2_F09	hom	1	0	0	0	0.187896	0.0354791	2.87081	0.11	0.4
2_2_G04	hom	1	0	0	0	0.185404	0.033229	2.79132	0.11	0.367
2_2_G07	hom	1	0	0	0	0.198452	0.0358537	2.74222	0.122	0.381
2_2_G08	hom	1	0	0	0	0.194198	0.039212	2.90952	0.114	0.357
2_2_H05	hom	1	0	0	0	0.206132	0.0405205	2.85238	0.123	0.429
2_2_A02	WT	1	0	0	0	0.207678	0.047559	3.14648	0.116	0.472
2_2_A03	WT	1	0	0	0	0.203742	0.0454586	3.04792	0.117	0.47
2_2_A05	WT	1	0	0	0	0.194943	0.0434283	2.93539	0.117	0.455
2_2_A06	WT	1	0	0	0	0.213679	0.0472695	3.24079	0.124	0.488
2_2_B02	WT	1	0	0	0	0.202707	0.0393095	3.07474	0.101	0.453
2_2_B04	WT	1	0	0	0	0.221333	0.0479019	3.13514	0.138	0.496
2_2_B11	WT	1	0	0	0	0.214883	0.0428059	3.12696	0.112	0.478
2_2_C03	WT	1	0	0	0	0.179585	0.0379209	3.00256	0.111	0.42
2_2_C05	WT	1	0	0	0	0.205177	0.045263	3.14451	0.125	0.475
2_2_D02	WT	1	0	0	0	0.216453	0.0442756	3.1473	0.128	0.482
2_2_D08	WT	1	0	0	0	0.194865	0.0385709	3.04732	0.118	0.442
2_2_E05	WT	1	0	0	0	0.226169	0.0506887	3.30064	0.121	0.506
2_2_F03	WT	1	0	0	0	0.210682	0.0459108	3.12914	0.141	0.486
2_2_G03	WT	1	0	0	0	0.199697	0.0365065	2.91126	0.095	0.351
2_2_G09	WT	1	0	0	0	0.199472	0.0320808	2.86121	0.087	0.381
2_2_H09	WT	1	0	0	0	0.195035	0.0336288	2.8064	0.138	0.349
2_1_A04	het	0	1	1	0						20.6282	51.1561
2_1_A09	het	0	1	1	0						66.4669	28.4522
2_1_A10	het	0	1	1	0	0.234514	0.0565866	3.42785	0.09	0.511	3.46164	6.29097
2_1_A11	het	0	1	1	0						4.03054	10.0973
2_1_B09	het	0	1	1	0	0.241744	0.0567449	3.6348	0.135	0.495	1.9458	0.59299
2_1_B10	het	0	1	1	0	0.233108	0.0559103	3.6209	0.108	0.495	2.58806	0.0147334
2_1_B11	het	0	1	1	0						6.4639	0.705087
2_1_C03	het	0	1	1	0	0.231691	0.0542852	3.59436	0.107	0.504	7.6548	0.383456
2_1_C06	het	0	1	1	0						6.31303	7.51179
2_1_C07	het	0	1	1	0						2.67571	0.76178
2_1_C09	het	0	1	1	0						2.15457	0.165624
2_1_C11	het	0	1	1	0						6.20156	0.830813
2_1_D02	het	0	1	1	0						49.4109	145.819
2_1_D03	het	0	1	1	0						0.780056	1.48753
2_1_D04	het	0	1	1	0	0.236681	0.055717	3.54356	0.092	0.523	7.13841	2.10038
2_1_D06	het	0	1	1	0						29.6008	55.7999
2_1_D08	het	0	1	1	0						3.71713	0.16968
2_1_D10	het	0	1	1	0	0.239628	0.0654337	3.57966	0.121	0.504	5.34821	2.25756
2_1_E03	het	0	1	1	0						14.6285	13.472
2_1_E08	het	0	1	1	0						7.0931	2.27014
2_1_E12	het	0	1	1	0						15.7949	35.665
2_1_F07	het	0	1	1	0	0.224332	0.0473389	3.41692	0.138	0.497	25.9781	23.6064
2_1_F08	het	0	1	1	0	0.236352	0.051572	3.49733	0.105	0.493	10.9934	7.69347
2_1_F09	het	0	1	1	0	0.236682	0.0552403	3.57866	0.109	0.499	2.83111	3.69079
2_1_G01	het	0	1	1	0	0.241824	0.0584445	3.6095	0.125	0.51	24.4147	59.0867
2_1_G04	het	0	1	1	0	0.231323	0.0495268	3.48463	0.12	0.505	17.6677	25.0768
2_1_G10	het	0	1	1	0						4.42103	0.0887911
2_1_H01	het	0	1	1	0						58.0412	24.722
2_1_H03	het	0	1	1	0	0.228299	0.0491831	3.38986	0.118	0.492	0.137211	0.0630515
2_1_H05	het	0	1	1	0						32.4389	106.071
2_1_H06	het	0	1	1	0						9.67218	8.75117
2_1_H09	het	0	1	1	0						2.90311	2.55402
2_1_H12	het	0	1	1	0						6.48022	6.20864
2_1_A01	hom	0	1	1	0						4.20537	14.8801
2_1_A03	hom	0	1	1	0						3.93096	11.5075
2_1_A12	hom	0	1	1	0						5.88321	16.9628
2_1_B02	hom	0	1	1	0						2.52977	0.705155
2_1_B03	hom	0	1	1	0						4.80534	1.91149
2_1_B05	hom	0	1	1	0						7.75725	23.3024
2_1_B06	hom	0	1	1	0	0.245609	0.0607129	3.51818	0.136	0.485	12.9115	22.8432
2_1_C02	hom	0	1	1	0						17.9617	18.8434
2_1_C04	hom	0	1	1	0	0.240674	0.0601006	3.5703	0.136	0.489	10.1772	21.2966
2_1_C05	hom	0	1	1	0	0.220511	0.0476806	3.40905	0.127	0.492	1.06333	0.0568515
2_1_E02	hom	0	1	1	0	0.240022	0.0562019	3.41884	0.134	0.493	10.1751	14.77
2_1_E07	hom	0	1	1	0	0.241673	0.0593767	3.60762	0.131	0.515	7.7063	0.243245
2_1_G05	hom	0	1	1	0						3.59207	0.511473
2_1_G07	hom	0	1	1	0						17.5001	0
2_1_G08	hom	0	1	1	0						4.3387	0.400632
2_1_G11	hom	0	1	1	0	0.228882	0.0538742	3.59732	0.116	0.498	5.52863	1.19767
2_1_H04	hom	0	1	1	0	0.236628	0.0570668	3.57032	0.128	0.492	1.88942	4.67604
2_1_H07	hom	0	1	1	0						10.2531	1.48542
2_1_H08	hom	0	1	1	0	0.233015	0.0559098	3.50686	0.134	0.497	6.15004	5.94222
2_1_A02	WT	0	1	1	0	0.238515	0.0577956	3.57275	0.125	0.496	1.34541	4.70441
2_1_A06	WT	0	1	1	0						3.82778	13.1589
2_1_A07	WT	0	1	1	0						4.77809	16.2415
2_1_B08	WT	0	1	1	0						3.14696	0.893796
2_1_B12	WT	0	1	1	0	0.239551	0.0572146	3.66252	0.115	0.503	11.0139	7.48407
2_1_C12	WT	0	1	1	0						5.10065	10.9378
2_1_D05	WT	0	1	1	0						3.20718	0.232135
2_1_D07	WT	0	1	1	0						15.1934	3.14371
2_1_D12	WT	0	1	1	0	0.235951	0.0569604	3.49077	0.116	0.511	1.15579	1.92352
2_1_E10	WT	0	1	1	0						2.96728	1.1536
2_1_E11	WT	0	1	1	0						2.20852	0.323412
2_1_F03	WT	0	1	1	0						6.36526	0.0586005
2_1_F06	WT	0	1	1	0	0.235017	0.0503929	3.56877	0.131	0.493	6.47555	0.496358
2_1_F10	WT	0	1	1	0	0.232657	0.0547765	3.5386	0.106	0.492	7.35898	0.396346
2_1_F12	WT	0	1	1	0						4.07852	0.710332
2_1_G09	WT	0	1	1	0	0.231172	0.0558384	3.45402	0.128	0.488	3.45911	9.30227
2_1_G12	WT	0	1	1	0	0.229227	0.0505058	3.50101	0.117	0.485	3.6923	0
2_2_A11	het	0	1	1	0						27.7367	44.8588
2_2_C01	het	0	1	1	0						5.398	12.737
2_2_C07	het	0	1	1	0	0.224934	0.049412	3.44265	0.11	0.483	19.3394	69.4722
2_2_C11	het	0	1	1	0						7.61997	10.4845
2_2_D01	het	0	1	1	0	0.231598	0.0513692	3.55718	0.114	0.498
2_2_D05	het	0	1	1	0	0.235023	0.0549185	3.37731	0.125	0.48	1.42733	4.92416
2_2_D06	het	0	1	1	0						4.24574	10.9632
2_2_D09	het	0	1	1	0	0.22251	0.0498709	3.35514	0.086	0.498	3.60677	14.1038
2_2_D10	het	0	1	1	0	0.212399	0.0490885	3.37601	0.138	0.475	3.78373	11.9846
2_2_D11	het	0	1	1	0	0.230221	0.0558033	3.47975	0.13	0.487	7.47824	8.51126
2_2_D12	het	0	1	1	0						21.5982	47.2436
2_2_E01	het	0	1	1	0	0.248007	0.0617218	3.68015	0.129	0.507	9.91272	27.6308
2_2_E02	het	0	1	1	0	0.221538	0.0483348	3.47395	0.131	0.479	3.78664	11.374
2_2_E06	het	0	1	1	0						5.27197	10.7395
2_2_E07	het	0	1	1	0	0.236546	0.0531265	3.56068	0.115	0.478	1.80343	6.21967
2_2_E10	het	0	1	1	0						1.09415	1.09453
2_2_F02	het	0	1	1	0	0.230642	0.0557565	3.58329	0.132	0.507
2_2_F08	het	0	1	1	0	0.225699	0.0512338	3.53449	0.125	0.481	5.31555	2.36497
2_2_G10	het	0	1	1	0	0.219534	0.050549	3.42486	0.125	0.465
2_2_G11	het	0	1	1	0	0.225765	0.0556473	3.51848	0.114	0.499
2_2_H06	het	0	1	1	0	0.212418	0.0510566	3.39019	0.125	0.459	11.6703	19.6964
2_2_H08	het	0	1	1	0	0.223297	0.0559114	3.44268	0.118	0.466	5.49408	20.5427
2_2_H10	het	0	1	1	0	0.222266	0.0541737	3.46649	0.136	0.474	3.22342	11.3059
2_2_A12	het	0	1	1	0	0.227003	0.0540933	3.36057	0.09	0.501	47.8708	95.5705
2_2_A01	hom	0	1	1	0						8.62406	31.3981
2_2_A07	hom	0	1	1	0	0.229883	0.0501428	3.30211	0.123	0.472	0.276248	0.921064
2_2_A08	hom	0	1	1	0	0.206348	0.0428064	3.24855	0.158	0.54	4.59796	3.99563
2_2_A09	hom	0	1	1	0	0.225963	0.0509114	3.55688	0.121	0.482	11.0025	16.8487
2_2_B01	hom	0	1	1	0						2.31197	6.95351
2_2_B05	hom	0	1	1	0	0.23376	0.0563809	3.58355	0.097	0.097	43.2932	153.895
2_2_B06	hom	0	1	1	0						41.0813	157.641
2_2_B08	hom	0	1	1	0	0.22597	0.047917	3.28576	0.097	0.097	12.3901	43.0662
2_2_B12	hom	0	1	1	0	0.229335	0.0510904	3.35045	0.123	0.495
2_2_C04	hom	0	1	1	0	0.232669	0.0532504	3.41239	0.116	0.491	3.43208	13.188
2_2_D03	hom	0	1	1	0						39.3654	95.9915
2_2_D04	hom	0	1	1	0	0.224653	0.0531874	3.58748	0.075	0.502
2_2_E04	hom	0	1	1	0	0.241215	0.0573361	3.74813	0.144	0.499	10.3602	34.8683
2_2_E08	hom	0	1	1	0	0.228494	0.0532357	3.55728	0.123	0.487	7.02147	27.9894
2_2_F04	hom	0	1	1	0	0.223277	0.0525442	3.49127	0.108	0.486	5.3055	15.7846
2_2_F06	hom	0	1	1	0	0.228336	0.0544169	3.45831	0.127	0.472	1.1723	0.220635
2_2_F09	hom	0	1	1	0	0.226132	0.0511725	3.44473	0.112	0.474	2.58556	8.62587
2_2_G04	hom	0	1	1	0	0.219541	0.0499498	3.38124	0.128	0.466	6.00746	21.147
2_2_G07	hom	0	1	1	0	0.23396	0.0524785	3.1348	0.133	0.458	0.748672	0.617935
2_2_G08	hom	0	1	1	0	0.221711	0.0513429	3.46547	0.128	0.455	2.29822	5.24979
2_2_H05	hom	0	1	1	0	0.234976	0.0561574	3.42254	0.13	0.475	4.58829	10.6692
2_2_H11	hom	0	1	1	0	0.228482	0.0532522	3.51238	0.13	0.472	15.182	29.8698
2_2_A02	WT	0	1	1	0						0.838518	0.666351
2_2_A03	WT	0	1	1	0	0.230362	0.0523576	3.38586	0.101	0.499	3.96312	11.1038
2_2_B02	WT	0	1	1	0	0.22248	0.0512714	3.49527	0.097	0.484
2_2_B04	WT	0	1	1	0						6.66818	16.9614
2_2_B11	WT	0	1	1	0	0.227612	0.0504656	3.46454	0.141	0.483
2_2_C03	WT	0	1	1	0	0.223389	0.0505816	3.57401	0.106	0.496	7.66119	16.9937
2_2_C05	WT	0	1	1	0	0.235632	0.0538265	3.59271	0.123	0.487	8.63001	25.629
2_2_D02	WT	0	1	1	0	0.248329	0.0618935	3.61181	0.134	0.498	7.19109	20.0103
2_2_D08	WT	0	1	1	0						2.90798	8.76979
2_2_E05	WT	0	1	1	0						10.9849	35.5886
2_2_F03	WT	0	1	1	0	0.233081	0.054266	3.49926	0.14	0.478	16.7048	26.8792
2_2_G03	WT	0	1	1	0	0.22443	0.0486591	3.54785	0.119	0.471	0.379811	0.559005
2_2_G09	WT	0	1	1	0	0.201917	0.0410448	3.15728	0.118	0.448	1.50419	4.88617
2_2_H09	WT	0	1	1	0	0.220409	0.0501182	3.47791	0.131	0.458	4.14572	14.0761
2_2_H12	WT	0	1	1	0	0.209515	0.0437931	3.17949	0.141	0.57	3.27538	2.65676
3_1_B04	het	1	0	0	0	0.18789	0.0409395	3.06055	0.105	0.433
3_1_B06	het	1	0	0	0	0.192555	0.0364592	3.04439	0.112	0.439
3_1_B07	het	1	0	0	0	0.205173	0.0438317	2.97552	0.138	0.461
3_1_C04	het	1	0	0	0	0.202859	0.0373065	2.9449	0.114	0.429
3_1_C05	het	1	0	0	0	0.19026	0.0396088	2.97465	0.108	0.428
3_1_C06	het	1	0	0	0	0.20779	0.0421099	3.04947	0.114	0.476
3_1_C10	het	1	0	0	0	0.208906	0.0468221	3.0942	0.119	0.477
3_1_D02	het	1	0	0	0	0.216539	0.0469411	3.04217	0.137	0.473
3_1_D04	het	1	0	0	0	0.204021	0.0387251	2.97826	0.128	0.461
3_1_D12	het	1	0	0	0	0.20348	0.0429546	3.06716	0.097	0.458
3_1_E09	het	1	0	0	0	0.195015	0.0365367	3.03209	0.099	0.428
3_1_F04	het	1	0	0	0	0.19997	0.0416172	3.07459	0.109	0.423
3_1_F05	het	1	0	0	0	0.198407	0.0388153	3.01744	0.117	0.447
3_1_F08	het	1	0	0	0	0.186172	0.0328486	2.8397	0.096	0.356
3_1_F09	het	1	0	0	0	0.202109	0.043698	3.07033	0.125	0.467
3_1_F10	het	1	0	0	0	0.191061	0.0354494	2.86961	0.112	0.431
3_1_F11	het	1	0	0	0	0.196132	0.0377349	2.96421	0.109	0.379
3_1_G10	het	1	0	0	0	0.197835	0.0408874	3.00682	0.123	0.446
3_1_H10	het	1	0	0	0	0.185242	0.0322719	2.87518	0.108	0.41
3_1_B05	hom	1	0	0	0	0.195864	0.0366907	2.95856	0.119	0.437
3_1_B10	hom	1	0	0	0	0.20992	0.0397497	3.05604	0.118	0.447
3_1_B11	hom	1	0	0	0	0.207019	0.0367212	3.02748	0.123	0.442
3_1_C01	hom	1	0	0	0	0.205508	0.0412232	3.10835	0.123	0.479
3_1_C03	hom	1	0	0	0	0.202482	0.043702	3.11213	0.114	0.472
3_1_C12	hom	1	0	0	0	0.205421	0.0395134	3.05726	0.129	0.45
3_1_D08	hom	1	0	0	0	0.174782	0.0270996	2.75091	0.103	0.342
3_1_G11	hom	1	0	0	0	0.192843	0.04062	2.94352	0.114	0.438
3_1_H04	hom	1	0	0	0	0.214368	0.0458295	3.08928	0.119	0.481
3_1_B08	WT	1	0	0	0	0.208822	0.0454157	3.11981	0.125	0.455
3_1_B09	WT	1	0	0	0	0.210256	0.0434272	3.1023	0.121	0.454
3_1_C09	WT	1	0	0	0	0.220876	0.0445332	3.12613	0.119	0.477
3_1_D10	WT	1	0	0	0	0.190284	0.0374803	2.78105	0.101	0.436
3_1_E01	WT	1	0	0	0	0.203909	0.0452437	3.04205	0.123	0.452
3_1_E07	WT	1	0	0	0	0.196603	0.0387623	2.96027	0.128	0.443
3_1_H09	WT	1	0	0	0	0.208909	0.0459891	2.95418	0.13	0.432
3_1_H11	WT	1	0	0	0	0.224214	0.04794	3.10511	0.116	0.466
3_2_A01	het	1	0	0	0	0.211759	0.0416585	3.0636	0.119	0.474
3_2_A04	het	1	0	0	0	0.203298	0.0461795	3.09022	0.119	0.492
3_2_A05	het	1	0	0	0	0.203261	0.0412607	3.00859	0.112	0.449
3_2_B09	het	1	0	0	0	0.205907	0.0437027	3.11785	0.136	0.465
3_2_B10	het	1	0	0	0	0.209976	0.0482904	3.16121	0.114	0.479
3_2_B12	het	1	0	0	0	0.195179	0.0398498	3.03367	0.11	0.461
3_2_C07	het	1	0	0	0	0.199423	0.0414164	3.05386	0.123	0.458
3_2_C12	het	1	0	0	0	0.212802	0.0422336	3.12342	0.12	0.445
3_2_D07	het	1	0	0	0	0.206813	0.042359	3.07138	0.116	0.464
3_2_D11	het	1	0	0	0	0.19066	0.0380816	2.93617	0.118	0.457
3_2_E01	het	1	0	0	0	0.201981	0.039224	3.03054	0.119	0.457
3_2_E03	het	1	0	0	0	0.208541	0.0440798	3.13752	0.133	0.47
3_2_E06	het	1	0	0	0	0.194974	0.0413657	3.06509	0.118	0.457
3_2_F08	het	1	0	0	0	0.209488	0.0461947	3.14805	0.123	0.469
3_2_F10	het	1	0	0	0	0.201274	0.0413646	3.03372	0.132	0.439
3_2_F12	het	1	0	0	0	0.211084	0.0432685	3.08053	0.136	0.472
3_2_G02	het	1	0	0	0	0.208015	0.0423535	3.07859	0.106	0.468
3_2_G10	het	1	0	0	0	0.195812	0.0437346	2.96921	0.127	0.454
3_2_G11	het	1	0	0	0	0.20462	0.0459439	3.12858	0.128	0.45
3_2_G12	het	1	0	0	0	0.204867	0.046839	3.05619	0.134	0.468
3_2_H02	het	1	0	0	0	0.214562	0.0446389	3.07919	0.124	0.471
3_2_D09	hom	1	0	0	0	0.213675	0.0417193	3.06025	0.134	0.474
3_2_B08	hom	1	0	0	0	0.201113	0.0407178	3.11069	0.117	0.46
3_2_C01	hom	1	0	0	0	0.204083	0.0405315	2.98389	0.12	0.436
3_2_C03	hom	1	0	0	0	0.204994	0.0408156	2.97766	0.118	0.446
3_2_D03	hom	1	0	0	0	0.196106	0.0375722	3.04914	0.11	0.456
3_2_D05	hom	1	0	0	0	0.198601	0.02936	2.92221	0.128	0.422
3_2_D08	hom	1	0	0	0	0.165036	0.0296744	2.37234	0.075	0.384
3_2_E10	hom	1	0	0	0	0.198032	0.0415137	3.06154	0.125	0.461
3_2_F11	hom	1	0	0	0	0.202366	0.0406503	3.03819	0.114	0.455
3_2_H11	hom	1	0	0	0	0.206766	0.0466493	3.1295	0.123	0.46
3_2_B03	WT	1	0	0	0	0.20019	0.0432533	3.0339	0.127	0.46
3_2_B05	WT	1	0	0	0	0.206003	0.0457176	3.11222	0.119	0.488
3_2_B06	WT	1	0	0	0	0.196933	0.0397273	3.08782	0.11	0.444
3_2_C04	WT	1	0	0	0	0.196577	0.0351359	2.93304	0.118	0.421
3_2_C08	WT	1	0	0	0	0.197407	0.0387608	3.03612	0.125	0.453
3_2_E02	WT	1	0	0	0	0.201229	0.0399998	3.06433	0.122	0.455
3_2_E11	WT	1	0	0	0	0.199725	0.0373891	3.03334	0.117	0.446
3_2_E12	WT	1	0	0	0	0.196622	0.0408293	3.01379	0.13	0.453
3_2_H06	WT	1	0	0	0	0.195149	0.0396686	3.02506	0.124	0.456
3_1_B04	het	0	1	1	10	0.227844	0.0524366	3.52477	0.099	0.486	151.356	87.1915
3_1_B06	het	0	1	1	10	0.22323	0.0503836	3.52913	0.081	0.486	204.293	153.909
3_1_B07	het	0	1	1	10	0.2251	0.0532759	3.38706	0.103	0.475	166.946	117.309
3_1_C04	het	0	1	1	10	0.245862	0.0574924	3.39687	0.121	0.483	115.356	61.0417
3_1_C05	het	0	1	1	10						194.533	135.212
3_1_C06	het	0	1	1	10						185.282	137.288
3_1_C10	het	0	1	1	10						238.507	200.336
3_1_D02	het	0	1	1	10	0.234158	0.0579387	3.52697	0.114	0.475	221.831	179.005
3_1_D04	het	0	1	1	10	0.230932	0.0519861	3.4803	0.097	0.47	179.752	124.942
3_1_D12	het	0	1	1	10	0.22576	0.050827	3.36637	0.105	0.463	171.681	127.699
3_1_E09	het	0	1	1	10	0.233623	0.0521614	3.52248	0.123	0.457	193.547	150.952
3_1_E11	het	0	1	1	10	0.239702	0.0547799	3.48133	0.128	0.468	176.718	146.305
3_1_F04	het	0	1	1	10						158.815	118.22
3_1_F05	het	0	1	1	10						244.339	213.428
3_1_F06	het	0	1	1	10	0.228929	0.0545425	3.43298	0.088	0.505	156.219	122.047
3_1_F08	het	0	1	1	10						100.519	45.4704
3_1_F09	het	0	1	1	10	0.230213	0.058371	3.56503	0.114	0.483	188.927	178.464
3_1_F10	het	0	1	1	10	0.218755	0.0512784	3.30804	0.11	0.472	110.928	45.2544
3_1_F11	het	0	1	1	10	0.216417	0.0439802	3.30531	0.118	0.464	132.159	66.9406
3_1_G10	het	0	1	1	10	0.22638	0.0526778	3.50138	0.123	0.488	146.168	110.329
3_1_H10	het	0	1	1	10	0.223807	0.0507972	3.23844	0.114	0.459	103.715	72.1916
3_1_B05	hom	0	1	1	10	0.227676	0.0525463	3.43927	0.084	0.49	155.302	86.5052
3_1_B10	hom	0	1	1	10	0.225953	0.0533262	3.47924	0.096	0.484	213.786	188.856
3_1_B11	hom	0	1	1	10	0.225775	0.0518437	3.46566	0.079	0.492	186.833	178.677
3_1_C01	hom	0	1	1	10	0.237344	0.0607091	3.59447	0.105	0.485	235.869	212.688
3_1_C03	hom	0	1	1	10						189.298	164.401
3_1_C12	hom	0	1	1	10						168.079	136.902
3_1_D08	hom	0	1	1	10	0.180449	0.0314968	3.01491	0.18	0.556
3_1_F07	hom	0	1	1	10	0.234658	0.0509048	3.44108	0.106	0.477	166.965	141.547
3_1_G08	hom	0	1	1	10						161.639	172.71
3_1_G11	hom	0	1	1	10	0.211177	0.0501456	3.37306	0.134	0.496	140.985	144.464
3_1_H04	hom	0	1	1	10	0.24752	0.0535081	3.50881	0.114	0.494	196.436	176.227
3_1_B08	WT	0	1	1	10						191.022	119.186
3_1_B09	WT	0	1	1	10	0.237982	0.0523313	3.55691	0.112	0.464	203.154	109.31
3_1_B12	WT	0	1	1	10						188.077	168.029
3_1_C09	WT	0	1	1	10	0.244561	0.055787	3.58246	0.108	0.499	214.787	187.031
3_1_D10	WT	0	1	1	10	0.176143	0.0326045	2.68064	0.136	0.55	13.9248	13.4512
3_1_E01	WT	0	1	1	10						219.376	170.397
3_1_E07	WT	0	1	1	10	0.228512	0.0529884	3.50856	0.097	0.485	157.924	145.791
3_1_H09	WT	0	1	1	10	0.234611	0.0542473	3.39212	0.13	0.483	148.134	133.978
3_1_H11	WT	0	1	1	10						191.184	164.31
3_2_A01	het	0	1	1	0						44.2928	77.6264
3_2_A04	het	0	1	1	0	0.230211	0.0548009	3.54952	0.053	0.527	16.9822	40.8332
3_2_A05	het	0	1	1	0	0.22968	0.0538794	3.54564	0.13	0.473	3.74908	#DIV/0!
3_2_A06	het	0	1	1	0	0.232897	0.0563907	3.58998	0.107	0.479
3_2_B09	het	0	1	1	0						44.2215	128.696
3_2_B10	het	0	1	1	0	0.236077	0.0532116	3.63937	0.143	0.47
3_2_B12	het	0	1	1	0	0.227177	0.0530171	3.5911	0.079	0.512	9.18221	9.73596
3_2_C07	het	0	1	1	0	0.23253	0.0536942	3.53242	0.114	0.496	4.31803	0.180631
3_2_C12	het	0	1	1	0						3.12744	2.11675
3_2_D07	het	0	1	1	0	0.225139	0.0541598	3.45361	0.125	0.495	1.15128	0.64277
3_2_D11	het	0	1	1	0	0.224951	0.0501337	3.35279	0.127	0.487
3_2_E01	het	0	1	1	0	0.225981	0.0543079	3.50252	0.132	0.483	4.61032	0
3_2_E03	het	0	1	1	0						6.45755	0.979903
3_2_E06	het	0	1	1	0	0.23486	0.0548115	3.5764	0.136	0.467	11.0794	10.5566
3_2_F08	het	0	1	1	0	0.222684	0.052787	3.61519	0.132	0.489	1.81961	4.19681
3_2_F12	het	0	1	1	0						6.24557	7.41526
3_2_G02	het	0	1	1	0						15.2809	24.1172
3_2_G10	het	0	1	1	0	0.227697	0.0520721	3.44206	0.103	0.504	2.06041	0.013454
3_2_G11	het	0	1	1	0						16.5619	7.54777
3_2_G12	het	0	1	1	0	0.228828	0.0557251	3.53192	0.134	0.488	58.2244	215.827
3_2_H02	het	0	1	1	0	0.231286	0.0501358	3.52521	0.12	0.477	3.71935	0.167902
3_2_B08	hom	0	1	1	0	0.241713	0.0505584	3.58525	0.141	0.48	9.99098	0
3_2_C01	hom	0	1	1	0	0.219749	0.0453873	3.34388	0.133	0.542	7.48028	2.77886
3_2_C03	hom	0	1	1	0	0.212091	0.047714	3.44861	0.132	0.455	5.69137	1.16734
3_2_D03	hom	0	1	1	0	0.225923	0.0513103	3.50898	0.092	0.501	1.89487	0.103732
3_2_D05	hom	0	1	1	0	0.227833	0.0415077	3.29931	0.183	0.496
3_2_D08	hom	0	1	1	0	0.158761	0.022943	2.46488	0.119	0.595
3_2_D09	hom	0	1	1	0	0.236443	0.0569194	3.49718	0.136	0.474	8.31896	2.99643
3_2_E10	hom	0	1	1	0	0.227862	0.0526003	3.47567	0.124	0.492	12.4903	36.6316
3_2_F11	hom	0	1	1	0	0.234284	0.0542376	3.5509	0.09	0.499	2.50224	1.49347
3_2_H11	hom	0	1	1	0	0.227691	0.0519243	3.5815	0.128	0.485	5.83523	1.07413
3_2_B03	WT	0	1	1	0	0.223945	0.0504626	3.52238	0.134	0.488
3_2_B05	WT	0	1	1	0	0.250267	0.0546664	3.60323	0.149	0.486	5.01257	0.25926
3_2_B06	WT	0	1	1	0						3.55883	0.014443
3_2_C04	WT	0	1	1	0	0.220421	0.0479364	3.48566	0.114	0.488	7.50712	0.231859
3_2_C08	WT	0	1	1	0	0.227316	0.0529593	3.59935	0.123	0.486
3_2_E02	WT	0	1	1	0	0.222908	0.0509123	3.52568	0.129	0.481	7.14381	0.442963
3_2_E11	WT	0	1	1	0	0.224473	0.0517275	3.49159	0.119	0.49
3_2_E12	WT	0	1	1	0	0.224651	0.0529357	3.49983	0.12	0.487
3_2_H06	WT	0	1	1	0	0.22855	0.0555639	3.54564	0.149	0.483

## Sheet: S8
Table S8. Summary of mosaic slc7a5 'pool' mutant larvae morphometric and behavioral data
Fish features		Treatments				VAST morphometric measurements					DanioVision behavioral measurements
FishID 3dpf	Genotype	VAST 3dpf	VAST 5dpf	Behavior	PTZ concentration (mM)	Area of first eye (mm^2)	Area of second eye (mm^2)	Length (mm)	Tel (mm)	OT (mm)	Average movement in 1h (mm/min)	Average movement last 15 min (mm/min)
1_1_A02	mock	1	0	0	0	0.0508593	0.0481362	3.16682	0.1575	0.509
1_1_A09	pool	1	0	0	0	0.0383587	0.0386523	2.88766	0.12675	0.441
1_1_B02	mock	1	0	0	0	0.0290436	0.0300468	2.91798	0.159	0.417
1_1_B06	mock	1	0	0	0	0.0528214	0.0519413	3.13922	0.16575	0.535
1_1_B08	pool	1	0	0	0	0.0337155	0.0392015	2.91791	0.14775	0.467
1_1_B11	pool	1	0	0	0	0.0471838	0.0471589	3.24293	0.171	0.523
1_1_B12	pool	1	0	0	0	0.0221015	0.0209641	2.85498	0.11625	0.4
1_1_C02	mock	1	0	0	0	0.0436499	0.0432834	3.00035	0.15975	0.498
1_1_C03	mock	1	0	0	0	0.0448144	0.046021	3.10279	0.1605	0.497
1_1_C04	mock	1	0	0	0	0.0451252	0.0416252	3.11591	0.1545	0.499
1_1_C06	mock	1	0	0	0	0.0507635	0.0492467	3.20468	0.1605	0.512
1_1_C11	pool	1	0	0	0	0.046009	0.0495693	2.8616	0.18225	0.509
1_1_C12	pool	1	0	0	0	0.0463676	0.0486913	2.89228	0.1545	0.508
1_1_D04	mock	1	0	0	0	0.0435999	0.0433112	3.12579	0.1515	0.491
1_1_D11	pool	1	0	0	0	0.0464124	0.0490312	2.96964	0.168	0.515
1_1_E02	mock	1	0	0	0	0.039138	0.037899	2.99431	0.153	0.473
1_1_E05	mock	1	0	0	0	0.0401164	0.0409675	2.98484	0.1455	0.494
1_1_E06	mock	1	0	0	0	0.0400993	0.0407114	3.01804	0.16125	0.468
1_1_E07	pool	1	0	0	0	0.0400782	0.0420705	2.88946	0.159	0.479
1_1_E09	pool	1	0	0	0	0.041128	0.0382834	2.8678	0.15825	0.471
1_1_F01	mock	1	0	0	0	0.0478358	0.0478448	3.23604	0.16125	0.505
1_1_F10	pool	1	0	0	0	0.0394139	0.0434809	3.00839	0.15525	0.512
1_1_F11	pool	1	0	0	0	0.0433496	0.0435396	3.06279	0.1545	0.48
1_1_G09	pool	1	0	0	0	0.0186614	0.022552	2.39812	0.12225	0.377
1_1_G10	pool	1	0	0	0	0.0283748	0.0233106	3.02278	0.15375	0.422
1_1_G12	pool	1	0	0	0	0.0469308	0.0463311	2.95711	0.162	0.533
1_1_H07	pool	1	0	0	0	0.0194221	0.0190934	2.67068	0.1485	0.383
1_1_A03	mock	1	0	0	0	0.040081	0.0415126	3.03472	0.159	0.497
1_1_A04	mock	1	0	0	0	0.0492811	0.0552938	3.19276	0.1545	0.52
1_1_A05	mock	1	0	0	0	0.0355376	0.0360692	2.86644	0.16275	0.449
1_1_A06	mock	1	0	0	0	0.0385577	0.0445979	3.1755	0.156	0.526
1_1_A07	pool	1	0	0	0	0.042189	0.0477213	3.06825	0.16275	0.502
1_1_A08	pool	1	0	0	0	0.0437782	0.0457902	3.10238	0.1545	0.492
1_1_A11	pool	1	0	0	0	0.0443914	0.0474791	2.68716	0.1695	0.491
1_1_B01	mock	1	0	0	0	0.0443983	0.0370624	3.10549	0.153	0.513
1_1_B03	mock	1	0	0	0	0.0284899	0.0254955	2.91969	0.1365	0.378
1_1_B04	mock	1	0	0	0	0.0446789	0.0454984	3.16625	0.15075	0.498
1_1_B05	mock	1	0	0	0	0.0430592	0.047142	3.01065	0.1545	0.507
1_1_B07	mock	1	0	0	0	0.0418927	0.0367198	2.91681	0.14475	0.487
1_1_B09	pool	1	0	0	0	0.0387473	0.0423299	2.98957	0.15375	0.504
1_1_C05	mock	1	0	0	0	0.0503189	0.05075	3.1574	0.15825	0.53
1_1_C08	pool	1	0	0	0	0.0425953	0.0378131	2.91191	0.19275	0.549
1_1_C09	pool	1	0	0	0	0.0429742	0.0443998	2.65097	0.177	0.498
1_1_C10	pool	1	0	0	0	0.0350886	0.0245795	2.78804	0.16275	0.474
1_1_D02	mock	1	0	0	0	0.0266098	0.0257484	3.04845	0.15675	0.41
1_1_D03	mock	1	0	0	0	0.029612	0.0300811	2.80781	0.14025	0.41
1_1_D07	pool	1	0	0	0	0.0379192	0.0397809	2.96262	0.16125	0.491
1_1_D08	pool	1	0	0	0	0.0402215	0.0404381	3.01463	0.14625	0.477
1_1_D10	pool	1	0	0	0	0.0416159	0.0504412	3.17381	0.171	0.513
1_1_D12	pool	1	0	0	0	0.0394434	0.0415227	2.9291	0.1455	0.481
1_1_E01	mock	1	0	0	0	0.0483736	0.047884	3.04372	0.16425	0.487
1_1_E03	mock	1	0	0	0	0.0451209	0.0454957	2.88049	0.168	0.488
1_1_E04	mock	1	0	0	0	0.040912	0.0466197	3.09923	0.16725	0.494
1_1_E08	pool	1	0	0	0	0.0430508	0.0476296	3.19495	0.15975	0.509
1_1_E10	pool	1	0	0	0	0.0356567	0.0378115	2.74908	0.14925	0.471
1_1_E11	pool	1	0	0	0	0.0446574	0.0480133	2.92391	0.15675	0.515
1_1_E12	pool	1	0	0	0	0.0221196	0.0229269	2.54696	0.1695	0.506
1_1_F02	mock	1	0	0	0	0.0418114	0.0409915	3.01786	0.14625	0.461
1_1_F03	mock	1	0	0	0	0.0405502	0.0444034	2.91782	0.1545	0.495
1_1_F04	mock	1	0	0	0	0.0198557	0.020261	2.90716	0.1365	0.396
1_1_F05	mock	1	0	0	0	0.0377099	0.0390407	2.90511	0.1485	0.427
1_1_F06	mock	1	0	0	0	0.0388063	0.047794	3.05187	0.153	0.484
1_1_F07	pool	1	0	0	0	0.0412926	0.0423725	3.10455	0.174	0.512
1_1_F08	pool	1	0	0	0	0.0279387	0.0307561	2.93342	0.2205	0.533
1_1_F09	pool	1	0	0	0	0.0315328	0.0311376	2.92725	0.159	0.466
1_1_G02	mock	1	0	0	0	0.027952	0.0315049	3.1375	0.16125	0.442
1_1_G03	mock	1	0	0	0	0.0435	0.0482871	3.13723	0.1515	0.499
1_1_G07	pool	1	0	0	0	0.0435542	0.0478691	3.09104	0.15675	0.519
1_1_G08	pool	1	0	0	0	0.0425661	0.041537	3.01443	0.1605	0.487
1_1_G11	pool	1	0	0	0	0.0459378	0.0509567	3.20872	0.16425	0.503
1_1_H08	pool	1	0	0	0	0.0477737	0.0434048	3.23765	0.1485	0.494
1_1_H09	pool	1	0	0	0	0.0381957	0.0451327	3.09571	0.15525	0.486
1_1_H11	pool	1	0	0	0	0.0403494	0.0310996	2.95829	0.171	0.48
1_2_A01	mock	1	0	0	0	0.0481699	0.0479191	3.21078	0.13875	0.498
1_2_A03	mock	1	0	0	0	0.0271354	0.0242159	3.12872	0.15525	0.437
1_2_B03	mock	1	0	0	0	0.0212571	0.0219676	2.88506	0.1485	0.374
1_2_B07	pool	1	0	0	0	0.0435929	0.0474421	3.21688	0.15675	0.503
1_2_B10	pool	1	0	0	0	0.0272066	0.0156305	2.46263	0.159	0.411
1_2_B11	pool	1	0	0	0	0.0504486	0.051568	3.15008	0.15975	0.531
1_2_C01	mock	1	0	0	0	0.0491632	0.0483038	3.16502	0.15525	0.47
1_2_C07	pool	1	0	0	0	0.0451305	0.0444637	3.02203	0.1515	0.482
1_2_C09	pool	1	0	0	0	0.0480259	0.0478638	2.97327	0.16275	0.499
1_2_D03	mock	1	0	0	0	0.0431721	0.0421183	2.92421	0.1515	0.518
1_2_D07	pool	1	0	0	0	0.0416013	0.0402024	2.64611	0.16425	0.491
1_2_D09	pool	1	0	0	0	0.0475324	0.0440353	3.14628	0.1665	0.479
1_2_D12	pool	1	0	0	0	0.0418771	0.0396421	2.9717	0.15975	0.467
1_2_E03	mock	1	0	0	0	0.0415139	0.0440799	3.00467	0.16425	0.5
1_2_E04	mock	1	0	0	0	0.043036	0.0412826	3.07281	0.156	0.476
1_2_E11	pool	1	0	0	0	0.041347	0.0429348	2.89397	0.1575	0.482
1_2_E12	pool	1	0	0	0	0.0161821	0.0172257	2.5991	0.144	0.364
1_2_F06	mock	1	0	0	0	0.0423528	0.0407629	2.48189	0.16425	0.512
1_2_F07	pool	1	0	0	0	0.044292	0.0433913	2.91953	0.1545	0.503
1_2_F09	pool	1	0	0	0	0.0474188	0.0464266	3.09915	0.138	0.494
1_2_G01	mock	1	0	0	0	0.0427361	0.0460427	3.09049	0.14475	0.466
1_2_G06	mock	1	0	0	0	0.0480045	0.0467969	3.13694	0.153	0.503
1_2_G09	pool	1	0	0	0	0.0500736	0.0488889	2.99511	0.16425	0.533
1_2_H03	mock	1	0	0	0	0.0443694	0.0435565	3.05075	0.1515	0.499
1_2_H04	mock	1	0	0	0	0.0521546	0.0471155	3.12928	0.15225	0.512
1_2_H12	pool	1	0	0	0	0.0452987	0.0460539	3.05347	0.15975	0.502
1_2_A02	mock	1	0	0	0	0.0415694	0.0449282	2.96947	0.15075	0.503
1_2_A05	mock	1	0	0	0	0.0211035	0.0223671	2.65315	0.132	0.475
1_2_A09	pool	1	0	0	0	0.0406631	0.0478672	3.0016	0.153	0.518
1_2_A12	pool	1	0	0	0	0.0426772	0.0455159	3.07803	0.15975	0.527
1_2_B01	mock	1	0	0	0	0.0419921	0.0453152	3.0559	0.1515	0.488
1_2_B04	mock	1	0	0	0	0.0439365	0.0456549	3.02348	0.14925	0.479
1_2_B05	mock	1	0	0	0	0.0359337	0.0416619	2.87896	0.1395	0.484
1_2_B06	mock	1	0	0	0	0.0391234	0.0459432	3.08971	0.147	0.493
1_2_B09	pool	1	0	0	0	0.0388399	0.0427001	2.80746	0.1455	0.464
1_2_B12	pool	1	0	0	0	0.0441523	0.0386506	3.01607	0.14325	0.477
1_2_C04	mock	1	0	0	0	0.0414867	0.048725	3.1625	0.15975	0.489
1_2_C05	mock	1	0	0	0	0.0528776	0.0525074	3.15048	0.15675	0.516
1_2_C06	mock	1	0	0	0	0.0425349	0.0464517	3.02685	0.153	0.494
1_2_C08	pool	1	0	0	0	0.044932	0.0481681	3.04341	0.1515	0.518
1_2_C10	pool	1	0	0	0	0.0379888	0.0399267	2.88027	0.144	0.475
1_2_C11	pool	1	0	0	0	0.0422112	0.0472472	2.89718	0.1515	0.5
1_2_C12	pool	1	0	0	0	0.0408798	0.0425816	3.12766	0.15375	0.493
1_2_D02	mock	1	0	0	0	0.0449816	0.0446125	3.09751	0.14025	0.491
1_2_D05	mock	1	0	0	0	0.0380911	0.0380953	2.98072	0.13125	0.466
1_2_D10	pool	1	0	0	0	0.0382627	0.0405322	3.07695	0.141	0.497
1_2_D11	pool	1	0	0	0	0.0431123	0.0456325	2.88278	0.15	0.494
1_2_E01	mock	1	0	0	0	0.0464796	0.0435984	3.05725	0.1575	0.473
1_2_E02	mock	1	0	0	0	0.0447081	0.0480272	3.08341	0.1485	0.48
1_2_E05	mock	1	0	0	0	0.0436593	0.0439107	3.02705	0.15075	0.509
1_2_E06	mock	1	0	0	0	0.0273453	0.023364	2.95988	0.14325	0.383
1_2_E07	pool	1	0	0	0	0.0418119	0.0441836	3.16328	0.14775	0.503
1_2_E09	pool	1	0	0	0	0.0420866	0.0454285	3.03601	0.1455	0.497
1_2_E10	pool	1	0	0	0	0.0416719	0.0446213	3.13285	0.141	0.47
1_2_F01	mock	1	0	0	0	0.0389399	0.040897	3.01202	0.13875	0.482
1_2_F02	mock	1	0	0	0	0.0408736	0.0418434	3.14528	0.14925	0.488
1_2_F03	mock	1	0	0	0	0.044659	0.0476206	3.13401	0.1485	0.492
1_2_F04	mock	1	0	0	0	0.0411211	0.0416523	3.06486	0.15	0.488
1_2_F05	mock	1	0	0	0	0.0434027	0.0451231	3.09981	0.15525	0.495
1_2_F10	pool	1	0	0	0	0.0412114	0.0438162	2.90267	0.15225	0.502
1_2_F11	pool	1	0	0	0	0.0418444	0.0454138	3.04235	0.16575	0.5
1_2_G02	mock	1	0	0	0	0.0436727	0.0491048	3.22178	0.15975	0.519
1_2_G03	mock	1	0	0	0	0.043249	0.047503	3.13489	0.147	0.494
1_2_G04	mock	1	0	0	0	0.0441738	0.0403182	3.00588	0.1365	0.466
1_2_G07	pool	1	0	0	0	0.0415722	0.0456266	3.02549	0.14325	0.487
1_2_G08	pool	1	0	0	0	0.0347938	0.0416105	2.98997	0.13875	0.456
1_2_G10	pool	1	0	0	0	0.043328	0.0496238	3.20763	0.1545	0.518
1_2_G11	pool	1	0	0	0	0.0469106	0.0500712	3.04413	0.1545	0.519
1_2_G12	pool	1	0	0	0	0.0423698	0.0439117	2.75845	0.1575	0.494
1_2_H01	mock	1	0	0	0	0.0395264	0.0381082	2.98311	0.1365	0.467
1_2_H05	mock	1	0	0	0	0.0434266	0.0472739	3.11477	0.147	0.498
1_2_H06	mock	1	0	0	0	0.0421127	0.0500935	3.15132	0.1485	0.482
1_2_H07	pool	1	0	0	0	0.0451853	0.0456136	3.07491	0.1575	0.501
1_2_H09	pool	1	0	0	0	0.0486413	0.0460409	3.05014	0.135	0.515
1_2_H10	pool	1	0	0	0	0.0318304	0.0315898	2.56257	0.12675	0.4
1_2_H11	pool	1	0	0	0	0.0411485	0.0426768	3.0524	0.14475	0.476
1_3_A06	pool	1	0	0	0	0.0512248	0.0533773	3.2491	0.1545	0.479
1_3_A09	pool	1	0	0	0	0.0317994	0.0210619	2.33722	0.1335	0.389
1_3_B06	pool	1	0	0	0	0.0485503	0.0488283	3.14142	0.14925	0.521
1_3_B07	pool	1	0	0	0	0.0442116	0.0413562	3.11516	0.15375	0.485
1_3_C04	pool	1	0	0	0	0.0483182	0.0528852	2.64636	0.15825	0.508
1_3_A01	pool	1	0	0	0	0.0472013	0.0472567	3.13124	0.14925	0.501
1_3_A02	pool	1	0	0	0	0.0460301	0.0503623	3.0419	0.1605	0.525
1_3_A04	pool	1	0	0	0	0.0197563	0.0148348	2.32347	0.0945	0.381
1_3_A07	pool	1	0	0	0	0.0427523	0.0459646	2.97127	0.15525	0.505
1_3_A10	pool	1	0	0	0	0.0543597	0.0559639	3.28331	0.15675	0.516
1_3_B01	pool	1	0	0	0	0.0393914	0.0419429	3.04326	0.14475	0.488
1_3_B02	pool	1	0	0	0	0.0418017	0.0481257	3.02991	0.156	0.509
1_3_B03	pool	1	0	0	0	0.0440425	0.0434501	3.08885	0.14925	0.501
1_3_B04	pool	1	0	0	0	0.0413816	0.0404206	3.13681	0.153	0.492
1_3_B05	pool	1	0	0	0	0.0424447	0.0430089	3.30144	0.1575	0.493
1_3_B08	pool	1	0	0	0	0.03877	0.0421426	2.99246	0.165	0.464
1_3_B10	pool	1	0	0	0	0.0405088	0.0450515	2.99059	0.14925	0.479
1_3_B12	pool	1	0	0	0	0.0388339	0.0401994	3.00927	0.13875	0.471
1_3_C01	pool	1	0	0	0	0.0459616	0.0426979	3.11671	0.16575	0.519
1_3_C03	pool	1	0	0	0	0.0433591	0.0495084	3.20588	0.16125	0.501
1_3_C05	pool	1	0	0	0	0.0495506	0.0473112	3.02264	0.1485	0.497
1_3_C08	pool	1	0	0	0	0.0406506	0.0422882	2.76601	0.14475	0.467
1_3_C09	pool	1	0	0	0	0.0491601	0.0515737	3.1593	0.1575	0.518
1_3_C10	pool	1	0	0	0	0.0503072	0.0560723	3.18004	0.14325	0.522
1_1_A03	mock	0	1	1	10	0.0550622	0.055076	3.35599			139.62	108.413
1_1_A04	mock	0	1	1	10	0.0640807	0.0643224	3.60988			243.667	198.436
1_1_A06	mock	0	1	1	10	0.0583359	0.0567899	3.5447			226.739	189.724
1_1_A08	pool	0	1	1	10	0.0554843	0.0535551	3.45402			201.429	210.453
1_1_A12	pool	0	1	1	10	0.0527142	0.0532282	3.42208			181.762	132.753
1_1_B01	mock	0	1	1	10	0.0562221	0.0571022	3.40112			192.159	179.552
1_1_B05	mock	0	1	1	10	0.053403	0.0535547	3.28573			167.161	139.333
1_1_B06	mock	0	1	1	10	0.0620619	0.0580499	3.49546			145.481	158.412
1_1_B09	pool	0	1	1	10	0.0477857	0.0449853	3.00097			175.917	135.747
1_1_C02	mock	0	1	1	10	0.0511277	0.0526664	3.34845			156.57	117.79
1_1_C08	pool	0	1	1	10	0.0439778	0.0411158	3.1309			123.44	93.0009
1_1_D12	pool	0	1	1	10	0.0578358	0.0491067	3.13768			173.125	168.402
1_1_E03	mock	0	1	1	10	0.0507036	0.0496274	3.13737			202.549	187.575
1_1_E06	mock	0	1	1	10	0.0491955	0.0485029	3.21659			182.245	174.367
1_1_E08	pool	0	1	1	10	0.0575984	0.0585881	3.55489			148.839	92.3103
1_1_E11	pool	0	1	1	10	0.0576874	0.055425	3.33667
1_1_F02	mock	0	1	1	10	0.0504276	0.0501579	3.40261
1_1_F03	mock	0	1	1	10	0.0551892	0.0574111	3.26246			130.429	121.927
1_1_F09	pool	0	1	1	10	0.033813	0.0328109	3.27986			138.158	122.379
1_1_F10	pool	0	1	1	10	0.0482287	0.049534	3.29449			149.568	136.986
1_1_G10	pool	0	1	1	10	0.0309496	0.0281596	3.37857
1_1_G12	pool	0	1	1	10	0.0596983	0.0571142	3.20458			86.0432	88.4152
1_1_H07	pool	0	1	1	10	0.0172625	0.0205277	2.7551			114.417	93.7769
1_1_H09	pool	0	1	1	10	0.0495134	0.0560441	3.39185			152.768	161.467
1_1_A07	pool	0	1	1	10	0.0498575	0.0496019	3.36884			156.305	138.129
1_1_A09	pool	0	1	1	10	0.047827	0.0545107	3.3035			160.274	127.495
1_1_A11	pool	0	1	1	10	0.0534518	0.0547969	3.42703			140.339	128.036
1_1_B02	mock	0	1	1	10	0.0295726	0.0398444	3.31132			166.415	138.667
1_1_B03	mock	0	1	1	10	0.0333834	0.0291487	3.21094			148.974	147.245
1_1_C07	pool	0	1	1	10	0.0224506	0.0237507	3.01109			151.553	117.571
1_1_C10	pool	0	1	1	10	0.0465081	0.0345313	3.25462			150.304	129.179
1_1_C11	pool	0	1	1	10	0.0507916	0.057468	2.90955			238.143	216.136
1_1_C12	pool	0	1	1	10	0.0490243	0.0513883	3.11326			169.014	157.275
1_1_D08	pool	0	1	1	10	0.0462606	0.0503905	3.27977
1_1_D11	pool	0	1	1	10	0.0509761	0.051285	3.42425			220.067	228.956
1_1_E01	mock	0	1	1	10	0.055732	0.0584172	3.26913			196.628	183.291
1_1_E02	mock	0	1	1	10	0.0509384	0.0519387	3.36945			165.466	145.273
1_1_E04	mock	0	1	1	10	0.0533015	0.0505069	3.30139			77.339	62.3564
1_1_E05	mock	0	1	1	10	0.0461744	0.0435179	3.32269			113.696	128.105
1_1_E07	pool	0	1	1	10	0.0482755	0.0471798	3.3584			211.24	175.298
1_1_E10	pool	0	1	1	10	0.0457807	0.0474093	3.15158			63.4444	56.8495
1_1_F01	mock	0	1	1	10	0.0558558	0.0641241	3.40957			48.6649	47.8675
1_1_F04	mock	0	1	1	10	0.0240144	0.0261578	3.00426			88.4863	83.3997
1_1_F05	mock	0	1	1	10	0.0467745	0.0450952	3.31562			160.448	118.086
1_1_F07	pool	0	1	1	10	0.0511109	0.0498784	3.25973			210.102	170.534
1_1_F08	pool	0	1	1	10	0.0249633	0.026984	2.91931			189.601	176.268
1_1_F11	pool	0	1	1	10	0.053881	0.0512688	3.42893			103.911	140.566
1_1_G02	mock	0	1	1	10	0.0357185	0.0353278	3.44287			72.1621	63.1636
1_1_G03	mock	0	1	1	10	0.0568586	0.0616607	3.4943			188.726	183.121
1_1_G08	pool	0	1	1	10	0.0523423	0.0490522	3.31369
1_1_G11	pool	0	1	1	10	0.0526312	0.0565635	3.33388			141.409	133.665
1_1_H11	pool	0	1	1	10	0.0492371	0.0420841	3.25476			91.26	78.5373
1_2_A08	pool	0	1	1	0	0.054398	0.0523992	3.70406	0.12	0.464	1.44748	5.16208
1_2_A09	pool	0	1	1	0	0.0614749	0.0603592	3.5844	0.105	0.453	31.9209	5.11877
1_2_A12	pool	0	1	1	0	0.0472496	0.0470756	3.2458	0.118	0.419	18.869	40.5783
1_2_B03	mock	0	1	1	0	0.024851	0.0264854	3.21309	0.166	0.372	1.23854	4.36591
1_2_D03	mock	0	1	1	0	0.0532757	0.0508073	3.28226	0.119	0.438	6.27459	13.1726
1_2_E02	mock	0	1	1	0	0.053446	0.0540084	3.45179	0.115	0.458	3.30241	13.0679
1_2_E05	mock	0	1	1	0	0.0541562	0.0526165	3.33406	0.129	0.474
1_2_F01	mock	0	1	1	0	0.0531895	0.0566822	3.47664	0.119	0.465	8.27548	27.9853
1_2_F05	mock	0	1	1	0	0.0501099	0.0540145	3.56085	0.151	0.441	5.45513	21.3292
1_2_F06	mock	0	1	1	0	0.0527154	0.0533336	2.67398	0.162	0.448	19.5972	7.40215
1_2_F07	pool	0	1	1	0	0.0610244	0.0564755	3.38292	0.153	0.462	3.30793	3.9333
1_2_G01	mock	0	1	1	0	0.0638657	0.0581692	3.63184	0.135	0.447	0.590174	0.362203
1_2_G04	mock	0	1	1	0	0.0485293	0.0503733	3.31277	0.112	0.429	12.3166	4.08392
1_2_G10	pool	0	1	1	0	0.0602164	0.0603653	3.68251	0.143	0.483	10.2487	0.551267
1_2_G12	pool	0	1	1	0	0.056961	0.0556158	3.27111	0.145	0.437	2.29729	8.98941
1_2_H03	mock	0	1	1	0	0.0525855	0.0541669	3.52698	0.13	0.45	0.170899	0.548305
1_2_H04	mock	0	1	1	0	0.0591077	0.058945	3.55031	0.116	0.476	6.66418	0.558919
1_2_H10	pool	0	1	1	0	0.0396313	0.0426801	2.94028	0.139	0.417	3.64417	12.1577
1_2_A07	pool	0	1	1	0	0.0488001	0.0511682	3.34618	0.113	0.442	6.38564	19.4695
1_2_A10	pool	0	1	1	0	0.0503774	0.0493819	3.55267	0.107	0.44	5.68981	18.7254
1_2_A11	pool	0	1	1	0	0.0512395	0.0491785	3.32413	0.114	0.429	1.87499	4.57671
1_2_B07	pool	0	1	1	0	0.0658365	0.0661231	3.55249	0.155	0.501	1.1058	1.40092
1_2_B10	pool	0	1	1	0	0.0302527	0.0224571	2.90619	0.166	0.391	1.61686	5.90771
1_2_C01	mock	0	1	1	0	0.0547498	0.0539102	3.59275	0.113	0.427	12.0926	16.2912
1_2_C05	mock	0	1	1	0	0.0594734	0.0593001	3.64202	0.118	0.496	4.34807	8.83337
1_2_C06	mock	0	1	1	0	0.0503605	0.0498365	3.40861	0.127	0.474	7.29204	13.2884
1_2_C07	pool	0	1	1	0	0.0573321	0.051826	3.47135	0.134	0.426	0.974543	3.53097
1_2_C08	pool	0	1	1	0	0.0555515	0.0561922	3.47178	0.118	0.45
1_2_C09	pool	0	1	1	0	0.0541163	0.0561928	3.21062	0.153	0.461	14.4924	11.9234
1_2_C10	pool	0	1	1	0	0.0469229	0.048332	3.3233	0.139	0.41	1.25287	4.26593
1_2_D02	mock	0	1	1	0	0.0493909	0.0554929	3.55445	0.147	0.45	6.38445	17.1323
1_2_D05	mock	0	1	1	0	0.0463143	0.0479729	3.441	0.108	0.446	2.06032	8.24129
1_2_D07	pool	0	1	1	0	0.045918	0.0490756	3.22585	0.123	0.425	79.2146	192.498
1_2_D09	pool	0	1	1	0	0.0549262	0.0590372	3.52372	0.129	0.453	2.8645	8.55248
1_2_D10	pool	0	1	1	0	0.052195	0.050106	3.44178	0.118	0.43	10.1628	8.1322
1_2_D11	pool	0	1	1	0	0.0518477	0.0553357	3.36229	0.134	0.438	5.83712	11.7616
1_2_E03	mock	0	1	1	0	0.06105	0.0542047	3.42434	0.145	0.431	1.91572	4.19107
1_2_E04	mock	0	1	1	0	0.0550515	0.0523824	3.45036	0.137	0.468	1.96331	6.08362
1_2_E06	mock	0	1	1	0	0.0269255	0.0316695	3.28156			59.9766	27.3315
1_2_E07	pool	0	1	1	0	0.0518556	0.0570159	3.56751	0.139	0.44	8.3972	30.8582
1_2_E09	pool	0	1	1	0	0.0508871	0.0546198	3.36684	0.124	0.415	35.595	1.77756
1_2_E11	pool	0	1	1	0	0.0480805	0.0484105	3.16526	0.137	0.429	7.35843	26.2896
1_2_F02	mock	0	1	1	0	0.0581206	0.0577572	3.59548	0.139	0.467	2.58388	10.2248
1_2_F03	mock	0	1	1	0	0.0572931	0.0594095	3.61502	0.139	0.466	6.86826	10.6041
1_2_F04	mock	0	1	1	0	0.0524246	0.0505087	3.5061	0.118	0.456	10.7096	40.0461
1_2_F09	pool	0	1	1	0	0.0541276	0.0596128	3.50685	0.121	0.467	34.4589	0.0134595
1_2_F10	pool	0	1	1	0	0.0599108	0.0558165	3.38091	0.124	0.456	50.4773	11.9957
1_2_F11	pool	0	1	1	0	0.0510433	0.0553925	3.4842	0.145	0.452	15.6585	6.5788
1_2_G06	pool	0	1	1	0	0.0621394	0.0594114	3.59242	0.134	0.467	8.95489	22.7919
1_2_G08	pool	0	1	1	0	0.0436656	0.0504981	3.44622	0.133	0.45	16.1827	12.1049
1_2_G11	pool	0	1	1	0	0.0582074	0.0629589	3.4072	0.121	0.477	17.3817	13.296
1_2_H05	mock	0	1	1	0	0.0547705	0.0533686	3.46572	0.134	0.429	56.2001	8.81583
1_2_H06	mock	0	1	1	0	0.0553773	0.0555354	3.49421	0.118	0.469	51.6181	57.8923
1_2_H07	pool	0	1	1	0	0.0528231	0.0528392	3.33879	0.123	0.468	11.0594	5.77724
1_2_H09	pool	0	1	1	0	0.0602307	0.0586091	3.50325	0.114	0.479	0.713996	2.85599
1_2_H11	pool	0	1	1	0	0.057691	0.0599679	3.59371	0.134	0.489	12.4157	43.4488
